# Supplementary material for: Comparative RNA-seq analysis reveals a critical role for ethylene in rose (Rosa hybrida) susceptible response to Podosphera pannosa
Source: Front Plant Sci. 2022 Sep 27;13:1018427. doi: 10.3389/fpls.2022.1018427 (PMC9551381; doi:10.3389/fpls.2022.1018427)
Supplement: Supplementary file 2 [file Table_3.xlsx]

## Sheet: Sheet1
ID	log2(12h_0h)	12h_0h p_value	12h_0h q_value	log2(24h_0h)	24h_0h p_value	24h_0h q_value	log2(48h_0h)	48h_0h p_value	48h_0h q_value	description	nr	InterPro GO IDs	KEGG
RchiOBHm_Chr1g0313231	-2.46567	5e-05	0.00322834	--	--	--	-3.41402	0.00015	0.00788832	uncharacterized LOC112175605	uncharacterized protein LOC112175605 [Rosa chinensis]	--	--
RchiOBHm_Chr1g0314251	--	--	--	--	--	--	3.53404	5e-05	0.00322834	siroheme synthase-like	uncharacterized protein LOC112178593 [Rosa chinensis]	P:GO:0006779; P:GO:0008152; F:GO:0008168; P:GO:0055114	K02303 map00860 Porphyrin metabolism
RchiOBHm_Chr1g0314821	--	--	--	--	--	--	-1.91666	0.00075	0.026584	cytochrome P450 705A22-like	putative beta-amyrin 24-hydroxylase [Rosa chinensis]	F:GO:0005506; P:GO:0055114; F:GO:0020037	K00512 map01100 Metabolic pathways
RchiOBHm_Chr1g0314931	--	--	--	-2.42821	5e-05	0.00322834	--	--	--	DNA damage-repair/toleration protein DRT100	DNA damage-repair/toleration protein DRT100 [Rosa chinensis]	F:GO:0005515	--
RchiOBHm_Chr1g0315741	--	--	--	-2.23154	0.00105	0.0339528	--	--	--	anthocyanin 5-aromatic acyltransferase-like	putative anthocyanin 5-(6'''-hydroxycinnamoyltransferase) [Rosa chinensis]	--	--
RchiOBHm_Chr1g0315851	--	--	--	--	--	--	-1.70775	0.0009	0.0303727	ADP,ATP carrier protein 1, mitochondrial-like	ADP,ATP carrier protein 1, mitochondrial-like [Rosa chinensis]	P:GO:0055085; P:GO:0006810; F:GO:0005215; C:GO:0005743	K20782 map00514 Other types of O-glycan biosynthesis
RchiOBHm_Chr1g0316461	-2.64499	0.00085	0.0292322	--	--	--	3.0308	0.00165	0.0467628	polyketide synthase 1	polyketide synthase 1 [Rosa chinensis]	F:GO:0003824; P:GO:0008152; P:GO:0009058	K00660 map00941 Flavonoid biosynthesis
RchiOBHm_Chr1g0317061	-2.67192	0.0007	0.0253552	-3.71878	5e-05	0.00322834	--	--	--	uncharacterized LOC112182672	uncharacterized protein LOC112182672 [Rosa chinensis]	--	--
RchiOBHm_Chr1g0318291	--	--	--	--	--	--	-3.19133	0.00015	0.00788832	protein BPS1, chloroplastic-like	protein BPS1, chloroplastic-like [Rosa chinensis]	--	--
RchiOBHm_Chr1g0321761	--	--	--	-2.08782	0.0001	0.00572684	--	--	--	protein LNK2-like	protein LNK2-like isoform X2 [Rosa chinensis]	--	--
RchiOBHm_Chr1g0325681	--	--	--	--	--	--	-2.4443	0.00025	0.0115953	protein spotted leaf 11	putative aminoacyltransferase, E1 ubiquitin-activating enzyme [Rosa chinensis]	F:GO:0005488	--
RchiOBHm_Chr1g0325821	--	--	--	--	--	--	-2.76665	5e-05	0.00322834	sigma factor binding protein 2, chloroplastic-like	hypothetical protein RchiOBHm_Chr1g0325821 [Rosa chinensis]	--	--
RchiOBHm_Chr1g0327381	--	--	--	--	--	--	-3.48463	0.00115	0.0362702	cytosolic sulfotransferase 15-like	cytosolic sulfotransferase 15-like [Rosa chinensis]	F:GO:0008146	--
RchiOBHm_Chr1g0327441	--	--	--	-3.82182	5e-05	0.00322834	-2.0683	0.00105	0.0339528	cytosolic sulfotransferase 15-like	cytosolic sulfotransferase 15-like isoform X1 [Rosa chinensis]	F:GO:0008146	--
RchiOBHm_Chr1g0327901	-1.64176	0.0007	0.0253552	-1.63988	0.0013	0.0396058	--	--	--	probable carboxylesterase 15	probable carboxylesterase 15 [Rosa chinensis]	P:GO:0008152; F:GO:0016787	--
RchiOBHm_Chr1g0328041	--	--	--	3.34974	0.00065	0.0239894	--	--	--	pectin acetylesterase 10-like	pectin acetylesterase 10-like [Rosa chinensis]	F:GO:0016787	--
RchiOBHm_Chr1g0329921	-1.67111	0.00135	0.04063	--	--	--	--	--	--	methylesterase 1-like	methylesterase 1-like [Rosa chinensis]	--	--
RchiOBHm_Chr1g0330991	--	--	--	--	--	--	-1.65398	0.0014	0.0416089	probable pectinesterase/pectinesterase inhibitor 25	probable pectinesterase/pectinesterase inhibitor 25 [Rosa chinensis]	F:GO:0004857; C:GO:0005618; P:GO:0042545; F:GO:0030599	K01051 map00040 Pentose and glucuronate interconversions
RchiOBHm_Chr1g0331581	--	--	--	--	--	--	-2.254	0.0018	0.0498395	inactive protein RESTRICTED TEV MOVEMENT 2	inactive protein RESTRICTED TEV MOVEMENT 2 [Rosa chinensis]	--	--
RchiOBHm_Chr1g0331611	-2.04393	0.00045	0.0182298	--	--	--	--	--	--	50S ribosomal protein 5, chloroplastic	50S ribosomal protein 5, chloroplastic [Rosa chinensis]	--	--
RchiOBHm_Chr1g0332791	-1.52337	0.00135	0.04063	--	--	--	--	--	--	DNA-directed RNA polymerases II and IV subunit 5A-like	DNA-directed RNA polymerases II and IV subunit 5A-like [Rosa chinensis]	F:GO:0003677; C:GO:0005634; F:GO:0003899	K03013 map03020 RNA polymerase
RchiOBHm_Chr1g0336981	1.92728	5e-05	0.00322834	1.63365	0.00055	0.0211442	--	--	--	glycosyltransferase family protein 64 protein C5	glycosyltransferase family protein 64 protein C5 [Rosa chinensis]	P:GO:0015012; P:GO:0006024; C:GO:0016021	--
RchiOBHm_Chr1g0339861	2.90862	0.00055	0.0211442	3.88166	5e-05	0.00322834	--	--	--	glycine-rich protein DOT1-like	glycine-rich protein DOT1-like [Rosa chinensis]	--	--
RchiOBHm_Chr1g0340711	-2.12189	0.0013	0.0396058	-2.68611	0.0001	0.00572684	--	--	--	uncharacterized LOC112176642	uncharacterized protein LOC112176642 [Rosa chinensis]	--	--
RchiOBHm_Chr1g0344521	-7.26538	0.0002	0.00978718	-5.99972	5e-05	0.00322834	-2.57143	5e-05	0.00322834	probable mediator of RNA polymerase II transcription subunit 37c	probable mediator of RNA polymerase II transcription subunit 37c [Rosa chinensis]	--	K03283 map03040 Spliceosome
RchiOBHm_Chr1g0345981	--	--	--	-3.93095	0.0005	0.0197317	--	--	--	cyclin-U4-1-like	cyclin-U4-1-like [Rosa chinensis]	F:GO:0019901; P:GO:0000079	--
RchiOBHm_Chr1g0347641	-3.08433	0.00105	0.0339528	-3.64735	0.005	0.0102692	--	--	--	ethylene-responsive transcription factor 2-like	ethylene-responsive transcription factor 2-like [Rosa chinensis]	F:GO:0003677	K14517 map04075 Plant hormone signal transduction
RchiOBHm_Chr1g0349271	-2.92252	5e-05	0.00322834	-3.16631	5e-05	0.00322834	--	--	--	putative lipid-binding protein At4g00165	putative lipid-binding protein At4g00165 [Rosa chinensis]	--	--
RchiOBHm_Chr1g0349671	--	--	--	2.65855	0.0012	0.0373427	--	--	--	pectinesterase inhibitor 9	pectinesterase inhibitor 9 [Rosa chinensis]	F:GO:0004857	--
RchiOBHm_Chr1g0349751	--	--	--	--	--	--	-4.79089	5e-05	0.00322834	arginase 1, mitochondrial-like	arginase 1, mitochondrial-like isoform X1 [Rosa chinensis]	F:GO:0046872	K01476 map00220 Arginine biosynthesis
RchiOBHm_Chr1g0350041	--	--	--	--	--	--	2.23963	0.0004	0.0166112	protein NSP-INTERACTING KINASE 2	protein NSP-INTERACTING KINASE 2 [Rosa chinensis]	F:GO:0005524; F:GO:0005515; F:GO:0004672; P:GO:0006468	--
RchiOBHm_Chr1g0350591	-2.38024	5e-05	0.00322834	--	--	--	--	--	--	uncharacterized LOC112181509	uncharacterized protein LOC112181509 [Rosa chinensis]	--	--
RchiOBHm_Chr1g0350871	--	--	--	-2.00547	0.00045	0.0182298	--	--	--	fasciclin-like arabinogalactan protein 10	fasciclin-like arabinogalactan protein 10 [Rosa chinensis]	--	--
RchiOBHm_Chr1g0352551	-1.94164	5e-05	0.00322834	--	--	--	--	--	--	probable methyltransferase PMT15	probable methyltransferase PMT15 [Rosa chinensis]	F:GO:0008168	--
RchiOBHm_Chr1g0354001	1.78298	0.00025	0.0115953	--	--	--	-2.01805	5e-05	0.00322834	acetyl-coenzyme A carboxylase carboxyl transferase subunit alpha, chloroplastic-like	acetyl-coenzyme A carboxylase carboxyl transferase subunit alpha, chloroplastic-like [Rosa chinensis]	F:GO:0003989; P:GO:0006633; C:GO:0009317; F:GO:0016874	K01962 map00061 Fatty acid biosynthesis
RchiOBHm_Chr1g0355071	--	--	--	--	--	--	1.62485	0.00075	0.026584	UPF0187 protein At3g61320, chloroplastic-like	UPF0187 protein At3g61320, chloroplastic-like [Rosa chinensis]	--	--
RchiOBHm_Chr1g0355161	--	--	--	--	--	--	1.62914	0.0004	0.0166112	beta-amylase 2, chloroplastic	beta-amylase 2, chloroplastic [Rosa chinensis]	P:GO:0005975; P:GO:0000272; F:GO:0016161	K01177 map00500 Starch and sucrose metabolism
RchiOBHm_Chr1g0355771	--	--	--	-1.94195	0.0002	0.00978718	--	--	--	aquaporin PIP1-3	aquaporin PIP1-3 [Rosa chinensis]	C:GO:0016020; P:GO:0006810; F:GO:0005215	--
RchiOBHm_Chr1g0355841	1.53883	0.0006	0.0226208	--	--	--	--	--	--	probable glycerol-3-phosphate acyltransferase 8	probable glycerol-3-phosphate acyltransferase 8 [Rosa chinensis]	P:GO:0008152	K13508 map00561 Glycerolipid metabolism
RchiOBHm_Chr1g0356641	--	--	--	--	--	--	2.14041	5e-05	0.00322834	L-3-cyanoalanine synthase 2, mitochondrial	L-3-cyanoalanine synthase 2, mitochondrial [Rosa chinensis]	F:GO:0004124; P:GO:0006535	K13034 map00270 Cysteine and methionine metabolism
RchiOBHm_Chr1g0357161	-2.66715	5e-05	0.00322834	-3.23632	5e-05	0.00322834	--	--	--	probable polygalacturonase	probable polygalacturonase [Rosa chinensis]	P:GO:0005975; F:GO:0004650	--
RchiOBHm_Chr1g0357191	1.61163	0.0011	0.0351307	--	--	--	--	--	--	probable serine/threonine-protein kinase At1g01540	probable serine/threonine-protein kinase At1g01540 [Rosa chinensis]	F:GO:0005524; F:GO:0004672; P:GO:0006468	--
RchiOBHm_Chr1g0357771	-3.29061	5e-05	0.00322834	-2.46917	0.0006	0.0226208	-2.98544	5e-05	0.00322834	desiccation protectant protein Lea14 homolog	desiccation protectant protein Lea14 homolog [Rosa chinensis]	P:GO:0009269	--
RchiOBHm_Chr1g0358261	--	--	--	--	--	--	-2.07578	5e-05	0.00322834	uncharacterized LOC112181841	uncharacterized protein LOC112181841 [Rosa chinensis]	--	--
RchiOBHm_Chr1g0358641	--	--	--	-1.5753	0.00105	0.0339528	--	--	--	putative glucose-6-phosphate 1-epimerase	putative glucose-6-phosphate 1-epimerase [Rosa chinensis]	P:GO:0005975; F:GO:0003824; F:GO:0030246; F:GO:0016853	K01792 map00010 Glycolysis / Gluconeogenesis
RchiOBHm_Chr1g0358711	--	--	--	3.09065	5e-05	0.00322834	--	--	--	thaumatin-like protein 1b	thaumatin-like protein 1b [Rosa chinensis]	--	--
RchiOBHm_Chr1g0358871	--	--	--	--	--	--	2.10336	0.0002	0.00978718	protein SUPPRESSOR OF PHYA-105 1-like	protein SUPPRESSOR OF PHYA-105 1-like [Rosa chinensis]	F:GO:0005524; F:GO:0005515; F:GO:0004672; P:GO:0006468	K16240 map04712 Circadian rhythm - plant
RchiOBHm_Chr1g0359491	-1.7835	0.001	0.0328082	-1.95993	0.00075	0.026584	--	--	--	uncharacterized LOC112182026	hypothetical protein RchiOBHm_Chr1g0359491 [Rosa chinensis]	--	--
RchiOBHm_Chr1g0359611	-2.69079	0.00115	0.0362702	-2.40988	0.00165	0.0467628	-3.29047	0.0011	0.0351307	lachrymatory-factor synthase-like	putative polyketide cyclase/dehydrase, START-like domain-containing protein [Rosa chinensis]	--	--
RchiOBHm_Chr1g0360041	2.23152	0.0008	0.027924	--	--	--	--	--	--	auxin response factor 18-like	auxin response factor 18-like [Rosa chinensis]	F:GO:0003677; C:GO:0005634; F:GO:0005515; P:GO:0009725	K14486 map04075 Plant hormone signal transduction
RchiOBHm_Chr1g0360101	--	--	--	--	--	--	-1.74811	0.0008	0.027924	uncharacterized LOC112182043	hypothetical protein RchiOBHm_Chr1g0360101 [Rosa chinensis]	--	--
RchiOBHm_Chr1g0360421	--	--	--	-1.56873	0.0015	0.0436334	--	--	--	uncharacterized LOC112182086	uncharacterized protein LOC112182086 [Rosa chinensis]	--	--
RchiOBHm_Chr1g0360621	--	--	--	-1.81872	0.0011	0.0351307	--	--	--	uncharacterized LOC112196124	uncharacterized protein LOC112196124 [Rosa chinensis]	--	--
RchiOBHm_Chr1g0360641	-1.92083	0.00025	0.0115953	--	--	--	--	--	--	uncharacterized LOC112173235	uncharacterized protein LOC112173235 [Rosa chinensis]	--	--
RchiOBHm_Chr1g0360751	-3.06406	5e-05	0.00322834	--	--	--	-4.7363	5e-05	0.00322834	homeobox-leucine zipper protein ATHB-12	homeobox-leucine zipper protein ATHB-12 isoform X1 [Rosa chinensis]	F:GO:0003677; F:GO:0043565	--
RchiOBHm_Chr1g0360811	-2.08072	0.00025	0.0115953	-2.66042	5e-05	0.00322834	--	--	--	transcription factor MYC3	transcription factor MYC3 [Rosa chinensis]	F:GO:0046983	K13422 map04016 MAPK signaling pathway - plant
RchiOBHm_Chr1g0361191	--	--	--	-2.2953	5e-05	0.00322834	--	--	--	transcription factor bHLH57-like	transcription factor bHLH57-like [Rosa chinensis]	P:GO:0008152; F:GO:0046983; F:GO:0016597	--
RchiOBHm_Chr1g0361201	-3.16164	5e-05	0.00322834	-3.23159	5e-05	0.00322834	--	--	--	protein CURVATURE THYLAKOID 1B, chloroplastic	protein CURVATURE THYLAKOid 1B, chloroplastic [Rosa chinensis]	--	--
RchiOBHm_Chr1g0361871	--	--	--	--	--	--	2.38855	0.0009	0.0303727	bark storage protein A-like	bark storage protein A-like [Rosa chinensis]	F:GO:0003824; P:GO:0009116	--
RchiOBHm_Chr1g0362291	--	--	--	--	--	--	-2.61473	5e-05	0.00322834	uncharacterized LOC112182297	uncharacterized protein LOC112182297 [Rosa chinensis]	--	--
RchiOBHm_Chr1g0362811	2.2614	5e-05	0.00322834	1.60358	0.0009	0.0303727	--	--	--	amino acid transporter AVT1C-like	putative amino acid transporter, transmembrane domain-containing protein [Rosa chinensis]	--	--
RchiOBHm_Chr1g0362951	--	--	--	--	--	--	-2.66749	5e-05	0.00322834	probable acetyltransferase NATA1-like	probable acetyltransferase NATA1-like [Rosa chinensis]	F:GO:0008080	--
RchiOBHm_Chr1g0363461	--	--	--	-2.02606	0.0013	0.0396058	--	--	--	tyrosine-specific transport protein-like	uncharacterized protein LOC112176692 isoform X2 [Rosa chinensis]	C:GO:0005887; F:GO:0015173; P:GO:0015801; P:GO:0003333	--
RchiOBHm_Chr1g0364061	1.53872	0.0011	0.0351307	--	--	--	--	--	--	mitochondrial substrate carrier family protein C	mitochondrial substrate carrier family protein C [Rosa chinensis]	P:GO:0055085; F:GO:0005509	K05857 map00562 Inositol phosphate metabolism
RchiOBHm_Chr1g0364991	--	--	--	--	--	--	1.50495	0.00145	0.0426478	histone H4	putative histone H14 [Helianthus annuus]	F:GO:0003677; C:GO:0005634; F:GO:0046982; C:GO:0000786; P:GO:0006334	--
RchiOBHm_Chr1g0365111	--	--	--	--	--	--	2.83801	5e-05	0.00322834	chalcone--flavonone isomerase 2	chalcone--flavonone isomerase 2 [Rosa chinensis]	F:GO:0045430; F:GO:0016872; P:GO:0009813	K01859 map00941 Flavonoid biosynthesis
RchiOBHm_Chr1g0365771	-1.95118	0.00035	0.015033	-2.21044	0.00015	0.00788832	--	--	--	photosynthetic NDH subunit of lumenal location 1, chloroplastic	photosynthetic NDH subunit of lumenal location 1, chloroplastic [Rosa chinensis]	F:GO:0005509; C:GO:0009523; C:GO:0009654; P:GO:0015979; C:GO:0019898	K02717 map00195 Photosynthesis
RchiOBHm_Chr1g0365871	-1.79213	0.0002	0.00978718	--	--	--	-1.5586	0.0017	0.0477705	actin-depolymerizing factor 1	actin-depolymerizing factor 1 [Rosa chinensis]	F:GO:0003779; P:GO:0030042; C:GO:0015629; C:GO:0005622	--
RchiOBHm_Chr1g0366531	-4.14506	5e-05	0.00322834	-2.69598	5e-05	0.00322834	--	--	--	heat shock cognate 70 kDa protein 2-like	heat shock cognate 70 kDa protein 2-like [Rosa chinensis]	--	K03283 map03040 Spliceosome
RchiOBHm_Chr1g0367091	-1.98077	0.00055	0.0211442	-2.33788	5e-05	0.00322834	--	--	--	glucan endo-1,3-beta-glucosidase-like	glucan endo-1,3-beta-glucosidase-like [Rosa chinensis]	P:GO:0005975	--
RchiOBHm_Chr1g0367191	--	--	--	--	--	--	-2.59089	5e-05	0.00322834	uncharacterized LOC112182712	uncharacterized protein LOC112182712 [Rosa chinensis]	--	--
RchiOBHm_Chr1g0367731	-1.50403	0.0016	0.0457597	--	--	--	--	--	--	elicitor-responsive protein 1	elicitor-responsive protein 1 [Rosa chinensis]	F:GO:0005515	--
RchiOBHm_Chr1g0368491	--	--	--	--	--	--	3.31979	5e-05	0.00322834	ultraviolet-B receptor UVR8	ultraviolet-B receptor UVR8 isoform X1 [Rosa chinensis]	--	--
RchiOBHm_Chr1g0369681	-1.80842	5e-05	0.00322834	--	--	--	-4.02041	5e-05	0.00322834	nematode resistance protein-like HSPRO2	nematode resistance protein-like HSPRO2 [Rosa chinensis]	P:GO:0006952	--
RchiOBHm_Chr1g0370011	-3.83333	5e-05	0.00322834	-3.85632	5e-05	0.00322834	--	--	--	chlorophyll a-b binding protein CP29.3, chloroplastic	chlorophyll a-b binding protein CP29.3, chloroplastic [Rosa chinensis]	C:GO:0016020	K08915 map00196 Photosynthesis - antenna proteins
RchiOBHm_Chr1g0370021	--	--	--	1.97701	5e-05	0.00322834	2.09781	5e-05	0.00322834	high mobility group B protein 1	putative chromatin remodeling & transcriptional activation HMG family [Rosa chinensis]	--	K10802 map03410 Base excision repair
RchiOBHm_Chr1g0370251	-2.56334	0.00095	0.0315944	--	--	--	-2.51242	0.00125	0.0385361	putative serine/threonine-protein kinase-like protein CCR3	putative serine/threonine-protein kinase-like protein CCR3 [Rosa chinensis]	F:GO:0005524; F:GO:0004672; P:GO:0006468	--
RchiOBHm_Chr1g0370371	--	--	--	--	--	--	2.15056	5e-05	0.00322834	protein SMAX1-LIKE 7	protein SMAX1-LIKE 7 [Rosa chinensis]	F:GO:0005524; P:GO:0019538	--
RchiOBHm_Chr1g0370391	--	--	--	--	--	--	-2.73742	5e-05	0.00322834	probable 2-oxoglutarate-dependent dioxygenase At5g05600	probable 2-oxoglutarate-dependent dioxygenase At5g05600 [Rosa chinensis]	F:GO:0016491; P:GO:0055114	--
RchiOBHm_Chr1g0370421	-2.70792	5e-05	0.00322834	-3.32717	5e-05	0.00322834	--	--	--	omega-3 fatty acid desaturase, chloroplastic	omega-3 fatty acid desaturase, chloroplastic [Rosa chinensis]	P:GO:0006629; P:GO:0055114	--
RchiOBHm_Chr1g0370481	--	--	--	--	--	--	-1.75137	0.00025	0.0115953	probable protein phosphatase 2C 25	putative protein-serine/threonine phosphatase [Rosa chinensis]	F:GO:0004722; F:GO:0003824; P:GO:0006470; F:GO:0043169	--
RchiOBHm_Chr1g0370661	-2.90839	5e-05	0.00322834	-2.4615	0.0006	0.0226208	-7.69669	5e-05	0.00322834	uncharacterized LOC112177044	uncharacterized protein LOC112177044 [Rosa chinensis]	--	--
RchiOBHm_Chr1g0371291	--	--	--	2.94983	0.00025	0.0115953	--	--	--	uncharacterized LOC112195720	uncharacterized protein LOC112195720 [Rosa chinensis]	--	--
RchiOBHm_Chr1g0371351	--	--	--	--	--	--	-3.78518	5e-05	0.00322834	protein EARLY RESPONSIVE TO DEHYDRATION 15-like	protein EARLY RESPONSIVE TO DEHYDRATION 15-like isoform X1 [Rosa chinensis]	--	--
RchiOBHm_Chr1g0371451	--	--	--	--	--	--	-2.77668	5e-05	0.00322834	amino acid transporter AVT6C-like	amino acid transporter AVT6C-like [Rosa chinensis]	--	--
RchiOBHm_Chr1g0372111	-3.19876	5e-05	0.00322834	-4.07691	5e-05	0.00322834	2.33074	5e-05	0.00322834	uncharacterized LOC112176426	uncharacterized protein LOC112176426 [Rosa chinensis]	F:GO:0003677; C:GO:0005634; F:GO:0008270	--
RchiOBHm_Chr1g0372131	-2.3395	5e-05	0.00322834	-3.52352	5e-05	0.00322834	--	--	--	expansin-A8	expansin-A8 [Rosa chinensis]	P:GO:0009664; C:GO:0005576	--
RchiOBHm_Chr1g0372171	-2.8543	0.00155	0.0447056	--	--	--	--	--	--	RING-H2 finger protein ATL74-like	RING-H2 finger protein ATL74-like [Rosa chinensis]	F:GO:0008270; F:GO:0005515	--
RchiOBHm_Chr1g0372181	-2.58896	0.0001	0.00572684	-2.1975	5e-05	0.00322834	3.30612	5e-05	0.00322834	probable chalcone--flavonone isomerase 3	hypothetical protein RchiOBHm_Chr1g0372181 [Rosa chinensis]	--	--
RchiOBHm_Chr1g0372231	-2.10681	5e-05	0.00322834	-1.6194	0.00025	0.0115953	--	--	--	uncharacterized LOC112194441	uncharacterized protein LOC112194441 [Rosa chinensis]	--	--
RchiOBHm_Chr1g0372331	--	--	--	-1.71943	0.00135	0.04063	--	--	--	probable LRR receptor-like serine/threonine-protein kinase IRK	probable LRR receptor-like serine/threonine-protein kinase IRK [Rosa chinensis]	F:GO:0005524; F:GO:0005515; F:GO:0004672; P:GO:0006468	--
RchiOBHm_Chr1g0373321	--	--	--	--	--	--	-3.8819	5e-05	0.00322834	protein ORANGE-GREEN, chloroplastic	protein ORANGE-GREEN, chloroplastic [Rosa chinensis]	F:GO:0031072; F:GO:0051082	--
RchiOBHm_Chr1g0373391	-1.84725	0.00065	0.0239894	--	--	--	--	--	--	putative glycine-rich cell wall structural protein 1	putative glycine-rich cell wall structural protein 1 [Rosa chinensis]	--	--
RchiOBHm_Chr1g0373631	--	--	--	--	--	--	-2.49493	5e-05	0.00322834	ethylene-responsive transcription factor ERF104-like	ethylene-responsive transcription factor ERF104-like [Rosa chinensis]	F:GO:0003677	--
RchiOBHm_Chr1g0373641	3.45787	5e-05	0.00322834	2.62208	5e-05	0.00322834	-2.19622	0.00095	0.0315944	ethylene-responsive transcription factor ERF107-like	ethylene-responsive transcription factor ERF107-like [Rosa chinensis]	F:GO:0003677	--
RchiOBHm_Chr1g0374261	-2.81204	5e-05	0.00322834	-3.23537	5e-05	0.00322834	--	--	--	peroxisomal membrane protein 11B	peroxisomal membrane protein 11B isoform X1 [Rosa chinensis]	P:GO:0016559; C:GO:0005779	K13352 map04146 Peroxisome
RchiOBHm_Chr1g0374291	--	--	--	--	--	--	2.36252	0.00065	0.0239894	probable LRR receptor-like serine/threonine-protein kinase At3g47570	probable LRR receptor-like serine/threonine-protein kinase At3g47570 [Rosa chinensis]	F:GO:0005524; F:GO:0004672; P:GO:0006468	--
RchiOBHm_Chr1g0374411	-4.79739	0.0001	0.00572684	-3.54455	0.00035	0.015033	--	--	--	heat shock 22 kDa protein, mitochondrial	heat shock 22 kDa protein, mitochondrial [Rosa chinensis]	--	K13993 map04141 Protein processing in endoplasmic reticulum
RchiOBHm_Chr1g0374461	--	--	--	--	--	--	-1.77791	0.00145	0.0426478	BAG family molecular chaperone regulator 7	BAG family molecular chaperone regulator 7 [Rosa chinensis]	F:GO:0005515	--
RchiOBHm_Chr1g0374671	--	--	--	4.47382	5e-05	0.00322834	--	--	--	21 kDa protein-like	21 kDa protein-like [Rosa chinensis]	F:GO:0004857	--
RchiOBHm_Chr1g0374691	4.72884	5e-05	0.00322834	4.89535	5e-05	0.00322834	-3.36936	5e-05	0.00322834	21 kDa protein-like	21 kDa protein-like [Rosa chinensis]	F:GO:0004857	--
RchiOBHm_Chr1g0374721	--	--	--	--	--	--	-1.69499	0.0008	0.027924	21 kDa protein	putative pectinesterase [Rosa chinensis]	F:GO:0004857	--
RchiOBHm_Chr1g0376581	-2.82372	5e-05	0.00322834	-3.25481	5e-05	0.00322834	--	--	--	uncharacterized LOC112172496	uncharacterized protein LOC112172496 [Rosa chinensis]	--	--
RchiOBHm_Chr1g0376711	-3.92418	0.00045	0.0182298	-3.16903	5e-05	0.00322834	-4.40435	0.0003	0.0134078	protein DETOXIFICATION 49	protein DETOXIFICATION 49 [Rosa chinensis]	P:GO:0006855; P:GO:0055085; F:GO:0015297; C:GO:0016020; F:GO:0015238	--
RchiOBHm_Chr1g0377641	1.61073	0.0016	0.0457597	--	--	--	--	--	--	tripeptidyl-peptidase 2	tripeptidyl-peptidase 2 isoform X1 [Rosa chinensis]	P:GO:0006508; F:GO:0004252	--
RchiOBHm_Chr1g0377981	--	--	--	2.00844	0.0011	0.0351307	--	--	--	probable mediator of RNA polymerase II transcription subunit 36b	probable mediator of RNA polymerase II transcription subunit 36b [Rosa chinensis]	F:GO:0003723; P:GO:0008033; F:GO:0008168; P:GO:0006364	K14563 map03008 Ribosome biogenesis in eukaryotes
RchiOBHm_Chr1g0378001	2.11214	5e-05	0.00322834	2.55104	5e-05	0.00322834	--	--	--	protein DETOXIFICATION 35	protein DETOXIFICATION 35 [Rosa chinensis]	P:GO:0006855; P:GO:0055085; F:GO:0015297; C:GO:0016020; F:GO:0015238	--
RchiOBHm_Chr1g0378281	--	--	--	--	--	--	1.64402	0.0007	0.0253552	beta-carotene hydroxylase 2, chloroplastic-like	beta-carotene hydroxylase 2, chloroplastic-like [Rosa chinensis]	F:GO:0005506; F:GO:0016491; P:GO:0055114; P:GO:0006633	K15746 map00906 Carotenoid biosynthesis
RchiOBHm_Chr1g0378471	-1.99992	0.0002	0.00978718	-1.87189	0.00045	0.0182298	--	--	--	uncharacterized protein PAM68-like	uncharacterized protein PAM68-like [Rosa chinensis]	--	--
RchiOBHm_Chr1g0378611	--	--	--	--	--	--	-2.57542	0.0005	0.0197317	uncharacterized LOC112181901	hypothetical protein RchiOBHm_Chr1g0378611 [Rosa chinensis]	--	--
RchiOBHm_Chr1g0379591	--	--	--	-1.66901	0.00135	0.04063	--	--	--	probable membrane-associated kinase regulator 6	probable membrane-associated kinase regulator 6 [Rosa chinensis]	--	--
RchiOBHm_Chr1g0379601	-1.94834	0.0009	0.0303727	--	--	--	-4.97815	5e-05	0.00322834	G-type lectin S-receptor-like serine/threonine-protein kinase At5g24080	G-type lectin S-receptor-like serine/threonine-protein kinase At5g24080 [Rosa chinensis]	F:GO:0005524; P:GO:0048544; F:GO:0004672; P:GO:0006468; F:GO:0004674	--
RchiOBHm_Chr1g0380121	-2.73814	0.0006	0.0226208	--	--	--	--	--	--	probable WRKY transcription factor 53	putative transcription factor WRKY family [Rosa chinensis]	F:GO:0043565	--
RchiOBHm_Chr1g0380131	--	--	--	-2.10757	0.0001	0.00572684	--	--	--	RNA polymerase sigma factor sigE, chloroplastic/mitochondrial	RNA polymerase sigma factor sigE, chloroplastic/mitochondrial [Rosa chinensis]	F:GO:0003677; F:GO:0016987	--
RchiOBHm_Chr1g0380511	--	--	--	-1.76134	0.0004	0.0166112	--	--	--	soluble starch synthase 1, chloroplastic/amyloplastic	putative starch synthase [Rosa chinensis]	F:GO:0004373	K00703 map00500 Starch and sucrose metabolism
RchiOBHm_Chr1g0380911	--	--	--	-1.75794	0.00075	0.026584	--	--	--	uncharacterized LOC112183399	uncharacterized protein LOC112183399 [Rosa chinensis]	F:GO:0008080	--
RchiOBHm_Chr1g0381041	-2.93461	0.0001	0.00572684	-1.95544	0.00025	0.0115953	-2.36742	5e-05	0.00322834	probable protein phosphatase 2C 8	probable protein phosphatase 2C 8 [Rosa chinensis]	F:GO:0004722; F:GO:0003824; P:GO:0006470; F:GO:0043169	K14497 map04016 MAPK signaling pathway - plant
RchiOBHm_Chr1g0381051	--	--	--	-1.91431	0.0001	0.00572684	-2.11171	0.0001	0.00572684	spermine synthase	spermine synthase [Rosa chinensis]	F:GO:0003824	K00797 map00270 Cysteine and methionine metabolism
RchiOBHm_Chr1g0382431	2.1571	5e-05	0.00322834	2.95677	5e-05	0.00322834	--	--	--	homeobox-leucine zipper protein ATHB-12-like	putative transcription factor Homobox-WOX family [Rosa chinensis]	F:GO:0003677; F:GO:0043565	--
RchiOBHm_Chr1g0382681	1.99577	0.0001	0.00572684	1.88743	0.00035	0.015033	--	--	--	growth-regulating factor 4	growth-regulating factor 4 [Rosa chinensis]	F:GO:0005524; C:GO:0005634	--
RchiOBHm_Chr1g0382891	--	--	--	2.05943	5e-05	0.00322834	--	--	--	NDR1/HIN1-like protein 26	NDR1/HIN1-like protein 26 [Rosa chinensis]	--	--
RchiOBHm_Chr1g0382921	--	--	--	--	--	--	-3.27021	0.00085	0.0292322	uncharacterized LOC112184664	uncharacterized protein LOC112184664 [Rosa chinensis]	F:GO:0008270; F:GO:0005515	--
RchiOBHm_Chr1g0383071	--	--	--	--	--	--	-2.91925	0.00055	0.0211442	heavy metal-associated isoprenylated plant protein 9	putative heavy metal-associated domain, HMA [Rosa chinensis]	F:GO:0046872; P:GO:0030001	--
RchiOBHm_Chr1g0383111	--	--	--	--	--	--	1.75238	0.00085	0.0292322	uncharacterized calcium-binding protein At1g02270	uncharacterized calcium-binding protein At1g02270 isoform X1 [Rosa chinensis]	--	--
RchiOBHm_Chr1g0383771	-2.00805	0.00105	0.0339528	-2.47946	0.00015	0.00788832	--	--	--	uncharacterized LOC112177147	uncharacterized protein LOC112177147 [Rosa chinensis]	F:GO:0005515; F:GO:0005506	--
RchiOBHm_Chr1g0384031	--	--	--	1.953	0.00025	0.0115953	--	--	--	laccase-15-like	laccase-15-like [Rosa chinensis]	P:GO:0046274; F:GO:0005507; F:GO:0016491; C:GO:0048046; P:GO:0055114; F:GO:0052716	--
RchiOBHm_Chr1g0384191	1.77029	0.00135	0.04063	--	--	--	--	--	--	pentatricopeptide repeat-containing protein At5g27270	pentatricopeptide repeat-containing protein At5g27270 [Rosa chinensis]	F:GO:0005515	--
RchiOBHm_Chr1g0384231	--	--	--	--	--	--	2.74133	5e-05	0.00322834	4-coumarate--CoA ligase 2	4-coumarate--CoA ligase 2 [Rosa chinensis]	F:GO:0003824; P:GO:0008152	K01904 map00130 Ubiquinone and other terpenoid-quinone biosynthesis
RchiOBHm_Chr1g0384681	-2.01751	0.00015	0.00788832	-1.72387	0.001	0.0328082	--	--	--	probable folate-biopterin transporter 7	probable folate-biopterin transporter 7 [Rosa chinensis]	C:GO:0016021; P:GO:0006810	--
RchiOBHm_Chr2g0084721	-1.97034	0.0009	0.0303727	-2.24292	5e-05	0.00322834	--	--	--	2-alkenal reductase (NADP(+)-dependent)-like	2-alkenal reductase (NADP(+)-dependent)-like [Rosa chinensis]	F:GO:0016491; P:GO:0055114	--
RchiOBHm_Chr2g0084971	--	--	--	--	--	--	1.78346	0.00095	0.0315944	formin-like protein 2	formin-like protein 2 [Rosa chinensis]	--	--
RchiOBHm_Chr2g0085151	--	--	--	--	--	--	-2.00216	0.00155	0.0447056	probable 2-oxoglutarate-dependent dioxygenase AOP1	probable 2-oxoglutarate-dependent dioxygenase AOP1 [Rosa chinensis]	F:GO:0016491; P:GO:0055114	--
RchiOBHm_Chr2g0085541	--	--	--	--	--	--	2.71031	0.00075	0.026584	serine carboxypeptidase 24	serine carboxypeptidase 24 isoform X2 [Rosa chinensis]	P:GO:0006508; F:GO:0004185	--
RchiOBHm_Chr2g0085771	-1.51802	0.00135	0.04063	-1.86857	0.00015	0.00788832	--	--	--	omega-6 fatty acid desaturase, chloroplastic	omega-6 fatty acid desaturase, chloroplastic [Rosa chinensis]	P:GO:0006629	--
RchiOBHm_Chr2g0086161	--	--	--	2.45987	5e-05	0.00322834	--	--	--	class V chitinase-like	class V chitinase-like [Rosa chinensis]	F:GO:0004568; P:GO:0005975; P:GO:0006032	K01183 map00520 Amino sugar and nucleotide sugar metabolism
RchiOBHm_Chr2g0086511	--	--	--	--	--	--	-2.06761	5e-05	0.00322834	uncharacterized LOC112184886	hypothetical protein RchiOBHm_Chr2g0086511 [Rosa chinensis]	--	--
RchiOBHm_Chr2g0086781	-2.78538	5e-05	0.00322834	-2.65039	5e-05	0.00322834	1.98121	0.0002	0.00978718	probable protein phosphatase 2C 27	probable protein phosphatase 2C 27 [Rosa chinensis]	F:GO:0004722; F:GO:0003824; P:GO:0006470; F:GO:0043169	--
RchiOBHm_Chr2g0086811	-3.0415	5e-05	0.00322834	-3.30116	5e-05	0.00322834	-2.29087	0.00075	0.026584	uncharacterized LOC112189920	hypothetical protein RchiOBHm_Chr2g0086811 [Rosa chinensis]	--	--
RchiOBHm_Chr2g0086901	--	--	--	--	--	--	1.68602	0.00175	0.0488412	uncharacterized methyltransferase At2g41040, chloroplastic-like	uncharacterized methyltransferase At2g41040, chloroplastic-like [Rosa chinensis]	P:GO:0008152; F:GO:0008168	--
RchiOBHm_Chr2g0086961	--	--	--	--	--	--	-2.66382	5e-05	0.00322834	uncharacterized LOC112187562	hypothetical protein RchiOBHm_Chr2g0086961 [Rosa chinensis]	--	--
RchiOBHm_Chr2g0087081	2.21194	5e-05	0.00322834	--	--	--	--	--	--	F-box/LRR-repeat protein 13-like	F-box/LRR-repeat protein 13-like [Rosa chinensis]	F:GO:0005515	--
RchiOBHm_Chr2g0088011	-1.80828	0.00075	0.026584	--	--	--	-2.07896	5e-05	0.00322834	blue copper protein-like	blue copper protein-like [Rosa chinensis]	F:GO:0009055	--
RchiOBHm_Chr2g0088141	-2.09342	0.00125	0.0385361	--	--	--	--	--	--	thylakoid lumenal 16.5 kDa protein, chloroplastic	thylakoid lumenal 16.5 kDa protein, chloroplastic [Rosa chinensis]	--	--
RchiOBHm_Chr2g0088211	--	--	--	--	--	--	1.97522	0.0001	0.00572684	uncharacterized LOC112189997	uncharacterized protein LOC112189997 [Rosa chinensis]	F:GO:0005515	--
RchiOBHm_Chr2g0088581	--	--	--	--	--	--	1.82504	0.0007	0.0253552	beta-glucuronosyltransferase GlcAT14B-like	beta-glucuronosyltransferase GlcAT14B-like [Rosa chinensis]	F:GO:0008375; C:GO:0016020	--
RchiOBHm_Chr2g0088721	-4.19942	0.0004	0.0166112	-4.91586	0.0014	0.0416089	2.19931	5e-05	0.00322834	adenine nucleotide transporter BT1, chloroplastic/mitochondrial-like	adenine nucleotide transporter BT1, chloroplastic/mitochondrial-like [Rosa chinensis]	P:GO:0055085	--
RchiOBHm_Chr2g0089081	--	--	--	-2.7543	0.00095	0.0315944	--	--	--	uncharacterized LOC112190065	uncharacterized protein LOC112190065 isoform X1 [Rosa chinensis]	C:GO:0030286; P:GO:0007017	--
RchiOBHm_Chr2g0089121	--	--	--	--	--	--	3.533	5e-05	0.00322834	uncharacterized LOC112187279	uncharacterized protein LOC112187279 [Rosa chinensis]	P:GO:0006807; P:GO:0008152; P:GO:0006520	--
RchiOBHm_Chr2g0089161	--	--	--	-1.9689	0.00105	0.0339528	--	--	--	pentatricopeptide repeat-containing protein At1g08070, chloroplastic-like	pentatricopeptide repeat-containing protein At1g08070, chloroplastic-like [Rosa chinensis]	F:GO:0005515	--
RchiOBHm_Chr2g0089261	--	--	--	2.44051	0.0001	0.00572684	--	--	--	protein arginine N-methyltransferase PRMT10	protein arginine N-methyltransferase PRMT10 [Rosa chinensis]	F:GO:0008168; P:GO:0006479	--
RchiOBHm_Chr2g0089421	2.02491	0.0013	0.0396058	--	--	--	--	--	--	potassium channel AKT1	potassium channel AKT1 [Rosa chinensis]	P:GO:0006813; F:GO:0005249; F:GO:0005216; P:GO:0006811; F:GO:0005515; P:GO:0055085; C:GO:0016020	--
RchiOBHm_Chr2g0090071	--	--	--	--	--	--	-2.08985	0.0003	0.0134078	dynein light chain 1, cytoplasmic-like	dynein light chain 1, cytoplasmic-like [Rosa chinensis]	C:GO:0030286; P:GO:0007017	--
RchiOBHm_Chr2g0090191	-1.76333	0.00105	0.0339528	--	--	--	--	--	--	chloroplast processing peptidase	chloroplast processing peptidase [Rosa chinensis]	P:GO:0006508; C:GO:0016020; F:GO:0008236; C:GO:0016021	K03100 map03060 Protein export
RchiOBHm_Chr2g0090251	--	--	--	-1.93516	0.0003	0.0134078	--	--	--	pentatricopeptide repeat-containing protein At5g21222-like	pentatricopeptide repeat-containing protein At5g25630-like isoform X1 [Rosa chinensis]	F:GO:0005515	--
RchiOBHm_Chr2g0090301	--	--	--	--	--	--	1.62387	0.00135	0.04063	probable chlorophyll(ide) b reductase NYC1, chloroplastic	probable chlorophyll(ide) b reductase NYC1, chloroplastic [Rosa chinensis]	--	K13606 map00860 Porphyrin metabolism
RchiOBHm_Chr2g0091421	1.82088	5e-05	0.00322834	1.72779	0.00015	0.00788832	-1.95773	0.0001	0.00572684	sugar transport protein 14	sugar transport protein 14 [Rosa chinensis]	F:GO:0022891; P:GO:0055085; F:GO:0022857; C:GO:0016020; C:GO:0016021; F:GO:0005215	--
RchiOBHm_Chr2g0092041	-3.22391	0.0009	0.0303727	--	--	--	--	--	--	probable pectinesterase 53	probable pectinesterase 53 [Rosa chinensis]	C:GO:0005618; P:GO:0042545; F:GO:0030599	K01051 map00040 Pentose and glucuronate interconversions
RchiOBHm_Chr2g0092151	--	--	--	--	--	--	-5.73472	5e-05	0.00322834	uncharacterized LOC112187436	uncharacterized protein LOC112187436 [Rosa chinensis]	--	--
RchiOBHm_Chr2g0092241	--	--	--	--	--	--	1.67506	0.0016	0.0457597	uncharacterized LOC112183992	uncharacterized protein LOC112183992 [Rosa chinensis]	--	--
RchiOBHm_Chr2g0092301	--	--	--	--	--	--	1.60206	0.0012	0.0373427	nudix hydrolase 8-like	putative hydrolase [Rosa chinensis]	F:GO:0016787	--
RchiOBHm_Chr2g0092951	-1.85522	5e-05	0.00322834	--	--	--	-1.46345	0.00165	0.0467628	uncharacterized LOC112187939	uncharacterized protein LOC112187939 [Rosa chinensis]	--	--
RchiOBHm_Chr2g0093071	--	--	--	--	--	--	-1.99398	5e-05	0.00322834	transcription factor MYBS3-like	transcription factor MYBS3-like [Rosa chinensis]	F:GO:0003676; F:GO:0003677; F:GO:0008270	--
RchiOBHm_Chr2g0093301	3.8675	0.0001	0.00572684	3.71763	0.0002	0.00978718	-3.78592	0.0003	0.0134078	beta-galactosidase-like	beta-galactosidase-like [Rosa chinensis]	P:GO:0005975	--
RchiOBHm_Chr2g0093861	--	--	--	--	--	--	2.00504	0.0006	0.0226208	UDP-glycosyltransferase 91C1-like	UDP-glycosyltransferase 91C1-like [Rosa chinensis]	P:GO:0008152	--
RchiOBHm_Chr2g0094021	-2.85827	5e-05	0.00322834	-1.83118	0.00075	0.026584	-2.04733	0.00055	0.0211442	protein ALP1-like	protein ALP1-like [Rosa chinensis]	--	--
RchiOBHm_Chr2g0094051	--	--	--	--	--	--	-2.37161	5e-05	0.00322834	protein phosphatase 2C 77-like	protein phosphatase 2C 77-like [Rosa chinensis]	F:GO:0004722; F:GO:0003824; P:GO:0006470; F:GO:0043169	K14497 map04016 MAPK signaling pathway - plant
RchiOBHm_Chr2g0094631	-6.07136	0.0002	0.00978718	-4.65841	5e-05	0.00322834	-4.50795	5e-05	0.00322834	12-oxophytodienoate reductase 3-like	12-oxophytodienoate reductase 3-like [Rosa chinensis]	F:GO:0010181; F:GO:0016491; F:GO:0003824; P:GO:0055114	K05894 map00592 alpha-Linolenic acid metabolism
RchiOBHm_Chr2g0094741	--	--	--	-2.14703	0.00015	0.00788832	--	--	--	auxin-binding protein ABP19a	auxin-binding protein ABP19a [Rosa chinensis]	F:GO:0030145; F:GO:0045735	--
RchiOBHm_Chr2g0094751	--	--	--	-3.7746	5e-05	0.00322834	--	--	--	auxin-binding protein ABP19a-like	auxin-binding protein ABP19a-like [Rosa chinensis]	F:GO:0030145; F:GO:0045735	--
RchiOBHm_Chr2g0094921	--	--	--	--	--	--	-1.60791	0.0013	0.0396058	uncharacterized LOC112187874	uncharacterized protein LOC112187874 [Rosa chinensis]	--	--
RchiOBHm_Chr2g0094941	--	--	--	--	--	--	4.88145	5e-05	0.00322834	flavonoid 3'-monooxygenase-like	flavonoid 3'-monooxygenase-like [Rosa chinensis]	F:GO:0005506; P:GO:0055114; F:GO:0020037	K20623 map00905 Brassinosteroid biosynthesis
RchiOBHm_Chr2g0095461	--	--	--	-1.93852	0.0012	0.0373427	--	--	--	photosystem I chlorophyll a/b-binding protein 6, chloroplastic	photosystem I chlorophyll a/b-binding protein 6, chloroplastic [Rosa chinensis]	C:GO:0016020	K08908 map00196 Photosynthesis - antenna proteins
RchiOBHm_Chr2g0095501	-1.54942	0.0016	0.0457597	--	--	--	--	--	--	uncharacterized LOC112190311	uncharacterized protein LOC112190311 [Rosa chinensis]	--	--
RchiOBHm_Chr2g0095761	--	--	--	-3.86528	0.0005	0.0197317	--	--	--	uncharacterized LOC112187700	uncharacterized protein LOC112187700 [Rosa chinensis]	--	--
RchiOBHm_Chr2g0095781	-2.80527	5e-05	0.00322834	-2.82647	5e-05	0.00322834	--	--	--	peroxiredoxin Q, chloroplastic	putative peroxiredoxin [Rosa chinensis]	F:GO:0016209; F:GO:0016491; P:GO:0055114; P:GO:0045454	--
RchiOBHm_Chr2g0096441	--	--	--	-3.01208	0.00175	0.0488412	--	--	--	probable pectinesterase/pectinesterase inhibitor 12	probable pectinesterase/pectinesterase inhibitor 12 isoform X1 [Rosa chinensis]	F:GO:0004857; C:GO:0005618; P:GO:0042545; F:GO:0030599	K01051 map00040 Pentose and glucuronate interconversions
RchiOBHm_Chr2g0096611	--	--	--	2.07469	0.00105	0.0339528	-2.47176	5e-05	0.00322834	2-oxoglutarate-dependent dioxygenase DAO-like	2-oxoglutarate-dependent dioxygenase DAO-like [Rosa chinensis]	F:GO:0016491; P:GO:0055114	--
RchiOBHm_Chr2g0097351	--	--	--	-5.90411	0.0013	0.0396058	--	--	--	dehydrodolichyl diphosphate synthase 8-like	dehydrodolichyl diphosphate synthase 8-like [Rosa chinensis]	--	K11778 map00900 Terpenoid backbone biosynthesis
RchiOBHm_Chr2g0097821	--	--	--	--	--	--	-2.54505	5e-05	0.00322834	endochitinase-like	endochitinase-like [Rosa chinensis]	F:GO:0004568; P:GO:0016998; P:GO:0005975; F:GO:0008061; P:GO:0006032	K20547 map00520 Amino sugar and nucleotide sugar metabolism
RchiOBHm_Chr2g0097951	--	--	--	--	--	--	-2.07236	0.0001	0.00572684	lysine histidine transporter-like 8	lysine histidine transporter-like 8 [Rosa chinensis]	--	--
RchiOBHm_Chr2g0098341	-3.41084	5e-05	0.00322834	-2.33702	5e-05	0.00322834	-2.61813	5e-05	0.00322834	uncharacterized LOC112189087	uncharacterized protein LOC112189087 [Rosa chinensis]	P:GO:0055114; F:GO:0033743	--
RchiOBHm_Chr2g0098921	--	--	--	-4.71697	0.0002	0.00978718	--	--	--	GDSL esterase/lipase EXL3-like	GDSL esterase/lipase EXL3-like [Rosa chinensis]	--	--
RchiOBHm_Chr2g0099311	-3.36241	0.0011	0.0351307	--	--	--	--	--	--	thaumatin-like protein 1b	putative thaumatin [Rosa chinensis]	--	--
RchiOBHm_Chr2g0099371	--	--	--	--	--	--	-3.8997	5e-05	0.00322834	chaperone protein dnaJ 11, chloroplastic	chaperone protein dnaJ 11, chloroplastic [Rosa chinensis]	--	--
RchiOBHm_Chr2g0099421	--	--	--	--	--	--	2.97774	5e-05	0.00322834	naringenin,2-oxoglutarate 3-dioxygenase	naringenin,2-oxoglutarate 3-dioxygenase [Rosa chinensis]	F:GO:0016491; P:GO:0055114	K00475 map00941 Flavonoid biosynthesis
RchiOBHm_Chr2g0099691	--	--	--	-2.62454	5e-05	0.00322834	--	--	--	kinesin-like protein KIN-7E	kinesin-like protein KIN-7E [Rosa chinensis]	F:GO:0005524; F:GO:0003777; P:GO:0007018; F:GO:0008017	--
RchiOBHm_Chr2g0099771	--	--	--	-2.25428	0.00045	0.0182298	--	--	--	B-box zinc finger protein 19-like	B-box zinc finger protein 19-like [Rosa chinensis]	F:GO:0008270; C:GO:0005622	--
RchiOBHm_Chr2g0100171	--	--	--	-2.23901	5e-05	0.00322834	--	--	--	beta-galactosidase 3	beta-galactosidase 3 [Rosa chinensis]	P:GO:0005975; F:GO:0030246	--
RchiOBHm_Chr2g0100551	-2.65737	0.0011	0.0351307	--	--	--	-5.63021	0.00045	0.0182298	cold-shock protein CS120-like	putative dehydrin [Rosa chinensis]	P:GO:0006950; P:GO:0009415	--
RchiOBHm_Chr2g0100551	-2.65737	0.0011	0.0351307	--	--	--	-5.25095	5e-05	0.00322834	cold-shock protein CS120-like	putative dehydrin [Rosa chinensis]	P:GO:0006950; P:GO:0009415	--
RchiOBHm_Chr2g0100801	-2.9544	0.00035	0.015033	-3.47365	0.0001	0.00572684	--	--	--	AAA-ATPase At2g18193-like	AAA-ATPase At2g18193-like [Rosa chinensis]	F:GO:0005524	--
RchiOBHm_Chr2g0100961	--	--	--	--	--	--	-1.88477	0.00025	0.0115953	GTPase ERA-like, chloroplastic	GTPase ERA-like, chloroplastic [Rosa chinensis]	F:GO:0005525; F:GO:0003723; C:GO:0005622	--
RchiOBHm_Chr2g0101081	-1.73104	0.0004	0.0166112	-2.09349	5e-05	0.00322834	--	--	--	pheophytinase, chloroplastic	pheophytinase, chloroplastic [Rosa chinensis]	--	--
RchiOBHm_Chr2g0101241	--	--	--	--	--	--	-2.66223	5e-05	0.00322834	tubby-like F-box protein 5	tubby-like F-box protein 5 [Rosa chinensis]	F:GO:0005515	--
RchiOBHm_Chr2g0101281	--	--	--	--	--	--	2.01338	0.00015	0.00788832	protein RADIALIS-like 5	PREDICTED: protein RADIALIS-like 4 [Fragaria vesca subsp. vesca]	F:GO:0003677	--
RchiOBHm_Chr2g0101761	1.81915	0.0006	0.0226208	2.16011	0.00015	0.00788832	1.79556	0.00075	0.026584	SCARECROW-LIKE protein 7	SCARECROW-LIKE protein 7 [Rosa chinensis]	--	--
RchiOBHm_Chr2g0101791	--	--	--	--	--	--	-1.83391	0.00055	0.0211442	cytochrome P450 90B1	cytochrome P450 90B1 [Rosa chinensis]	F:GO:0005506; P:GO:0055114; F:GO:0020037	K09587 map00905 Brassinosteroid biosynthesis
RchiOBHm_Chr2g0101891	-2.46766	0.0002	0.00978718	-1.97986	0.00085	0.0292322	--	--	--	uncharacterized LOC112188808	uncharacterized protein LOC112188808 [Rosa chinensis]	--	--
RchiOBHm_Chr2g0101941	-2.71889	5e-05	0.00322834	-1.78953	0.0006	0.0226208	--	--	--	uncharacterized LOC112186544	uncharacterized protein LOC112186544 [Rosa chinensis]	--	--
RchiOBHm_Chr2g0102811	-2.94953	0.00055	0.0211442	--	--	--	--	--	--	probable galacturonosyltransferase-like 1	probable galacturonosyltransferase-like 1 [Rosa chinensis]	--	--
RchiOBHm_Chr2g0102821	--	--	--	-1.95796	0.00035	0.015033	--	--	--	probable vacuolar amino acid transporter YPQ2	probable vacuolar amino acid transporter YPQ2 [Rosa chinensis]	--	--
RchiOBHm_Chr2g0103071	--	--	--	-2.78833	0.00035	0.015033	--	--	--	STS14 protein-like	STS14 protein-like [Rosa chinensis]	--	--
RchiOBHm_Chr2g0103251	-1.532	0.00175	0.0488412	--	--	--	--	--	--	uncharacterized LOC112188486	uncharacterized protein LOC112188486 [Rosa chinensis]	--	--
RchiOBHm_Chr2g0103791	--	--	--	--	--	--	-1.92345	0.00035	0.015033	salicylic acid-binding protein 2-like	salicylic acid-binding protein 2-like [Rosa chinensis]	--	K20802 map00460 Cyanoamino acid metabolism
RchiOBHm_Chr2g0104671	1.76368	0.00025	0.0115953	1.30861	0.00585	0.0114238	--	--	--	serine/threonine-protein kinase SRK2I	serine/threonine-protein kinase SRK2I isoform X1 [Rosa chinensis]	F:GO:0005524; F:GO:0004672; P:GO:0006468	K14498 map04016 MAPK signaling pathway - plant
RchiOBHm_Chr2g0104701	--	--	--	--	--	--	-3.19152	5e-05	0.00322834	transcription factor HHO5-like	transcription factor HHO5-like isoform X1 [Rosa chinensis]	F:GO:0003677	--
RchiOBHm_Chr2g0104991	1.66879	0.00175	0.0488412	2.54094	5e-05	0.00322834	1.8207	0.00105	0.0339528	3-ketodihydrosphingosine reductase	3-ketodihydrosphingosine reductase [Rosa chinensis]	--	--
RchiOBHm_Chr2g0105701	-2.14248	0.00015	0.00788832	-2.70547	5e-05	0.00322834	--	--	--	zeaxanthin epoxidase, chloroplastic	zeaxanthin epoxidase, chloroplastic [Rosa chinensis]	F:GO:0071949; C:GO:0009507; F:GO:0005515; F:GO:0009540; F:GO:0016491; C:GO:0016020; P:GO:0009688; P:GO:0055114	K09838 map00906 Carotenoid biosynthesis
RchiOBHm_Chr2g0105711	--	--	--	--	--	--	2.39767	5e-05	0.00322834	uncharacterized LOC112189654	uncharacterized protein LOC112189654 [Rosa chinensis]	--	--
RchiOBHm_Chr2g0105831	-5.12567	5e-05	0.00322834	-6.03821	5e-05	0.00322834	--	--	--	mitogen-activated protein kinase kinase kinase 17-like	putative mitogen-activated protein kinase kinase kinase STE-STE11 family [Rosa chinensis]	F:GO:0005524; F:GO:0004672; P:GO:0006468	--
RchiOBHm_Chr2g0105911	--	--	--	--	--	--	2.34791	5e-05	0.00322834	probable serine/threonine-protein kinase At1g01540	probable serine/threonine-protein kinase At1g01540 [Rosa chinensis]	F:GO:0005524; F:GO:0004672; P:GO:0006468	--
RchiOBHm_Chr2g0106111	-3.79864	0.00015	0.00788832	-4.49445	0.00025	0.0115953	--	--	--	uncharacterized acetyltransferase At3g50280-like	uncharacterized acetyltransferase At3g50280-like [Rosa chinensis]	--	--
RchiOBHm_Chr2g0106441	-2.50572	0.0014	0.0416089	-4.24439	0.00065	0.0239894	--	--	--	uncharacterized acetyltransferase At3g50280-like	uncharacterized acetyltransferase At3g50280-like [Rosa chinensis]	--	--
RchiOBHm_Chr2g0107231	1.86055	0.00055	0.0211442	--	--	--	--	--	--	uncharacterized LOC112187518	uncharacterized protein LOC112187518 [Rosa chinensis]	F:GO:0005515	--
RchiOBHm_Chr2g0107241	-2.34343	5e-05	0.00322834	-2.89303	5e-05	0.00322834	--	--	--	lysine-rich arabinogalactan protein 18	lysine-rich arabinogalactan protein 18 [Rosa chinensis]	--	--
RchiOBHm_Chr2g0107321	-2.11716	0.00085	0.0292322	--	--	--	--	--	--	uncharacterized LOC112189314	uncharacterized protein LOC112189314 [Rosa chinensis]	--	--
RchiOBHm_Chr2g0107351	--	--	--	-1.89844	0.00015	0.00788832	--	--	--	protein CONSERVED IN THE GREEN LINEAGE AND DIATOMS 27, chloroplastic	protein CONSERVED IN THE GREEN LINEAGE AND DIATOMS 27, chloroplastic isoform X1 [Rosa chinensis]	--	--
RchiOBHm_Chr2g0107461	--	--	--	--	--	--	-2.02365	0.00015	0.00788832	ribonuclease III domain-containing protein RNC1, chloroplastic	putative ribonuclease III [Rosa chinensis]	F:GO:0004525; P:GO:0006396	--
RchiOBHm_Chr2g0107561	--	--	--	--	--	--	-1.74834	0.0007	0.0253552	LOB domain-containing protein 38-like	LOB domain-containing protein 38-like [Rosa chinensis]	--	--
RchiOBHm_Chr2g0108881	--	--	--	-1.91725	0.00155	0.0447056	--	--	--	squalene epoxidase 3-like	squalene epoxidase 3-like [Rosa chinensis]	F:GO:0004506; F:GO:0050660; F:GO:0016491; C:GO:0016021; P:GO:0055114	--
RchiOBHm_Chr2g0109071	-1.56665	0.00065	0.0239894	-1.53731	0.00085	0.0292322	--	--	--	uncharacterized protein At3g49720-like	uncharacterized protein At3g49720-like [Rosa chinensis]	--	--
RchiOBHm_Chr2g0109241	--	--	--	2.137	0.0001	0.00572684	--	--	--	probable xyloglucan endotransglucosylase/hydrolase protein 6	probable xyloglucan endotransglucosylase/hydrolase protein 6 [Rosa chinensis]	P:GO:0005975; P:GO:0006073; C:GO:0005618; C:GO:0048046; F:GO:0016762; P:GO:0010411; P:GO:0042546	--
RchiOBHm_Chr2g0110741	2.7562	0.0008	0.027924	--	--	--	--	--	--	putative UDP-rhamnose:rhamnosyltransferase 1	putative UDP-rhamnose:rhamnosyltransferase 1 [Rosa chinensis]	P:GO:0008152	--
RchiOBHm_Chr2g0111171	--	--	--	--	--	--	-1.84654	0.00035	0.015033	nicotinamidase 1	nicotinamidase 1 [Rosa chinensis]	F:GO:0003824; P:GO:0008152	--
RchiOBHm_Chr2g0111191	--	--	--	--	--	--	1.99728	0.00035	0.015033	uncharacterized LOC112187097	uncharacterized protein LOC112187097 [Rosa chinensis]	--	--
RchiOBHm_Chr2g0111951	-4.24819	5e-05	0.00322834	-3.20905	5e-05	0.00322834	--	--	--	putative laccase-9	putative laccase-9 [Rosa chinensis]	P:GO:0046274; F:GO:0005507; F:GO:0016491; C:GO:0048046; P:GO:0055114; F:GO:0052716	--
RchiOBHm_Chr2g0112141	--	--	--	--	--	--	-2.01739	0.0005	0.0197317	RING-H2 finger protein ATL32-like	RING-H2 finger protein ATL32-like [Rosa chinensis]	F:GO:0008270; F:GO:0005515	--
RchiOBHm_Chr2g0112261	--	--	--	1.78162	0.00075	0.026584	--	--	--	uncharacterized LOC112187706	uncharacterized protein LOC112187706 [Rosa chinensis]	--	--
RchiOBHm_Chr2g0112381	-2.79076	5e-05	0.00322834	--	--	--	-3.77658	5e-05	0.00322834	uncharacterized LOC112186301	uncharacterized protein LOC112186301 [Rosa chinensis]	--	--
RchiOBHm_Chr2g0112441	--	--	--	-1.59231	0.0012	0.0373427	--	--	--	lanC-like protein GCL1	lanC-like protein GCL1 [Rosa chinensis]	F:GO:0003824	--
RchiOBHm_Chr2g0112481	--	--	--	2.00506	0.00075	0.026584	--	--	--	peroxidase 17-like	peroxidase 17-like [Rosa chinensis]	F:GO:0004601; P:GO:0006979; P:GO:0055114; F:GO:0020037	K00430 map00940 Phenylpropanoid biosynthesis
RchiOBHm_Chr2g0112721	--	--	--	-2.64086	5e-05	0.00322834	--	--	--	phospho-2-dehydro-3-deoxyheptonate aldolase 2, chloroplastic-like	phospho-2-dehydro-3-deoxyheptonate aldolase 2, chloroplastic-like [Rosa chinensis]	P:GO:0009073; F:GO:0003849	K01626 map00400 Phenylalanine, tyrosine and tryptophan biosynthesis
RchiOBHm_Chr2g0112791	-2.22763	5e-05	0.00322834	-2.35491	5e-05	0.00322834	--	--	--	haloacid dehalogenase-like hydrolase domain-containing protein At4g39970	haloacid dehalogenase-like hydrolase domain-containing protein At4g39970 [Rosa chinensis]	P:GO:0008152; F:GO:0016787	--
RchiOBHm_Chr2g0113161	-1.9578	0.00135	0.04063	--	--	--	--	--	--	50S ribosomal protein L29, chloroplastic	50S ribosomal protein L29, chloroplastic [Rosa chinensis]	F:GO:0003735; C:GO:0005840; C:GO:0005622; P:GO:0006412	K02904 map03010 Ribosome
RchiOBHm_Chr2g0114931	--	--	--	--	--	--	-2.43322	5e-05	0.00322834	PLAT domain-containing protein 3-like	PLAT domain-containing protein 3-like [Rosa chinensis]	F:GO:0005515	--
RchiOBHm_Chr2g0115241	-1.91136	0.00115	0.0362702	--	--	--	--	--	--	3-hydroxyacyl-[acyl-carrier-protein] dehydratase FabZ-like	uncharacterized protein LOC112183927 [Rosa chinensis]	F:GO:0016836; C:GO:0005737; P:GO:0006633	K02372 map00061 Fatty acid biosynthesis
RchiOBHm_Chr2g0115271	--	--	--	-2.88693	5e-05	0.00322834	3.0189	0.00055	0.0211442	inositol-3-phosphate synthase	inositol-3-phosphate synthase [Rosa chinensis]	F:GO:0004512; P:GO:0006021; P:GO:0008654	K01858 map00562 Inositol phosphate metabolism
RchiOBHm_Chr2g0115361	--	--	--	2.60559	0.0015	0.0436334	--	--	--	sulfate transporter 2.1	sulfate transporter 2.1 [Rosa chinensis]	P:GO:0008272; F:GO:0008271; P:GO:0055085; C:GO:0016020; C:GO:0016021; F:GO:0015116	--
RchiOBHm_Chr2g0115501	-1.86732	0.0009	0.0303727	-1.99464	0.00055	0.0211442	--	--	--	photosynthetic NDH subunit of lumenal location 4, chloroplastic	photosynthetic NDH subunit of lumenal location 4, chloroplastic isoform X1 [Rosa chinensis]	--	--
RchiOBHm_Chr2g0115671	--	--	--	--	--	--	-3.32099	5e-05	0.00322834	E3 ubiquitin-protein ligase RHA2B-like	putative transcription factor C2H2 family [Rosa chinensis]	F:GO:0008270; F:GO:0005515	--
RchiOBHm_Chr2g0116361	-2.87511	5e-05	0.00322834	-1.87848	0.0009	0.0303727	--	--	--	stress enhanced protein 2, chloroplastic	stress enhanced protein 2, chloroplastic [Rosa chinensis]	--	--
RchiOBHm_Chr2g0116631	--	--	--	-2.48437	5e-05	0.00322834	--	--	--	ABC transporter F family member 5-like	ABC transporter F family member 5-like [Rosa chinensis]	F:GO:0016887; F:GO:0005524	--
RchiOBHm_Chr2g0119391	--	--	--	-2.84286	0.00065	0.0239894	--	--	--	cytochrome P450 81E8-like	cytochrome P450 81E8-like [Rosa chinensis]	F:GO:0005506; P:GO:0055114; F:GO:0020037	K00512 map01100 Metabolic pathways
RchiOBHm_Chr2g0121921	--	--	--	-3.99554	5e-05	0.00322834	--	--	--	ABC transporter G family member 5	putative pigment precursor permease, P-loop containing nucleoside triphosphate hydrolase [Rosa chinensis]	F:GO:0016887; F:GO:0005524; C:GO:0016020	K05681 map02010 ABC transporters
RchiOBHm_Chr2g0122871	-1.57885	0.0011	0.0351307	--	--	--	--	--	--	NAC domain-containing protein 2-like	NAC domain-containing protein 2-like [Rosa chinensis]	F:GO:0003677	--
RchiOBHm_Chr2g0123611	2.85382	5e-05	0.00322834	2.08269	0.0006	0.0226208	--	--	--	alcohol dehydrogenase 1B	alcohol dehydrogenase 1B [Rosa chinensis]	F:GO:0016491; P:GO:0055114	--
RchiOBHm_Chr2g0124811	--	--	--	--	--	--	-1.85717	0.00065	0.0239894	triacylglycerol lipase SDP1	triacylglycerol lipase SDP1 [Rosa chinensis]	P:GO:0006629; P:GO:0008152; F:GO:0004806	K14674 map00100 Steroid biosynthesis
RchiOBHm_Chr2g0124821	-1.68311	0.0002	0.00978718	--	--	--	--	--	--	probable calcium-binding protein CML36	probable calcium-binding protein CML36 [Rosa chinensis]	F:GO:0005509	K13448 map04626 Plant-pathogen interaction
RchiOBHm_Chr2g0125431	--	--	--	--	--	--	-3.22325	5e-05	0.00322834	haloacid dehalogenase-like hydrolase domain-containing protein 3	haloacid dehalogenase-like hydrolase domain-containing protein 3 [Rosa chinensis]	P:GO:0008152; F:GO:0016787	--
RchiOBHm_Chr2g0126231	-2.78908	0.00035	0.015033	-3.84378	5e-05	0.00322834	--	--	--	expansin-B3-like	expansin-B3-like [Rosa chinensis]	C:GO:0005576; P:GO:0019953	--
RchiOBHm_Chr2g0126301	--	--	--	-4.06167	5e-05	0.00322834	-3.3773	5e-05	0.00322834	ethylene-responsive transcription factor ERF054	ethylene-responsive transcription factor ERF054 [Rosa chinensis]	F:GO:0003677	--
RchiOBHm_Chr2g0126411	3.64095	0.00025	0.0115953	2.97669	0.00125	0.0385361	--	--	--	lipase 1-like	uncharacterized protein LOC112184281 [Rosa chinensis]	--	--
RchiOBHm_Chr2g0126471	--	--	--	--	--	--	-1.94635	0.0001	0.00572684	bromodomain-containing protein 4	bromodomain-containing protein 4 [Rosa chinensis]	--	--
RchiOBHm_Chr2g0127101	--	--	--	-4.00238	5e-05	0.00322834	--	--	--	dnaJ homolog subfamily B member 13-like	dnaJ homolog subfamily B member 13-like [Rosa chinensis]	F:GO:0051082; P:GO:0006457	--
RchiOBHm_Chr2g0128641	2.51618	5e-05	0.00322834	1.73401	0.00115	0.0362702	--	--	--	acyl-coenzyme A oxidase 3, peroxisomal-like	acyl-coenzyme A oxidase 3, peroxisomal-like isoform X1 [Rosa chinensis]	F:GO:0003995; C:GO:0005777; F:GO:0003997; P:GO:0006635; F:GO:0050660; P:GO:0008152; P:GO:0055114; P:GO:0006631	K00232 map00071 Fatty acid degradation
RchiOBHm_Chr2g0128881	--	--	--	--	--	--	3.00892	5e-05	0.00322834	PLASMODESMATA CALLOSE-BINDING PROTEIN 5	PLASMODESMATA CALLOSE-BINDING PROTEIN 5 [Rosa chinensis]	--	--
RchiOBHm_Chr2g0129611	--	--	--	--	--	--	3.9058	0.0001	0.00572684	alpha-glucan water dikinase, chloroplastic-like	putative alpha-glucan, water dikinase [Rosa chinensis]	F:GO:0005524; P:GO:0016310; F:GO:0016301	--
RchiOBHm_Chr2g0130821	-1.72574	0.0007	0.0253552	-1.8452	5e-05	0.00322834	--	--	--	photosynthetic NDH subunit of subcomplex B 2, chloroplastic	photosynthetic NDH subunit of subcomplex B 2, chloroplastic [Rosa chinensis]	P:GO:0005975; F:GO:0003824; F:GO:0030246	--
RchiOBHm_Chr2g0131441	--	--	--	-3.51784	0.0015	0.0436334	2.84352	5e-05	0.00322834	protein trichome birefringence-like 43	protein trichome birefringence-like 43 [Rosa chinensis]	--	--
RchiOBHm_Chr2g0132281	--	--	--	-1.64776	0.0015	0.0436334	--	--	--	aspartyl protease family protein At5g10770	putative nepenthesin [Rosa chinensis]	F:GO:0004190; P:GO:0006508	--
RchiOBHm_Chr2g0132301	--	--	--	--	--	--	-2.46629	5e-05	0.00322834	uncharacterized LOC112189900	uncharacterized protein LOC112189900 isoform X1 [Rosa chinensis]	--	--
RchiOBHm_Chr2g0132371	--	--	--	--	--	--	-4.20103	0.00025	0.0115953	leucine-rich repeat extensin-like protein 2	leucine-rich repeat extensin-like protein 2 [Rosa chinensis]	--	--
RchiOBHm_Chr2g0132701	--	--	--	--	--	--	-5.20527	5e-05	0.00322834	chaperone protein dnaJ 8, chloroplastic	chaperone protein dnaJ 8, chloroplastic [Rosa chinensis]	--	--
RchiOBHm_Chr2g0133371	--	--	--	--	--	--	-3.85754	0.0003	0.0134078	zinc finger protein 1-like	zinc finger protein 1-like [Rosa chinensis]	F:GO:0046872	--
RchiOBHm_Chr2g0133411	--	--	--	-2.55619	0.00085	0.0292322	--	--	--	deSI-like protein At4g17486	deSI-like protein At4g17486 [Rosa chinensis]	--	--
RchiOBHm_Chr2g0133521	--	--	--	--	--	--	-2.46744	0.00015	0.00788832	uncharacterized LOC112187591	uncharacterized protein LOC112187591 [Rosa chinensis]	--	--
RchiOBHm_Chr2g0133691	--	--	--	--	--	--	-1.9348	0.0005	0.0197317	acetylornithine aminotransferase, mitochondrial-like	acetylornithine aminotransferase, mitochondrial-like [Rosa chinensis]	P:GO:0006525; F:GO:0030170; F:GO:0003824; F:GO:0008483	K00818 map00220 Arginine biosynthesis
RchiOBHm_Chr2g0134191	--	--	--	--	--	--	-2.62314	0.00015	0.00788832	putative UPF0481 protein At3g02645	putative UPF0481 protein At3g02645 [Rosa chinensis]	--	--
RchiOBHm_Chr2g0134401	1.97394	5e-05	0.00322834	--	--	--	-2.495	5e-05	0.00322834	F-box/LRR-repeat protein 14	putative leucine-rich repeat domain, L domain-containing protein [Rosa chinensis]	F:GO:0005515	--
RchiOBHm_Chr2g0134871	--	--	--	-1.65404	0.0016	0.0457597	--	--	--	haloalkane dehalogenase 2	uncharacterized protein LOC112185727 [Rosa chinensis]	F:GO:0003824	--
RchiOBHm_Chr2g0135261	-1.90173	0.00035	0.015033	--	--	--	--	--	--	phosphatidylcholine:diacylglycerol cholinephosphotransferase 1-like	phosphatidylcholine:diacylglycerol cholinephosphotransferase 1-like [Rosa chinensis]	--	--
RchiOBHm_Chr2g0135471	--	--	--	--	--	--	1.46669	0.0014	0.0416089	protein LURP-one-related 12-like	protein LURP-one-related 12-like [Rosa chinensis]	--	--
RchiOBHm_Chr2g0135591	-1.90531	0.00035	0.015033	--	--	--	--	--	--	umecyanin-like	umecyanin-like [Rosa chinensis]	F:GO:0009055	--
RchiOBHm_Chr2g0135631	--	--	--	--	--	--	-2.12356	0.0011	0.0351307	glucan endo-1,3-beta-glucosidase 14-like	glucan endo-1,3-beta-glucosidase 14-like [Rosa chinensis]	P:GO:0005975	--
RchiOBHm_Chr2g0135711	--	--	--	-1.61042	0.00135	0.04063	--	--	--	uncharacterized LOC112189723	uncharacterized protein LOC112189723 [Rosa chinensis]	F:GO:0005515; P:GO:0006396	--
RchiOBHm_Chr2g0135861	-1.61412	0.0007	0.0253552	-1.9252	5e-05	0.00322834	--	--	--	uncharacterized LOC112190006	uncharacterized protein LOC112190006 [Rosa chinensis]	--	--
RchiOBHm_Chr2g0136021	-1.69335	0.0005	0.0197317	-1.89809	0.0002	0.00978718	--	--	--	DCC family protein At1g52590, chloroplastic	DCC family protein At1g52590, chloroplastic [Rosa chinensis]	--	--
RchiOBHm_Chr2g0137541	--	--	--	--	--	--	-3.0041	5e-05	0.00322834	F-box/kelch-repeat protein At1g15670-like	F-box/kelch-repeat protein At1g15670-like [Rosa chinensis]	F:GO:0005515	--
RchiOBHm_Chr2g0138231	--	--	--	--	--	--	2.14088	0.0001	0.00572684	mitochondrial arginine transporter BAC2-like	mitochondrial arginine transporter BAC2-like [Rosa chinensis]	P:GO:0055085	--
RchiOBHm_Chr2g0139491	--	--	--	--	--	--	-3.48988	5e-05	0.00322834	aquaporin TIP2-1-like	putative major intrinsic protein [Rosa chinensis]	C:GO:0016020; P:GO:0006810; F:GO:0005215	--
RchiOBHm_Chr2g0140141	2.43155	0.00085	0.0292322	--	--	--	4.32461	5e-05	0.00322834	uncharacterized LOC112188879	uncharacterized protein LOC112188879 [Rosa chinensis]	--	--
RchiOBHm_Chr2g0140461	--	--	--	--	--	--	-1.91355	0.0002	0.00978718	transcription factor MYBS3	transcription factor MYBS3 [Rosa chinensis]	F:GO:0003677	--
RchiOBHm_Chr2g0140911	--	--	--	--	--	--	-5.16709	5e-05	0.00322834	uncharacterized LOC112183877	uncharacterized protein LOC112183877 [Rosa chinensis]	--	--
RchiOBHm_Chr2g0140921	--	--	--	--	--	--	-2.0326	0.0001	0.00572684	profilin	profilin [Rosa chinensis]	F:GO:0003779	--
RchiOBHm_Chr2g0140991	--	--	--	--	--	--	-1.88435	0.00135	0.04063	acid phosphatase 1-like	acid phosphatase 1-like [Rosa chinensis]	F:GO:0003993	K20728 map04016 MAPK signaling pathway - plant
RchiOBHm_Chr2g0142431	-3.44805	5e-05	0.00322834	--	--	--	-1.73652	0.00055	0.0211442	protein DMR6-LIKE OXYGENASE 2-like	protein DMR6-LIKE OXYGENASE 2-like [Rosa chinensis]	F:GO:0016491; P:GO:0055114	--
RchiOBHm_Chr2g0142571	--	--	--	-2.40546	0.00015	0.00788832	--	--	--	inorganic pyrophosphatase 1-like	inorganic pyrophosphatase 1-like [Rosa chinensis]	F:GO:0016791	K06124 map00564 Glycerophospholipid metabolism
RchiOBHm_Chr2g0142961	3.45972	5e-05	0.00322834	3.62328	5e-05	0.00322834	--	--	--	beta-galactosidase 1	beta-galactosidase 1 [Rosa chinensis]	P:GO:0005975; F:GO:0030246	--
RchiOBHm_Chr2g0143571	--	--	--	-1.47689	0.0008	0.027924	--	--	--	glyoxylate/succinic semialdehyde reductase 2, chloroplastic	putative glyoxylate reductase (NADP(+)) [Rosa chinensis]	F:GO:0004616; F:GO:0016491; P:GO:0055114	K18121 map00630 Glyoxylate and dicarboxylate metabolism
RchiOBHm_Chr2g0144681	--	--	--	--	--	--	-3.09286	5e-05	0.00322834	solute carrier family 25 member 44-like	solute carrier family 25 member 44-like [Rosa chinensis]	P:GO:0055085	--
RchiOBHm_Chr2g0145111	--	--	--	-2.15939	0.0009	0.0303727	--	--	--	uncharacterized LOC112189189	putative NAD(P)-binding domain-containing protein [Rosa chinensis]	--	--
RchiOBHm_Chr2g0145191	--	--	--	--	--	--	2.14399	0.0001	0.00572684	myb-related protein 308-like	myb-related protein 308-like [Rosa chinensis]	F:GO:0003677	--
RchiOBHm_Chr2g0145401	--	--	--	--	--	--	2.12758	5e-05	0.00322834	auxin-binding protein ABP19a-like	putative germin, rmlC-like cupin domain-containing protein [Rosa chinensis]	F:GO:0030145; F:GO:0045735	--
RchiOBHm_Chr2g0145921	-2.85938	5e-05	0.00322834	--	--	--	--	--	--	cytochrome P450 71A1-like	putative flavonoid 3'-monooxygenase [Rosa chinensis]	F:GO:0005506; P:GO:0055114; F:GO:0020037	K20623 map00905 Brassinosteroid biosynthesis
RchiOBHm_Chr2g0145961	-3.01423	5e-05	0.00322834	-2.90683	5e-05	0.00322834	-3.7211	5e-05	0.00322834	linoleate 13S-lipoxygenase 3-1, chloroplastic	linoleate 13S-lipoxygenase 3-1, chloroplastic [Rosa chinensis]	F:GO:0005515; F:GO:0046872; F:GO:0016491; P:GO:0055114	K00454 map00591 Linoleic acid metabolism
RchiOBHm_Chr2g0146271	--	--	--	-1.5687	0.0017	0.0477705	--	--	--	transmembrane protein 87A	transmembrane protein 87A [Rosa chinensis]	C:GO:0016021	--
RchiOBHm_Chr2g0146371	-3.32521	5e-05	0.00322834	-2.43765	0.00055	0.0211442	-4.57294	5e-05	0.00322834	protein TIFY 10b-like	protein TIFY 10b-like [Rosa chinensis]	--	K13464 map04075 Plant hormone signal transduction
RchiOBHm_Chr2g0147071	-2.30527	5e-05	0.00322834	-2.76187	5e-05	0.00322834	-1.52575	0.00085	0.0292322	GDSL esterase/lipase 1-like	GDSL esterase/lipase 1-like [Rosa chinensis]	--	--
RchiOBHm_Chr2g0147301	--	--	--	--	--	--	-4.55893	5e-05	0.00322834	GDSL esterase/lipase 2-like	GDSL esterase/lipase 2-like [Rosa chinensis]	--	--
RchiOBHm_Chr2g0147671	--	--	--	-1.61051	0.0014	0.0416089	--	--	--	subtilisin-like protease SBT1.5	subtilisin-like protease SBT1.5 [Rosa chinensis]	P:GO:0006508; F:GO:0004252	--
RchiOBHm_Chr2g0147731	--	--	--	--	--	--	-3.89156	5e-05	0.00322834	uncharacterized LOC112188343	uncharacterized protein LOC112188343 [Rosa chinensis]	--	--
RchiOBHm_Chr2g0148351	-2.39323	0.00135	0.04063	-2.51207	0.0004	0.0166112	--	--	--	uncharacterized LOC112186914	uncharacterized protein LOC112186914 [Rosa chinensis]	--	--
RchiOBHm_Chr2g0148611	2.14867	0.00065	0.0239894	--	--	--	--	--	--	phosphatidylcholine transfer protein	putative START-like domain-containing protein [Rosa chinensis]	F:GO:0008289	--
RchiOBHm_Chr2g0149671	1.93602	0.0001	0.00572684	1.95325	5e-05	0.00322834	--	--	--	F-box/kelch-repeat protein At1g51550	F-box/kelch-repeat protein At1g51550 [Rosa chinensis]	F:GO:0005515	--
RchiOBHm_Chr2g0149701	-3.71199	5e-05	0.00322834	-4.58239	5e-05	0.00322834	--	--	--	B-box zinc finger protein 32-like	B-box zinc finger protein 32-like [Rosa chinensis]	F:GO:0008270; C:GO:0005622	--
RchiOBHm_Chr2g0151371	-3.12158	0.00035	0.015033	--	--	--	--	--	--	xyloglucan endotransglucosylase/hydrolase 2-like	xyloglucan endotransglucosylase/hydrolase 2-like [Rosa chinensis]	P:GO:0005975; P:GO:0006073; C:GO:0005618; C:GO:0048046; F:GO:0016762; P:GO:0010411; P:GO:0042546	K14504 map04075 Plant hormone signal transduction
RchiOBHm_Chr2g0151981	-1.87368	0.00025	0.0115953	-2.19713	5e-05	0.00322834	--	--	--	uncharacterized LOC112185550	uncharacterized protein LOC112185550 isoform X2 [Rosa chinensis]	--	--
RchiOBHm_Chr2g0152311	--	--	--	--	--	--	-2.45618	0.0001	0.00572684	glutathione S-transferase F9-like	glutathione S-transferase F9-like [Rosa chinensis]	F:GO:0005515	K00799 map00480 Glutathione metabolism
RchiOBHm_Chr2g0152501	-1.52655	0.00115	0.0362702	-2.12934	5e-05	0.00322834	--	--	--	uncharacterized oxidoreductase At1g06690, chloroplastic	uncharacterized oxidoreductase At1g06690, chloroplastic [Rosa chinensis]	F:GO:0016491; P:GO:0055114	--
RchiOBHm_Chr2g0152531	--	--	--	--	--	--	-1.49703	0.0016	0.0457597	probable polyamine oxidase 2	putative oxidoreductase [Rosa chinensis]	F:GO:0016491; P:GO:0055114	K17839 map00330 Arginine and proline metabolism
RchiOBHm_Chr2g0153231	--	--	--	-1.71538	0.0016	0.0457597	--	--	--	anthocyanidin 3-O-glucosyltransferase 2-like	anthocyanidin 3-O-glucosyltransferase 2-like [Rosa chinensis]	P:GO:0008152	--
RchiOBHm_Chr2g0153461	--	--	--	--	--	--	-1.7578	0.0004	0.0166112	putative UDP-glucose flavonoid 3-O-glucosyltransferase 3	putative UDP-glucose flavonoid 3-O-glucosyltransferase 3 [Rosa chinensis]	P:GO:0008152	--
RchiOBHm_Chr2g0153601	-2.44365	5e-05	0.00322834	-2.29144	0.0001	0.00572684	--	--	--	uncharacterized LOC112187726	uncharacterized protein LOC112187726 [Rosa chinensis]	--	--
RchiOBHm_Chr2g0153621	-1.62342	0.00165	0.0467628	--	--	--	-1.73472	0.00075	0.026584	myosin-9	myosin-9 [Rosa chinensis]	--	--
RchiOBHm_Chr2g0153861	--	--	--	--	--	--	-1.92539	5e-05	0.00322834	UDP-arabinose 4-epimerase 1-like	UDP-arabinose 4-epimerase 1-like [Rosa chinensis]	F:GO:0003978; P:GO:0006012	K12448 map00520 Amino sugar and nucleotide sugar metabolism
RchiOBHm_Chr2g0154021	--	--	--	--	--	--	1.75728	0.00045	0.0182298	7-deoxyloganetin glucosyltransferase-like	7-deoxyloganetin glucosyltransferase-like [Rosa chinensis]	P:GO:0008152	K21374 map00902 Monoterpenoid biosynthesis
RchiOBHm_Chr2g0154191	1.98652	0.0001	0.00572684	2.11722	5e-05	0.00322834	--	--	--	7-deoxyloganetin glucosyltransferase-like	7-deoxyloganetin glucosyltransferase-like [Rosa chinensis]	P:GO:0008152	K21374 map00902 Monoterpenoid biosynthesis
RchiOBHm_Chr2g0155581	--	--	--	--	--	--	3.27307	0.00015	0.00788832	zinc finger protein CONSTANS-LIKE 9-like	putative transcription factor interactor and regulator Znf-B family [Rosa chinensis]	F:GO:0008270; C:GO:0005622	--
RchiOBHm_Chr2g0155901	--	--	--	-2.2945	5e-05	0.00322834	--	--	--	glucose-6-phosphate 1-dehydrogenase, chloroplastic-like	glucose-6-phosphate 1-dehydrogenase, chloroplastic-like [Rosa chinensis]	F:GO:0050661; P:GO:0055114; P:GO:0006006; F:GO:0004345	K00036 map00030 Pentose phosphate pathway
RchiOBHm_Chr2g0155911	--	--	--	-1.82015	0.00025	0.0115953	--	--	--	fasciclin-like arabinogalactan protein 2	fasciclin-like arabinogalactan protein 2 [Rosa chinensis]	--	--
RchiOBHm_Chr2g0155991	--	--	--	--	--	--	2.18614	0.00025	0.0115953	SNF1-related protein kinase regulatory subunit beta-2-like	putative association with the SNF1 complex (ASC) domain, immunoglobulin E-set [Rosa chinensis]	F:GO:0005515	--
RchiOBHm_Chr2g0156481	--	--	--	--	--	--	-1.79594	0.0003	0.0134078	zinc finger CCCH domain-containing protein 18	zinc finger CCCH domain-containing protein 18 [Rosa chinensis]	F:GO:0003676; F:GO:0000166; F:GO:0046872	--
RchiOBHm_Chr2g0156971	--	--	--	--	--	--	2.59875	5e-05	0.00322834	uncharacterized LOC112189103	uncharacterized protein LOC112189103 [Rosa chinensis]	--	--
RchiOBHm_Chr2g0157181	-2.68234	0.0004	0.0166112	--	--	--	--	--	--	fibrous sheath CABYR-binding protein-like	fibrous sheath CABYR-binding protein-like [Rosa chinensis]	0	--
RchiOBHm_Chr2g0157611	--	--	--	--	--	--	-1.76285	0.0011	0.0351307	protein-tyrosine-phosphatase IBR5	protein-tyrosine-phosphatase IBR5 [Rosa chinensis]	F:GO:0004725; P:GO:0006470; F:GO:0016791; P:GO:0016311; F:GO:0008138	--
RchiOBHm_Chr2g0157791	--	--	--	1.68636	0.00125	0.0385361	--	--	--	palmitoyl-monogalactosyldiacylglycerol delta-7 desaturase, chloroplastic-like	palmitoyl-monogalactosyldiacylglycerol delta-7 desaturase, chloroplastic-like [Rosa chinensis]	P:GO:0006629; P:GO:0055114	--
RchiOBHm_Chr2g0158331	--	--	--	-2.72367	0.0016	0.0457597	--	--	--	endoglucanase 11-like	endoglucanase 11-like [Rosa chinensis]	P:GO:0005975; F:GO:0003824	K01179 map00500 Starch and sucrose metabolism
RchiOBHm_Chr2g0158821	-2.50946	0.00165	0.0467628	-2.75233	0.00015	0.00788832	-3.27009	0.0001	0.00572684	mitogen-activated protein kinase kinase kinase 18-like	mitogen-activated protein kinase kinase kinase 18-like [Rosa chinensis]	F:GO:0005524; F:GO:0004672; P:GO:0006468	K20716 map04016 MAPK signaling pathway - plant
RchiOBHm_Chr2g0159011	--	--	--	--	--	--	1.87414	0.00015	0.00788832	aquaporin SIP1-1-like	aquaporin SIP1-1-like [Rosa chinensis]	C:GO:0016020; P:GO:0006810; F:GO:0005215	--
RchiOBHm_Chr2g0159131	--	--	--	-2.22715	0.00145	0.0426478	--	--	--	NADPH-dependent oxidoreductase 2-alkenal reductase-like	NADPH-dependent oxidoreductase 2-alkenal reductase-like [Rosa chinensis]	F:GO:0016491; P:GO:0055114	--
RchiOBHm_Chr2g0160291	--	--	--	--	--	--	1.56043	0.0017	0.0477705	beta-amylase	beta-amylase isoform X1 [Rosa chinensis]	P:GO:0005975; P:GO:0000272; F:GO:0016161	K01177 map00500 Starch and sucrose metabolism
RchiOBHm_Chr2g0160421	--	--	--	-2.85033	5e-05	0.00322834	--	--	--	probable terpene synthase 9	putative (E)-beta-ocimene synthase [Rosa chinensis]	P:GO:0008152; F:GO:0016829; F:GO:0010333	K07385 map00902 Monoterpenoid biosynthesis
RchiOBHm_Chr2g0160471	--	--	--	-2.19922	0.0003	0.0134078	--	--	--	uncharacterized LOC112188845	uncharacterized protein LOC112188845 [Rosa chinensis]	--	--
RchiOBHm_Chr2g0160641	--	--	--	-2.94685	0.0004	0.0166112	--	--	--	uncharacterized LOC112188447	uncharacterized protein LOC112188447 [Rosa chinensis]	--	--
RchiOBHm_Chr2g0160761	-3.87012	5e-05	0.00322834	-3.0859	5e-05	0.00322834	-3.18938	0.0001	0.00572684	calcium-binding protein PBP1-like	calcium-binding protein PBP1-like [Rosa chinensis]	F:GO:0005509	K10840 map03420 Nucleotide excision repair
RchiOBHm_Chr2g0161131	--	--	--	-2.52043	5e-05	0.00322834	--	--	--	zinc finger protein CONSTANS-LIKE 4-like	zinc finger protein CONSTANS-LIKE 4-like [Rosa chinensis]	F:GO:0008270; C:GO:0005622	--
RchiOBHm_Chr2g0161541	1.72146	0.0017	0.0477705	--	--	--	--	--	--	vesicle-associated protein 4-2-like	vesicle-associated protein 4-2-like [Rosa chinensis]	C:GO:0005789	--
RchiOBHm_Chr2g0162101	-2.56526	5e-05	0.00322834	-2.87939	5e-05	0.00322834	-1.7862	0.0006	0.0226208	uncharacterized LOC112189492	uncharacterized protein LOC112189492 [Rosa chinensis]	--	--
RchiOBHm_Chr2g0162621	--	--	--	--	--	--	-3.00579	5e-05	0.00322834	LOB domain-containing protein 41-like	LOB domain-containing protein 41-like [Rosa chinensis]	--	--
RchiOBHm_Chr2g0163131	--	--	--	-2.65181	5e-05	0.00322834	--	--	--	uncharacterized LOC112188756	uncharacterized protein LOC112188756 isoform X1 [Rosa chinensis]	--	--
RchiOBHm_Chr2g0163151	-6.84752	5e-05	0.00322834	-7.23538	5e-05	0.00322834	-4.59609	5e-05	0.00322834	allene oxide cyclase, chloroplastic-like	allene oxide cyclase, chloroplastic-like [Rosa chinensis]	C:GO:0009507; F:GO:0016853	K10525 map00592 alpha-Linolenic acid metabolism
RchiOBHm_Chr2g0163211	--	--	--	--	--	--	-3.53357	0.0001	0.00572684	uncharacterized LOC112188763	hypothetical protein RchiOBHm_Chr2g0163211 [Rosa chinensis]	--	--
RchiOBHm_Chr2g0163471	--	--	--	--	--	--	1.92796	0.00085	0.0292322	cinnamoyl-CoA reductase-like SNL6	cinnamoyl-CoA reductase-like SNL6 [Rosa chinensis]	F:GO:0003854; P:GO:0055114; P:GO:0006694	--
RchiOBHm_Chr2g0163921	--	--	--	--	--	--	2.36629	5e-05	0.00322834	proline dehydrogenase 2, mitochondrial	proline dehydrogenase 2, mitochondrial [Rosa chinensis]	F:GO:0004657; P:GO:0006562	K00318 map00330 Arginine and proline metabolism
RchiOBHm_Chr2g0163981	-4.67155	5e-05	0.00322834	-3.57788	5e-05	0.00322834	-3.34577	5e-05	0.00322834	late embryogenesis abundant protein 2-like	hypothetical protein RchiOBHm_Chr2g0163981 [Rosa chinensis]	--	--
RchiOBHm_Chr2g0163991	-2.59825	5e-05	0.00322834	-1.99054	0.00025	0.0115953	--	--	--	stress-induced protein KIN2-like	stress-induced protein KIN2-like [Rosa chinensis]	--	--
RchiOBHm_Chr2g0164041	--	--	--	-2.34807	0.0001	0.00572684	--	--	--	uncharacterized LOC112189703	uncharacterized protein LOC112189703 [Rosa chinensis]	F:GO:0005509	--
RchiOBHm_Chr2g0165151	--	--	--	1.67397	0.00075	0.026584	--	--	--	cytochrome P450 85A-like	cytochrome P450 85A-like [Rosa chinensis]	F:GO:0005506; P:GO:0055114; F:GO:0020037	K09590 map00905 Brassinosteroid biosynthesis
RchiOBHm_Chr2g0165751	-4.22805	5e-05	0.00322834	--	--	--	--	--	--	phenolic glucoside malonyltransferase 1-like	phenolic glucoside malonyltransferase 1-like isoform X1 [Rosa chinensis]	--	K13264 map00944 Flavone and flavonol biosynthesis
RchiOBHm_Chr2g0165801	-1.84918	0.00065	0.0239894	--	--	--	--	--	--	ninja-family protein AFP3-like	ninja-family protein AFP3-like [Rosa chinensis]	--	--
RchiOBHm_Chr2g0165861	1.62223	0.00115	0.0362702	--	--	--	--	--	--	serine carboxypeptidase-like 25	serine carboxypeptidase-like 25 [Rosa chinensis]	P:GO:0006508; F:GO:0004185	--
RchiOBHm_Chr2g0167401	--	--	--	--	--	--	1.56888	0.00125	0.0385361	SPX domain-containing protein 4	SPX domain-containing protein 4 [Rosa chinensis]	--	--
RchiOBHm_Chr2g0167411	-1.55926	0.00125	0.0385361	--	--	--	--	--	--	cystathionine gamma-synthase 1, chloroplastic	cystathionine gamma-synthase 1, chloroplastic [Rosa chinensis]	F:GO:0030170; F:GO:0003824	K01739 map00270 Cysteine and methionine metabolism
RchiOBHm_Chr2g0168381	-1.9552	0.0013	0.0396058	--	--	--	--	--	--	amino acid transporter AVT1I	amino acid transporter AVT1I isoform X1 [Rosa chinensis]	--	--
RchiOBHm_Chr2g0168471	-1.7694	5e-05	0.00322834	--	--	--	--	--	--	zinc-finger homeodomain protein 9-like	zinc-finger homeodomain protein 9-like [Rosa chinensis]	F:GO:0003677	--
RchiOBHm_Chr2g0168581	--	--	--	--	--	--	-1.79925	0.00015	0.00788832	transcription factor MYB30-like	transcription factor MYB30-like [Rosa chinensis]	F:GO:0003677	--
RchiOBHm_Chr2g0168751	-2.06287	0.0002	0.00978718	-2.01115	0.00025	0.0115953	--	--	--	tubulin alpha-2 chain-like	PREDICTED: tubulin alpha-2 chain-like [Fragaria vesca subsp. vesca]	F:GO:0005525; F:GO:0003924; F:GO:0005200; C:GO:0005874; P:GO:0007017	K07374 map04145 Phagosome
RchiOBHm_Chr2g0168761	-1.80846	0.0018	0.0498395	-2.26256	0.00075	0.026584	--	--	--	ABC transporter B family member 19	ABC transporter B family member 19 [Rosa chinensis]	F:GO:0016887; F:GO:0005524; P:GO:0055085; C:GO:0016021; P:GO:0006810	K05658 map02010 ABC transporters
RchiOBHm_Chr2g0168821	--	--	--	--	--	--	-2.12571	0.0002	0.00978718	binding partner of ACD11 1-like	binding partner of ACD11 1-like [Rosa chinensis]	F:GO:0003676; F:GO:0000166	--
RchiOBHm_Chr2g0169521	-3.78796	5e-05	0.00322834	-2.18479	0.0002	0.00978718	--	--	--	AAA-ATPase ASD, mitochondrial-like	putative ATPase, AAA-type, core, AAA-type ATPase domain-containing protein [Rosa chinensis]	F:GO:0005524	--
RchiOBHm_Chr2g0169951	-4.25813	5e-05	0.00322834	-2.28934	0.00045	0.0182298	-2.20212	0.00015	0.00788832	probable galacturonosyltransferase-like 10	probable galacturonosyltransferase-like 10 [Rosa chinensis]	--	--
RchiOBHm_Chr2g0170291	1.74153	0.0009	0.0303727	1.66635	0.00075	0.026584	--	--	--	protein CREG1	protein CREG1 isoform X2 [Rosa chinensis]	F:GO:0010181; F:GO:0016491; P:GO:0055114	--
RchiOBHm_Chr2g0170331	-1.72393	0.00035	0.015033	--	--	--	--	--	--	ferredoxin-thioredoxin reductase catalytic chain, chloroplastic	ferredoxin-thioredoxin reductase catalytic chain, chloroplastic [Rosa chinensis]	P:GO:0055114	--
RchiOBHm_Chr2g0171691	--	--	--	--	--	--	1.95586	0.00065	0.0239894	L-aspartate oxidase, chloroplastic	L-aspartate oxidase, chloroplastic [Rosa chinensis]	C:GO:0005737; F:GO:0016491; P:GO:0009435; P:GO:0055114; F:GO:0008734	K00278 map00250 Alanine, aspartate and glutamate metabolism
RchiOBHm_Chr2g0172171	--	--	--	-2.73048	0.00025	0.0115953	--	--	--	carbonic anhydrase 2-like	carbonic anhydrase 2-like isoform X1 [Rosa chinensis]	F:GO:0008270; F:GO:0004089; P:GO:0015976	K01673 map00910 Nitrogen metabolism
RchiOBHm_Chr2g0172231	--	--	--	--	--	--	2.11292	0.0001	0.00572684	cinnamoyl-CoA reductase-like SNL6	cinnamoyl-CoA reductase-like SNL6 [Rosa chinensis]	F:GO:0003854; P:GO:0055114; P:GO:0006694	--
RchiOBHm_Chr2g0172541	--	--	--	-2.76103	0.00175	0.0488412	--	--	--	phosphoenolpyruvate/phosphate translocator 1, chloroplastic-like	phosphoenolpyruvate/phosphate translocator 2, chloroplastic-like isoform X1 [Rosa chinensis]	C:GO:0016021; P:GO:0006810; F:GO:0005215	--
RchiOBHm_Chr2g0172571	-1.99696	5e-05	0.00322834	--	--	--	--	--	--	glutaredoxin-like	glutaredoxin-like [Rosa chinensis]	F:GO:0015035; F:GO:0009055; P:GO:0045454	--
RchiOBHm_Chr2g0172751	--	--	--	--	--	--	2.09525	0.0002	0.00978718	high affinity nitrate transporter 2.7-like	high affinity nitrate transporter 2.7-like [Rosa chinensis]	P:GO:0055085; C:GO:0016021; F:GO:0005215	K02575 map00910 Nitrogen metabolism
RchiOBHm_Chr2g0172761	3.39483	0.0007	0.0253552	3.27073	0.00015	0.00788832	3.35356	0.0001	0.00572684	chaperone protein dnaJ C76, chloroplastic-like	chaperone protein dnaJ C76, chloroplastic-like isoform X1 [Rosa chinensis]	--	--
RchiOBHm_Chr2g0172801	--	--	--	--	--	--	1.66487	0.00075	0.026584	F-box/LRR-repeat protein 4	F-box/LRR-repeat protein 4 [Rosa chinensis]	F:GO:0005515	--
RchiOBHm_Chr2g0173061	-1.85677	5e-05	0.00322834	--	--	--	-2.91697	5e-05	0.00322834	probable galactinol--sucrose galactosyltransferase 5	probable galactinol--sucrose galactosyltransferase 5 [Rosa chinensis]	F:GO:0003824	K06617 map00052 Galactose metabolism
RchiOBHm_Chr2g0173281	--	--	--	--	--	--	-2.32689	5e-05	0.00322834	glucuronokinase 1-like	glucuronokinase 1-like [Rosa chinensis]	F:GO:0005524; C:GO:0005737; P:GO:0008152; F:GO:0016301	K16190 map00040 Pentose and glucuronate interconversions
RchiOBHm_Chr2g0173381	--	--	--	--	--	--	-4.85569	5e-05	0.00322834	GDSL esterase/lipase At5g14450-like	GDSL esterase/lipase At5g14450-like [Rosa chinensis]	--	--
RchiOBHm_Chr2g0173831	--	--	--	--	--	--	1.72151	0.00115	0.0362702	cystinosin homolog	cystinosin homolog [Rosa chinensis]	--	--
RchiOBHm_Chr2g0175491	--	--	--	--	--	--	-1.87548	0.00065	0.0239894	cytochrome P450 94B3	cytochrome P450 94B3 [Rosa chinensis]	F:GO:0005506; P:GO:0055114; F:GO:0020037	--
RchiOBHm_Chr2g0175871	2.2275	5e-05	0.00322834	2.43637	5e-05	0.00322834	--	--	--	uncharacterized LOC112189949	uncharacterized protein LOC112189949 [Rosa chinensis]	--	--
RchiOBHm_Chr2g0175901	--	--	--	2.02508	0.0008	0.027924	--	--	--	squamosa promoter-binding-like protein 16	squamosa promoter-binding-like protein 16 [Rosa chinensis]	F:GO:0003677; C:GO:0005634	--
RchiOBHm_Chr2g0176091	--	--	--	-2.19126	5e-05	0.00322834	-2.27993	0.001	0.0328082	uncharacterized LOC112189466	hypothetical protein RchiOBHm_Chr2g0176091 [Rosa chinensis]	--	--
RchiOBHm_Chr2g0176291	-1.86593	5e-05	0.00322834	--	--	--	--	--	--	GEM-like protein 5	GEM-like protein 5 [Rosa chinensis]	--	--
RchiOBHm_Chr2g0176491	1.60892	0.00075	0.026584	--	--	--	--	--	--	alpha-mannosidase At3g26720-like	alpha-mannosidase At3g26720-like isoform X2 [Rosa chinensis]	P:GO:0005975; F:GO:0004559; F:GO:0008270; F:GO:0003824; P:GO:0006013; F:GO:0015923; F:GO:0030246	K01191 map00511 Other glycan degradation
RchiOBHm_Chr3g0447631	-1.86007	0.00075	0.026584	--	--	--	--	--	--	protein TIC 20-II, chloroplastic	protein TIC 20-II, chloroplastic [Rosa chinensis]	--	--
RchiOBHm_Chr3g0447721	--	--	--	-2.51595	0.0015	0.0436334	--	--	--	thioredoxin F-type, chloroplastic-like	putative monodehydroascorbate reductase (NADH) [Rosa chinensis]	F:GO:0015035; P:GO:0006662; P:GO:0045454	--
RchiOBHm_Chr3g0448961	--	--	--	-5.9756	5e-05	0.00322834	--	--	--	GDSL esterase/lipase At5g33370-like	GDSL esterase/lipase At5g33370-like [Rosa chinensis]	--	--
RchiOBHm_Chr3g0448981	--	--	--	--	--	--	2.74747	0.0008	0.027924	GDSL esterase/lipase LTL1-like	putative triacylglycerol lipase [Rosa chinensis]	--	--
RchiOBHm_Chr3g0449081	--	--	--	--	--	--	2.05316	0.00015	0.00788832	ammonium transporter 1 member 2-like	ammonium transporter 1 member 2-like [Rosa chinensis]	F:GO:0008519; P:GO:0015696; P:GO:0072488; C:GO:0016020	K07573 map03018 RNA degradation
RchiOBHm_Chr3g0451081	--	--	--	--	--	--	-1.58155	0.0003	0.0134078	auxin-responsive protein IAA4-like	auxin-responsive protein IAA4-like [Rosa chinensis]	C:GO:0005634; F:GO:0005515	K14484 map04075 Plant hormone signal transduction
RchiOBHm_Chr3g0451421	-1.56494	0.0006	0.0226208	-1.5125	0.0006	0.0226208	--	--	--	probable ribose-5-phosphate isomerase 3, chloroplastic	probable ribose-5-phosphate isomerase 3, chloroplastic [Rosa chinensis]	F:GO:0004751	K01807 map00030 Pentose phosphate pathway
RchiOBHm_Chr3g0452041	-2.03958	0.0004	0.0166112	--	--	--	--	--	--	uncharacterized LOC112194910	uncharacterized protein LOC112194910 [Rosa chinensis]	--	--
RchiOBHm_Chr3g0452211	-2.00305	0.0002	0.00978718	-1.79055	0.0007	0.0253552	--	--	--	rubredoxin	uncharacterized protein LOC112193094 [Rosa chinensis]	F:GO:0046872; F:GO:0005506	--
RchiOBHm_Chr3g0452261	--	--	--	2.52784	0.00125	0.0385361	--	--	--	cysteine synthase-like	putative cysteine synthase [Rosa chinensis]	F:GO:0004124; P:GO:0006535	K01738 map00270 Cysteine and methionine metabolism
RchiOBHm_Chr3g0452731	--	--	--	2.16988	0.0005	0.0197317	--	--	--	glycine-rich cell wall structural protein-like	glycine-rich cell wall structural protein-like [Rosa chinensis]	--	--
RchiOBHm_Chr3g0454041	--	--	--	--	--	--	2.93243	0.0001	0.00572684	sodium/hydrogen exchanger 1-like	sodium/hydrogen exchanger 1-like [Rosa chinensis]	P:GO:0006814; P:GO:0055085; P:GO:0006812; F:GO:0015299; F:GO:0015385; C:GO:0016021; P:GO:0006885	--
RchiOBHm_Chr3g0454761	-2.04866	0.00115	0.0362702	-2.93237	5e-05	0.00322834	--	--	--	chaperone protein dnaJ C76, chloroplastic	chaperone protein dnaJ C76, chloroplastic [Rosa chinensis]	--	--
RchiOBHm_Chr3g0455111	2.00825	0.0001	0.00572684	2.20946	5e-05	0.00322834	--	--	--	probable linoleate 9S-lipoxygenase 5	putative linoleate 9S-lipoxygenase [Rosa chinensis]	F:GO:0005515; F:GO:0046872; F:GO:0016491; P:GO:0055114	K00454 map00591 Linoleic acid metabolism
RchiOBHm_Chr3g0455321	-2.45638	5e-05	0.00322834	-3.04269	0.0001	0.00572684	--	--	--	psbP domain-containing protein 7, chloroplastic	psbP domain-containing protein 7, chloroplastic [Rosa chinensis]	F:GO:0005509; C:GO:0009523; C:GO:0009654; P:GO:0015979; C:GO:0019898	--
RchiOBHm_Chr3g0455491	-2.37416	0.0001	0.00572684	-1.97606	0.0001	0.00572684	--	--	--	histone H2A.1	histone H2A.1 [Rosa chinensis]	F:GO:0003677; C:GO:0005634; F:GO:0046982; C:GO:0000786	--
RchiOBHm_Chr3g0456211	--	--	--	--	--	--	-3.27028	5e-05	0.00322834	dormancy-associated protein homolog 3	dormancy-associated protein homolog 3 isoform X3 [Rosa chinensis]	--	--
RchiOBHm_Chr3g0456421	-3.16427	0.00025	0.0115953	-3.16416	5e-05	0.00322834	-2.77167	5e-05	0.00322834	F-box protein PP2-B15-like	F-box protein PP2-B15-like [Rosa chinensis]	F:GO:0005515	--
RchiOBHm_Chr3g0456731	--	--	--	--	--	--	2.10836	5e-05	0.00322834	dnaJ homolog subfamily B member 3	dnaJ homolog subfamily B member 3 [Rosa chinensis]	--	--
RchiOBHm_Chr3g0456811	2.35595	5e-05	0.00322834	2.0663	5e-05	0.00322834	-2.13923	0.0014	0.0416089	uncharacterized LOC112193536	uncharacterized protein LOC112193536 [Rosa chinensis]	F:GO:0003676; F:GO:0008408; P:GO:0006139	--
RchiOBHm_Chr3g0457291	-1.64431	0.0009	0.0303727	--	--	--	--	--	--	transcription factor bHLH149	transcription factor bHLH149 [Rosa chinensis]	F:GO:0046983	--
RchiOBHm_Chr3g0457621	-4.12792	5e-05	0.00322834	-3.88306	5e-05	0.00322834	--	--	--	galactinol synthase 2-like	galactinol synthase 2-like [Rosa chinensis]	--	K18819 map00052 Galactose metabolism
RchiOBHm_Chr3g0457631	-5.20796	5e-05	0.00322834	-4.78573	5e-05	0.00322834	-6.88732	5e-05	0.00322834	galactinol synthase 2-like	galactinol synthase 2-like [Rosa chinensis]	--	K18819 map00052 Galactose metabolism
RchiOBHm_Chr3g0458081	2.76268	0.0002	0.00978718	2.50758	0.0002	0.00978718	--	--	--	branched-chain-amino-acid aminotransferase 2, chloroplastic-like	branched-chain-amino-acid aminotransferase 2, chloroplastic-like isoform X1 [Rosa chinensis]	F:GO:0003824; P:GO:0008152; F:GO:0004084; P:GO:0009081	K00826 map00270 Cysteine and methionine metabolism
RchiOBHm_Chr3g0458271	--	--	--	--	--	--	2.24555	5e-05	0.00322834	S-adenosylmethionine synthase 1-like	S-adenosylmethionine synthase 1-like [Rosa chinensis]	F:GO:0005524; P:GO:0006556; F:GO:0004478	K00789 map00270 Cysteine and methionine metabolism
RchiOBHm_Chr3g0458641	--	--	--	--	--	--	-1.4676	0.0017	0.0477705	hydrophobic protein RCI2B-like	hydrophobic protein RCI2B-like [Rosa chinensis]	C:GO:0016021	--
RchiOBHm_Chr3g0458761	1.69847	0.0005	0.0197317	2.81104	5e-05	0.00322834	--	--	--	pectin acetylesterase 12-like	pectin acetylesterase 12-like [Rosa chinensis]	F:GO:0016787	--
RchiOBHm_Chr3g0459341	--	--	--	-1.72397	0.0016	0.0457597	--	--	--	uncharacterized LOC112193530	uncharacterized protein LOC112193530 [Rosa chinensis]	--	--
RchiOBHm_Chr3g0459661	-1.88982	0.00035	0.015033	--	--	--	--	--	--	uncharacterized LOC112192689	uncharacterized protein LOC112192689 [Rosa chinensis]	--	--
RchiOBHm_Chr3g0459681	-2.10338	0.00045	0.0182298	--	--	--	--	--	--	calcium-binding protein CML42	calcium-binding protein CML42 [Rosa chinensis]	F:GO:0005509	K13448 map04626 Plant-pathogen interaction
RchiOBHm_Chr3g0460541	--	--	--	-3.59977	5e-05	0.00322834	--	--	--	non-specific lipid-transfer protein 3-like	non-specific lipid-transfer protein 3-like [Rosa chinensis]	P:GO:0006869; F:GO:0008289	--
RchiOBHm_Chr3g0460881	-1.59609	0.00075	0.026584	-1.85165	0.0002	0.00978718	--	--	--	CBL-interacting serine/threonine-protein kinase 14-like	CBL-interacting serine/threonine-protein kinase 14-like [Rosa chinensis]	F:GO:0005524; P:GO:0007165; F:GO:0004672; P:GO:0006468	--
RchiOBHm_Chr3g0461481	--	--	--	--	--	--	-2.84682	5e-05	0.00322834	probable WRKY transcription factor 33	probable WRKY transcription factor 33 [Rosa chinensis]	F:GO:0043565	K13424 map04016 MAPK signaling pathway - plant
RchiOBHm_Chr3g0461781	1.82491	5e-05	0.00322834	--	--	--	1.43688	0.0015	0.0436334	abscisic acid receptor PYL4	abscisic acid receptor PYL4 [Rosa chinensis]	--	--
RchiOBHm_Chr3g0462091	-7.4518	5e-05	0.00322834	-7.50515	0.0001	0.00572684	-5.25568	5e-05	0.00322834	tryptophan synthase alpha chain-like	tryptophan synthase alpha chain-like [Rosa chinensis]	F:GO:0004834; F:GO:0003824; P:GO:0008152; P:GO:0006568	K01695 map00260 Glycine, serine and threonine metabolism
RchiOBHm_Chr3g0462261	--	--	--	--	--	--	-2.43366	0.00025	0.0115953	lectin-domain containing receptor kinase VI.3-like	lectin-domain containing receptor kinase VI.3-like [Rosa chinensis]	F:GO:0005524; F:GO:0004672; P:GO:0006468; F:GO:0030246	--
RchiOBHm_Chr3g0462961	-3.09175	5e-05	0.00322834	--	--	--	-2.87468	5e-05	0.00322834	probable 2-oxoglutarate-dependent dioxygenase At5g05600	probable 2-oxoglutarate-dependent dioxygenase At5g05600 [Rosa chinensis]	F:GO:0016491; P:GO:0055114	--
RchiOBHm_Chr3g0463101	--	--	--	--	--	--	3.41139	5e-05	0.00322834	probable pyridoxal 5'-phosphate synthase subunit PDX1	probable pyridoxal 5'-phosphate synthase subunit PDX1 [Rosa chinensis]	P:GO:0042823; F:GO:0003824; P:GO:0008152; P:GO:0042819	K06215 map00750 Vitamin B6 metabolism
RchiOBHm_Chr3g0463311	--	--	--	--	--	--	-1.80456	0.0007	0.0253552	uncharacterized LOC112193112	uncharacterized protein LOC112193112 [Rosa chinensis]	F:GO:2001070; F:GO:0030246	--
RchiOBHm_Chr3g0463521	--	--	--	--	--	--	2.39828	0.0001	0.00572684	lactosylceramide 4-alpha-galactosyltransferase-like	lactosylceramide 4-alpha-galactosyltransferase-like [Rosa chinensis]	--	K01988 map00601 Glycosphingolipid biosynthesis - lacto and neolacto series
RchiOBHm_Chr3g0463551	1.62439	0.00085	0.0292322	1.37767	0.00385	0.00856474	--	--	--	auxin transporter-like protein 2	auxin transporter-like protein 2 [Rosa chinensis]	--	K13946 map04075 Plant hormone signal transduction
RchiOBHm_Chr3g0463591	--	--	--	-1.60575	0.0006	0.0226208	--	--	--	glycerol-3-phosphate 2-O-acyltransferase 6	glycerol-3-phosphate 2-O-acyltransferase 6 [Rosa chinensis]	P:GO:0008152	K13508 map00561 Glycerolipid metabolism
RchiOBHm_Chr3g0463811	--	--	--	--	--	--	-1.85605	0.0003	0.0134078	uncharacterized LOC112194859	hypothetical protein RchiOBHm_Chr3g0463811 [Rosa chinensis]	--	--
RchiOBHm_Chr3g0464041	-1.73444	0.00165	0.0467628	--	--	--	--	--	--	60S ribosomal protein L35a-1	60S ribosomal protein L35a-1 [Rosa chinensis]	F:GO:0003735; C:GO:0005840; C:GO:0005622; P:GO:0006412	K02917 map03010 Ribosome
RchiOBHm_Chr3g0464061	-2.24351	0.00095	0.0315944	-2.35309	0.0009	0.0303727	--	--	--	O-fucosyltransferase 19-like	O-fucosyltransferase 19-like [Rosa chinensis]	--	--
RchiOBHm_Chr3g0464101	-1.78304	0.00045	0.0182298	-1.58325	0.00095	0.0315944	1.82029	0.00025	0.0115953	heme-binding-like protein At3g10130, chloroplastic	heme-binding-like protein At3g10130, chloroplastic [Rosa chinensis]	--	--
RchiOBHm_Chr3g0464361	--	--	--	1.65462	0.0018	0.0498395	--	--	--	7-deoxyloganetic acid glucosyltransferase-like	putative 7-deoxyloganetic acid glucosyltransferase [Rosa chinensis]	P:GO:0008152	K21373 map00902 Monoterpenoid biosynthesis
RchiOBHm_Chr3g0464641	-1.96085	0.00095	0.0315944	--	--	--	-2.85498	5e-05	0.00322834	uncharacterized LOC112192272	uncharacterized protein LOC112192272 [Rosa chinensis]	--	--
RchiOBHm_Chr3g0465141	--	--	--	2.18347	0.00165	0.0467628	--	--	--	NADPH-dependent aldo-keto reductase, chloroplastic-like	NADPH-dependent aldo-keto reductase, chloroplastic-like [Rosa chinensis]	F:GO:0016491; P:GO:0055114	K00002 map00010 Glycolysis / Gluconeogenesis
RchiOBHm_Chr3g0465271	-2.00082	0.0018	0.0498395	-2.19529	0.00135	0.04063	--	--	--	NADPH-dependent aldo-keto reductase, chloroplastic-like	NADPH-dependent aldo-keto reductase, chloroplastic-like isoform X1 [Rosa chinensis]	F:GO:0016491; P:GO:0055114	K00002 map00010 Glycolysis / Gluconeogenesis
RchiOBHm_Chr3g0465651	-2.56317	0.0002	0.00978718	-2.24561	0.0011	0.0351307	--	--	--	ribulose bisphosphate carboxylase/oxygenase activase, chloroplastic-like	ribulose bisphosphate carboxylase/oxygenase activase, chloroplastic-like [Rosa chinensis]	F:GO:0005524	--
RchiOBHm_Chr3g0465861	--	--	--	--	--	--	-2.14116	0.0014	0.0416089	L-type lectin-domain containing receptor kinase IV.1-like	putative protein kinase RLK-Pelle-L-LEC family [Rosa chinensis]	F:GO:0005524; F:GO:0004672; P:GO:0006468; F:GO:0030246	--
RchiOBHm_Chr3g0465991	--	--	--	--	--	--	2.79055	5e-05	0.00322834	L-type lectin-domain containing receptor kinase IV.1-like	L-type lectin-domain containing receptor kinase IV.1-like [Rosa chinensis]	F:GO:0005524; F:GO:0004672; P:GO:0006468; F:GO:0030246	--
RchiOBHm_Chr3g0466241	--	--	--	--	--	--	-2.80226	0.0001	0.00572684	uncharacterized LOC112191649	uncharacterized protein LOC112191649 [Rosa chinensis]	F:GO:0031072; F:GO:0051082	--
RchiOBHm_Chr3g0466461	--	--	--	--	--	--	-2.23521	5e-05	0.00322834	expansin-A6	expansin-A6 [Rosa chinensis]	P:GO:0009664; C:GO:0005576	--
RchiOBHm_Chr3g0466971	-2.10294	0.00045	0.0182298	--	--	--	--	--	--	probable mediator of RNA polymerase II transcription subunit 37e	probable mediator of RNA polymerase II transcription subunit 37e [Rosa chinensis]	--	K03283 map03040 Spliceosome
RchiOBHm_Chr3g0467251	--	--	--	--	--	--	-1.63022	0.001	0.0328082	uncharacterized LOC112193555	uncharacterized protein LOC112193555 [Rosa chinensis]	F:GO:0008270; F:GO:0005515	--
RchiOBHm_Chr3g0467401	--	--	--	1.4394	0.0018	0.0498395	--	--	--	soluble inorganic pyrophosphatase 4-like	soluble inorganic pyrophosphatase 4-like [Rosa chinensis]	F:GO:0000287; F:GO:0004427; C:GO:0005737; P:GO:0006796	K01507 map00190 Oxidative phosphorylation
RchiOBHm_Chr3g0467431	1.92043	0.0002	0.00978718	1.97722	0.0002	0.00978718	--	--	--	WAT1-related protein At2g37460	WAT1-related protein At2g37460 [Rosa chinensis]	C:GO:0016020; C:GO:0016021	--
RchiOBHm_Chr3g0467681	--	--	--	-3.51971	0.00085	0.0292322	--	--	--	uncharacterized LOC112193446	uncharacterized protein LOC112193446 [Rosa chinensis]	--	--
RchiOBHm_Chr3g0467831	-4.15876	0.00175	0.0488412	-3.26154	0.0016	0.0457597	--	--	--	exocyst complex component EXO70H1-like	exocyst complex component EXO70H1-like [Rosa chinensis]	P:GO:0006887; C:GO:0000145	--
RchiOBHm_Chr3g0468101	-2.53732	0.00015	0.00788832	-2.91495	0.00025	0.0115953	--	--	--	E3 ubiquitin-protein ligase SGR9, amyloplastic	E3 ubiquitin-protein ligase SGR9, amyloplastic [Rosa chinensis]	F:GO:0008270; F:GO:0005515	--
RchiOBHm_Chr3g0468121	2.60748	0.00025	0.0115953	--	--	--	--	--	--	probable protein phosphatase 2C 38	probable protein phosphatase 2C 38 [Rosa chinensis]	F:GO:0004722; F:GO:0003824; P:GO:0006470; F:GO:0043169	--
RchiOBHm_Chr3g0468451	-1.76157	0.00065	0.0239894	-2.11869	0.0001	0.00572684	--	--	--	uncharacterized LOC112193345	uncharacterized protein LOC112193345 isoform X1 [Rosa chinensis]	--	--
RchiOBHm_Chr3g0468461	--	--	--	-1.75305	0.0005	0.0197317	--	--	--	protein REVEILLE 8-like	protein REVEILLE 8-like [Rosa chinensis]	F:GO:0003677	--
RchiOBHm_Chr3g0468701	--	--	--	--	--	--	2.61176	5e-05	0.00322834	pentatricopeptide repeat-containing protein At3g09650, chloroplastic	pentatricopeptide repeat-containing protein At3g09650, chloroplastic [Rosa chinensis]	--	--
RchiOBHm_Chr3g0469121	--	--	--	-1.90424	0.00045	0.0182298	--	--	--	L-type lectin-domain containing receptor kinase VIII.1-like	L-type lectin-domain containing receptor kinase VIII.1-like [Rosa chinensis]	F:GO:0005524; F:GO:0004672; P:GO:0006468; F:GO:0030246	--
RchiOBHm_Chr3g0469381	--	--	--	--	--	--	1.63751	0.00135	0.04063	zinc finger protein JACKDAW-like	zinc finger protein JACKDAW-like [Rosa chinensis]	F:GO:0003676; F:GO:0046872	--
RchiOBHm_Chr3g0469531	-3.55604	5e-05	0.00322834	-4.31564	0.00015	0.00788832	-3.26476	0.0001	0.00572684	aquaporin PIP2-1-like	aquaporin PIP2-1-like [Rosa chinensis]	C:GO:0016020; P:GO:0006810; F:GO:0005215	--
RchiOBHm_Chr3g0469541	-4.74045	5e-05	0.00322834	-5.20181	5e-05	0.00322834	-3.76569	5e-05	0.00322834	aquaporin PIP2-1-like	aquaporin PIP2-1-like [Rosa chinensis]	C:GO:0016020; P:GO:0006810; F:GO:0005215	--
RchiOBHm_Chr3g0469641	--	--	--	--	--	--	2.24833	0.00025	0.0115953	CASP-like protein 5A1	hypothetical protein RchiOBHm_Chr3g0469641 [Rosa chinensis]	--	--
RchiOBHm_Chr3g0469861	-2.10739	5e-05	0.00322834	--	--	--	2.81032	5e-05	0.00322834	phenylalanine ammonia-lyase 1	phenylalanine ammonia-lyase 1 [Rosa chinensis]	P:GO:0006559; C:GO:0005737; F:GO:0003824; F:GO:0016841	K10775 map00360 Phenylalanine metabolism
RchiOBHm_Chr3g0470171	--	--	--	--	--	--	-2.06111	5e-05	0.00322834	thylakoid lumenal 15.0 kDa protein 2, chloroplastic	thylakoid lumenal 15.0 kDa protein 2, chloroplastic [Rosa chinensis]	--	--
RchiOBHm_Chr3g0470271	--	--	--	1.84808	0.00035	0.015033	--	--	--	heavy metal-associated isoprenylated plant protein 6-like	heavy metal-associated isoprenylated plant protein 6-like [Rosa chinensis]	F:GO:0046872; P:GO:0030001	--
RchiOBHm_Chr3g0470361	-1.73242	0.00165	0.0467628	-1.81842	0.00105	0.0339528	--	--	--	uncharacterized LOC112191343	uncharacterized protein LOC112191343 [Rosa chinensis]	--	--
RchiOBHm_Chr3g0470451	--	--	--	--	--	--	-3.68005	0.00095	0.0315944	uncharacterized LOC112193892	uncharacterized protein LOC112193892 [Rosa chinensis]	--	--
RchiOBHm_Chr3g0470691	--	--	--	--	--	--	-6.37773	5e-05	0.00322834	E3 ubiquitin-protein ligase RZFP34-like	E3 ubiquitin-protein ligase RZFP34-like isoform X1 [Rosa chinensis]	F:GO:0008270; F:GO:0005515	K10144 map04120 Ubiquitin mediated proteolysis
RchiOBHm_Chr3g0470701	-2.03461	0.00045	0.0182298	-2.02095	0.0005	0.0197317	--	--	--	aquaporin TIP1-1	aquaporin TIP1-1 [Rosa chinensis]	C:GO:0016020; P:GO:0006810; F:GO:0005215	--
RchiOBHm_Chr3g0470981	--	--	--	3.32606	5e-05	0.00322834	2.93708	5e-05	0.00322834	thaumatin-like protein 1b	thaumatin-like protein 1b [Rosa chinensis]	--	--
RchiOBHm_Chr3g0471281	--	--	--	-2.6932	0.00085	0.0292322	--	--	--	uncharacterized LOC112193585	uncharacterized protein LOC112193585 [Rosa chinensis]	F:GO:0008270; C:GO:0005622	--
RchiOBHm_Chr3g0471471	-2.27033	0.0002	0.00978718	-2.39307	0.0001	0.00572684	--	--	--	peptidyl-prolyl cis-trans isomerase FKBP16-4, chloroplastic	peptidyl-prolyl cis-trans isomerase FKBP16-4, chloroplastic [Rosa chinensis]	--	--
RchiOBHm_Chr3g0471661	--	--	--	--	--	--	-2.37704	0.0002	0.00978718	sulfite exporter TauE/SafE family protein 4	sulfite exporter TauE/SafE family protein 4 [Rosa chinensis]	C:GO:0016021	--
RchiOBHm_Chr3g0471961	--	--	--	-3.97061	5e-05	0.00322834	--	--	--	glucomannan 4-beta-mannosyltransferase 9-like	glucomannan 4-beta-mannosyltransferase 9-like [Rosa chinensis]	--	--
RchiOBHm_Chr3g0471981	-2.14825	0.00075	0.026584	--	--	--	--	--	--	peroxiredoxin-2E-2, chloroplastic	peroxiredoxin-2E-2, chloroplastic [Rosa chinensis]	F:GO:0016491; P:GO:0045454	--
RchiOBHm_Chr3g0472451	2.28	5e-05	0.00322834	2.12737	5e-05	0.00322834	--	--	--	pleiotropic drug resistance protein 2-like	pleiotropic drug resistance protein 2-like [Rosa chinensis]	F:GO:0016887; F:GO:0005524; C:GO:0016020	--
RchiOBHm_Chr3g0474621	-1.58942	0.0005	0.0197317	--	--	--	--	--	--	uncharacterized LOC112193740	uncharacterized protein LOC112193740 [Rosa chinensis]	--	--
RchiOBHm_Chr3g0474931	--	--	--	--	--	--	-2.56972	5e-05	0.00322834	lysosomal Pro-X carboxypeptidase-like	lysosomal Pro-X carboxypeptidase-like isoform X1 [Rosa chinensis]	P:GO:0006508; F:GO:0008236	--
RchiOBHm_Chr3g0475291	1.63651	0.00075	0.026584	--	--	--	-2.76133	5e-05	0.00322834	transcription repressor OFP13	putative transcription factor OFP family [Rosa chinensis]	--	--
RchiOBHm_Chr3g0475521	-2.22559	0.0002	0.00978718	-2.52545	5e-05	0.00322834	--	--	--	probable aspartyl protease At4g16563	probable aspartyl protease At4g16563 [Rosa chinensis]	F:GO:0004190; P:GO:0006508	--
RchiOBHm_Chr3g0476101	-3.47698	5e-05	0.00322834	-2.55336	0.00015	0.00788832	-3.0751	0.00015	0.00788832	E3 ubiquitin-protein ligase PUB23-like	E3 ubiquitin-protein ligase PUB23-like [Rosa chinensis]	F:GO:0004842; F:GO:0005488; P:GO:0016567	--
RchiOBHm_Chr3g0477181	--	--	--	--	--	--	-1.76767	0.0009	0.0303727	calcium-dependent protein kinase 26-like	calcium-dependent protein kinase 26-like [Rosa chinensis]	F:GO:0005524; F:GO:0005509; F:GO:0004672; P:GO:0006468	K13412 map04626 Plant-pathogen interaction
RchiOBHm_Chr3g0477521	--	--	--	--	--	--	-2.04906	5e-05	0.00322834	probable carboxylesterase 15	probable carboxylesterase 15 [Rosa chinensis]	P:GO:0008152; F:GO:0016787	--
RchiOBHm_Chr3g0478901	3.70371	5e-05	0.00322834	4.11654	5e-05	0.00322834	3.0834	5e-05	0.00322834	cold and drought-regulated protein CORA-like	cold and drought-regulated protein CORA-like [Rosa chinensis]	--	--
RchiOBHm_Chr3g0479101	--	--	--	--	--	--	2.3463	5e-05	0.00322834	zinc finger protein 8	zinc finger protein 8 [Rosa chinensis]	F:GO:0046872	--
RchiOBHm_Chr3g0479441	-4.46337	5e-05	0.00322834	-3.56029	5e-05	0.00322834	-7.5938	0.0002	0.00978718	uncharacterized LOC112194353	uncharacterized protein LOC112194353 [Rosa chinensis]	--	--
RchiOBHm_Chr3g0479651	-2.80038	5e-05	0.00322834	-2.84183	5e-05	0.00322834	--	--	--	actin-like	actin family protein [Populus trichocarpa]	--	--
RchiOBHm_Chr3g0479761	-1.62525	0.00075	0.026584	--	--	--	--	--	--	delta(12)-fatty-acid desaturase FAD2	delta(12)-fatty-acid desaturase FAD2 isoform X1 [Rosa chinensis]	P:GO:0006629; P:GO:0055114	K10256 map01040 Biosynthesis of unsaturated fatty acids
RchiOBHm_Chr3g0479981	--	--	--	--	--	--	-3.56796	5e-05	0.00322834	uncharacterized LOC112193036	uncharacterized protein LOC112193036 [Rosa chinensis]	--	--
RchiOBHm_Chr3g0480801	--	--	--	--	--	--	1.67892	0.0007	0.0253552	uncharacterized LOC112192820	uncharacterized protein LOC112192820 isoform X1 [Rosa chinensis]	--	--
RchiOBHm_Chr3g0480991	--	--	--	-2.69966	5e-05	0.00322834	--	--	--	carboxyl-terminal-processing peptidase 3, chloroplastic	putative processing peptidase [Rosa chinensis]	F:GO:0005515; P:GO:0006508; F:GO:0008236	--
RchiOBHm_Chr3g0481531	--	--	--	--	--	--	1.6295	0.0015	0.0436334	putative elongation factor TypA-like SVR3, chloroplastic	putative elongation factor TypA-like SVR3, chloroplastic [Rosa chinensis]	F:GO:0005525; F:GO:0003924	--
RchiOBHm_Chr3g0481621	--	--	--	--	--	--	-2.19253	0.0006	0.0226208	probable galactinol--sucrose galactosyltransferase 2	probable galactinol--sucrose galactosyltransferase 2 [Rosa chinensis]	F:GO:0003824	K06617 map00052 Galactose metabolism
RchiOBHm_Chr3g0486551	--	--	--	--	--	--	-2.32285	0.0002	0.00978718	uncharacterized LOC112192252	uncharacterized protein LOC112192252 [Rosa chinensis]	F:GO:0005515	--
RchiOBHm_Chr3g0486641	--	--	--	-2.07262	0.0016	0.0457597	1.91887	5e-05	0.00322834	galactinol synthase 2-like	galactinol synthase 2-like [Rosa chinensis]	--	K18819 map00052 Galactose metabolism
RchiOBHm_Chr3g0487291	--	--	--	2.38423	5e-05	0.00322834	--	--	--	stachyose synthase-like	stachyose synthase-like [Rosa chinensis]	F:GO:0003824	K06611 map00052 Galactose metabolism
RchiOBHm_Chr3g0488531	--	--	--	--	--	--	-2.38082	5e-05	0.00322834	phytoene synthase 2, chloroplastic	phytoene synthase 2, chloroplastic [Rosa chinensis]	P:GO:0009058; F:GO:0016740	K02291 map00906 Carotenoid biosynthesis
RchiOBHm_Chr3g0490221	-1.56689	0.00095	0.0315944	--	--	--	-2.80061	5e-05	0.00322834	glutamate decarboxylase 1	putative glutamate decarboxylase [Rosa chinensis]	F:GO:0030170; P:GO:0006536; F:GO:0003824; F:GO:0004351; P:GO:0019752; F:GO:0016831	K01580 map00250 Alanine, aspartate and glutamate metabolism
RchiOBHm_Chr3g0492391	-3.51694	5e-05	0.00322834	--	--	--	-3.25756	5e-05	0.00322834	U-box domain-containing protein 21	U-box domain-containing protein 21 [Rosa chinensis]	F:GO:0004842; F:GO:0005488; P:GO:0016567	--
RchiOBHm_Chr3g0493151	--	--	--	-1.80692	0.00075	0.026584	--	--	--	HMG-Y-related protein A-like	putative High mobility group protein HMGA [Rosa chinensis]	F:GO:0003677; C:GO:0005634; C:GO:0000786; C:GO:0000785; P:GO:0006334	--
RchiOBHm_Chr3g0493581	-1.8823	0.00055	0.0211442	-1.97696	0.0004	0.0166112	--	--	--	uncharacterized LOC112193422	uncharacterized protein LOC112193422 isoform X2 [Rosa chinensis]	--	--
RchiOBHm_Chr3g0494731	--	--	--	--	--	--	2.74486	5e-05	0.00322834	4-alpha-glucanotransferase DPE2	putative 4-alpha-glucanotransferase [Rosa chinensis]	P:GO:0005975; F:GO:2001070; F:GO:0030246; F:GO:0004134	K00705 map00500 Starch and sucrose metabolism
RchiOBHm_Chr3g0494821	2.87207	5e-05	0.00322834	3.67117	5e-05	0.00322834	--	--	--	WAT1-related protein At5g07050-like	WAT1-related protein At5g07050-like [Rosa chinensis]	C:GO:0016020; C:GO:0016021	--
RchiOBHm_Chr3g0495741	--	--	--	--	--	--	1.93947	0.0004	0.0166112	probable S-sulfocysteine synthase, chloroplastic	probable S-sulfocysteine synthase, chloroplastic [Rosa chinensis]	F:GO:0004124; P:GO:0006535	K01738 map00270 Cysteine and methionine metabolism
RchiOBHm_Chr3g0496451	--	--	--	--	--	--	-4.43469	5e-05	0.00322834	dehydrin HIRD11	hypothetical protein RchiOBHm_Chr3g0496451 [Rosa chinensis]	0	--
RchiOBHm_Chr3g0496681	--	--	--	--	--	--	-2.45891	0.0001	0.00572684	beta-glucosidase BoGH3B-like	uncharacterized protein LOC112193668 [Rosa chinensis]	P:GO:0005975	K01188 map00460 Cyanoamino acid metabolism
RchiOBHm_Chr3g0496751	--	--	--	--	--	--	-1.92028	0.0008	0.027924	nucleolar protein 58-like	nucleolar protein 58-like [Rosa chinensis]	--	--
RchiOBHm_Chr3g0497211	--	--	--	--	--	--	-2.6991	5e-05	0.00322834	thioredoxin-like 1-1, chloroplastic	thioredoxin-like 1-1, chloroplastic [Rosa chinensis]	P:GO:0045454	--
RchiOBHm_Chr4g0387611	2.26942	5e-05	0.00322834	2.31666	5e-05	0.00322834	1.62834	0.0008	0.027924	VAN3-binding protein-like	VAN3-binding protein-like isoform X1 [Rosa chinensis]	--	--
RchiOBHm_Chr4g0387701	-2.60115	5e-05	0.00322834	-3.10149	5e-05	0.00322834	--	--	--	1,2-dihydroxy-3-keto-5-methylthiopentene dioxygenase 1	1,2-dihydroxy-3-keto-5-methylthiopentene dioxygenase 1 [Rosa chinensis]	F:GO:0016491; P:GO:0019509; F:GO:0010309; P:GO:0055114	K08967 map00270 Cysteine and methionine metabolism
RchiOBHm_Chr4g0387791	--	--	--	-4.13453	0.00155	0.0447056	4.77346	5e-05	0.00322834	early light-induced protein, chloroplastic-like	early light-induced protein, chloroplastic-like [Rosa chinensis]	--	--
RchiOBHm_Chr4g0387801	--	--	--	--	--	--	3.86524	5e-05	0.00322834	early light-induced protein 1, chloroplastic-like	early light-induced protein 1, chloroplastic-like [Rosa chinensis]	--	--
RchiOBHm_Chr4g0388281	--	--	--	--	--	--	2.15662	0.00065	0.0239894	ATP sulfurylase 1, chloroplastic	ATP sulfurylase 1, chloroplastic [Rosa chinensis]	F:GO:0004781; P:GO:0000103	K13811 map00230 Purine metabolism
RchiOBHm_Chr4g0388961	--	--	--	--	--	--	2.04381	5e-05	0.00322834	uncharacterized LOC112200150	uncharacterized protein LOC112200150 [Rosa chinensis]	P:GO:0033617; C:GO:0005739	--
RchiOBHm_Chr4g0389791	--	--	--	-3.03639	0.0003	0.0134078	-6.64907	0.00145	0.0426478	protein SIEVE ELEMENT OCCLUSION B-like	protein SIEVE ELEMENT OCCLUSION B-like [Rosa chinensis]	--	--
RchiOBHm_Chr4g0389841	-2.92198	0.00175	0.0488412	--	--	--	-3.74758	0.00055	0.0211442	transcription factor WER-like	putative transcription factor MYB-HB-like family [Rosa chinensis]	F:GO:0003677	--
RchiOBHm_Chr4g0389901	-1.79535	0.00065	0.0239894	-2.62025	5e-05	0.00322834	-3.07076	5e-05	0.00322834	protein SIEVE ELEMENT OCCLUSION B-like	protein SIEVE ELEMENT OCCLUSION B-like [Rosa chinensis]	--	--
RchiOBHm_Chr4g0392501	-1.89986	0.0015	0.0436334	-1.11807	0.0286	0.0314128	-4.26247	0.0001	0.00572684	ethylene-responsive transcription factor 1B	ethylene-responsive transcription factor 1B [Rosa chinensis]	F:GO:0003677	K14516 map04016 MAPK signaling pathway - plant
RchiOBHm_Chr4g0392661	4.30632	5e-05	0.00322834	4.78303	5e-05	0.00322834	4.11005	5e-05	0.00322834	early nodulin-75-like	hypothetical protein RchiOBHm_Chr4g0392661 [Rosa chinensis]	--	--
RchiOBHm_Chr4g0393101	--	--	--	--	--	--	2.46723	0.00055	0.0211442	kaempferol 3-O-beta-D-galactosyltransferase-like	kaempferol 3-O-beta-D-galactosyltransferase-like [Rosa chinensis]	P:GO:0008152	K12930 map00942 Anthocyanin biosynthesis
RchiOBHm_Chr4g0394991	-2.03963	5e-05	0.00322834	-2.85135	5e-05	0.00322834	--	--	--	protein PROTON GRADIENT REGULATION 5, chloroplastic	protein PROTON GRADIENT REGULATION 5, chloroplastic [Rosa chinensis]	--	--
RchiOBHm_Chr4g0395321	--	--	--	--	--	--	-2.69168	0.001	0.0328082	non-functional NADPH-dependent codeinone reductase 2-like	non-functional NADPH-dependent codeinone reductase 2-like [Rosa chinensis]	F:GO:0016491; P:GO:0055114	K08243 map00941 Flavonoid biosynthesis
RchiOBHm_Chr4g0396171	-2.161	0.00145	0.0426478	-3.30521	0.0002	0.00978718	--	--	--	uncharacterized LOC112197486	uncharacterized protein LOC112197486 [Rosa chinensis]	--	--
RchiOBHm_Chr4g0396921	--	--	--	-2.35562	5e-05	0.00322834	-2.10263	0.0002	0.00978718	probable pectate lyase 8	probable pectate lyase 8 [Rosa chinensis]	--	K01728 map00040 Pentose and glucuronate interconversions
RchiOBHm_Chr4g0397111	-2.77015	5e-05	0.00322834	--	--	--	-2.17419	0.00015	0.00788832	alternative oxidase 3, mitochondrial-like	alternative oxidase 3, mitochondrial-like [Rosa chinensis]	F:GO:0009916; P:GO:0055114	--
RchiOBHm_Chr4g0397681	--	--	--	--	--	--	1.86806	0.00015	0.00788832	uncharacterized LOC112197010	uncharacterized protein LOC112197010 [Rosa chinensis]	--	--
RchiOBHm_Chr4g0398151	--	--	--	-2.97147	0.00165	0.0467628	--	--	--	sodium transporter HKT1-like	putative cation transporter [Rosa chinensis]	P:GO:0006812; P:GO:0055085; F:GO:0008324	--
RchiOBHm_Chr4g0398291	-2.12381	0.00015	0.00788832	-2.08972	0.0001	0.00572684	--	--	--	serine carboxypeptidase-like 13	serine carboxypeptidase-like 13 [Rosa chinensis]	P:GO:0006508; F:GO:0004185	--
RchiOBHm_Chr4g0398631	1.87338	0.00155	0.0447056	2.68727	5e-05	0.00322834	3.30825	5e-05	0.00322834	probable xyloglucan endotransglucosylase/hydrolase protein 23	probable xyloglucan endotransglucosylase/hydrolase protein 23 [Rosa chinensis]	P:GO:0005975; P:GO:0006073; C:GO:0005618; C:GO:0048046; F:GO:0016762; P:GO:0010411; P:GO:0042546	K14504 map04075 Plant hormone signal transduction
RchiOBHm_Chr4g0398691	-2.01984	0.00025	0.0115953	-2.13977	0.0001	0.00572684	--	--	--	thioredoxin X, chloroplastic	thioredoxin X, chloroplastic [Rosa chinensis]	F:GO:0015035; P:GO:0006662; P:GO:0045454	--
RchiOBHm_Chr4g0398741	-2.1883	0.00105	0.0339528	--	--	--	--	--	--	probable WRKY transcription factor 11	probable WRKY transcription factor 11 [Rosa chinensis]	F:GO:0043565	--
RchiOBHm_Chr4g0399211	-2.79043	5e-05	0.00322834	-2.49954	0.0001	0.00572684	-2.4244	5e-05	0.00322834	transcription factor bHLH35	transcription factor bHLH35 isoform X1 [Rosa chinensis]	F:GO:0046983	--
RchiOBHm_Chr4g0402761	--	--	--	--	--	--	1.99642	5e-05	0.00322834	CASP-like protein 2C1	CASP-like protein 2C1 [Rosa chinensis]	--	--
RchiOBHm_Chr4g0402891	-4.50522	5e-05	0.00322834	-4.26513	5e-05	0.00322834	-3.96973	5e-05	0.00322834	probable xyloglucan endotransglucosylase/hydrolase protein 23	probable xyloglucan endotransglucosylase/hydrolase protein 23 [Rosa chinensis]	P:GO:0005975; P:GO:0006073; C:GO:0005618; C:GO:0048046; F:GO:0016762; P:GO:0010411; P:GO:0042546	K14504 map04075 Plant hormone signal transduction
RchiOBHm_Chr4g0403461	--	--	--	--	--	--	-1.98406	0.0008	0.027924	protein DETOXIFICATION 16-like	protein DETOXIFICATION 16-like [Rosa chinensis]	P:GO:0006855; P:GO:0055085; F:GO:0015297; C:GO:0016020; F:GO:0015238	--
RchiOBHm_Chr4g0403511	-5.06723	5e-05	0.00322834	-5.31407	0.0002	0.00978718	--	--	--	pathogenesis-related protein PR-1-like	pathogenesis-related protein PR-1-like [Rosa chinensis]	C:GO:0005576	--
RchiOBHm_Chr4g0403651	-2.12581	0.0015	0.0436334	-2.27616	0.0006	0.0226208	--	--	--	uncharacterized protein At4g14100-like	uncharacterized protein At4g14100-like [Rosa chinensis]	--	--
RchiOBHm_Chr4g0403911	--	--	--	1.88262	0.0003	0.0134078	--	--	--	protein GLUTAMINE DUMPER 3	protein GLUTAMINE DUMPER 3 [Rosa chinensis]	--	--
RchiOBHm_Chr4g0404641	--	--	--	--	--	--	-3.62207	5e-05	0.00322834	probable alpha,alpha-trehalose-phosphate synthase [UDP-forming] 11	probable alpha,alpha-trehalose-phosphate synthase [UDP-forming]	F:GO:0003824; P:GO:0005992	K16055 map00500 Starch and sucrose metabolism
RchiOBHm_Chr4g0404991	--	--	--	-1.59655	0.0012	0.0373427	--	--	--	protein ECERIFERUM 3	protein ECERIFERUM 3 [Rosa chinensis]	F:GO:0005506; F:GO:0016491; P:GO:0055114; P:GO:0006633	--
RchiOBHm_Chr4g0405201	--	--	--	--	--	--	-2.30229	5e-05	0.00322834	AFG1-like ATPase	AFG1-like ATPase [Rosa chinensis]	F:GO:0005524	--
RchiOBHm_Chr4g0405561	--	--	--	--	--	--	-1.6078	0.0011	0.0351307	uncharacterized LOC112197464	uncharacterized protein LOC112197464 isoform X2 [Rosa chinensis]	--	--
RchiOBHm_Chr4g0406651	-2.47838	0.0001	0.00572684	-2.72658	0.00065	0.0239894	--	--	--	calmodulin-like protein 7	calmodulin-like protein 7 [Rosa chinensis]	F:GO:0005509	K13448 map04626 Plant-pathogen interaction
RchiOBHm_Chr4g0406801	-1.89028	0.0002	0.00978718	-1.70777	0.0009	0.0303727	--	--	--	tetrapyrrole-binding protein, chloroplastic	tetrapyrrole-binding protein, chloroplastic [Rosa chinensis]	--	--
RchiOBHm_Chr4g0409001	--	--	--	--	--	--	-1.49236	0.0018	0.0498395	transcription factor bHLH128	putative transcription factor bHLH family [Rosa chinensis]	F:GO:0046983	--
RchiOBHm_Chr4g0410371	--	--	--	--	--	--	2.82377	0.00125	0.0385361	amino acid transporter AVT1H	amino acid transporter AVT1H [Rosa chinensis]	--	--
RchiOBHm_Chr4g0410671	2.45326	0.00155	0.0447056	--	--	--	--	--	--	probable aldo-keto reductase 2	probable aldo-keto reductase 2 [Rosa chinensis]	--	--
RchiOBHm_Chr4g0411421	--	--	--	-2.07337	5e-05	0.00322834	--	--	--	30S ribosomal protein S1, chloroplastic	30S ribosomal protein S1 isoform X1 [Rosa chinensis]	F:GO:0003676	--
RchiOBHm_Chr4g0412541	--	--	--	--	--	--	-2.52352	0.0004	0.0166112	MDIS1-interacting receptor like kinase 2-like	MDIS1-interacting receptor like kinase 2-like isoform X1 [Rosa chinensis]	F:GO:0005524; F:GO:0005515; F:GO:0004672; P:GO:0006468	--
RchiOBHm_Chr4g0412651	1.69697	0.0018	0.0498395	1.61476	0.001	0.0328082	3.055	5e-05	0.00322834	xyloglucan endotransglucosylase/hydrolase 2-like	putative xyloglucan:xyloglucosyl transferase, Xyloglucan-specific endo-beta-1,4-glucanase [Rosa chinensis]	P:GO:0005975; P:GO:0006073; C:GO:0005618; C:GO:0048046; F:GO:0016762	--
RchiOBHm_Chr4g0413311	--	--	--	--	--	--	-13.8584	0.0013	0.0396058	uncharacterized LOC112198408	uncharacterized protein LOC112198408 isoform X2 [Rosa chinensis]	C:GO:0005789; P:GO:0007029	--
RchiOBHm_Chr4g0413641	--	--	--	2.0293	0.00025	0.0115953	--	--	--	glycine-rich RNA-binding protein 4, mitochondrial	glycine-rich RNA-binding protein 4, mitochondrial [Rosa chinensis]	F:GO:0003676; F:GO:0000166	--
RchiOBHm_Chr4g0414111	3.51386	0.00105	0.0339528	--	--	--	--	--	--	beta-galactosidase 9	beta-galactosidase 9 isoform X1 [Rosa chinensis]	P:GO:0005975; F:GO:0030246	--
RchiOBHm_Chr4g0415351	--	--	--	--	--	--	-2.14198	0.00125	0.0385361	receptor like protein kinase S.2	putative protein kinase RLK-Pelle-L-LEC family [Rosa chinensis]	F:GO:0005524; F:GO:0004672; P:GO:0006468	--
RchiOBHm_Chr4g0416321	--	--	--	--	--	--	1.50703	0.00155	0.0447056	probable serine/threonine-protein kinase WNK9	probable serine/threonine-protein kinase WNK9 [Rosa chinensis]	F:GO:0005524; F:GO:0004672; P:GO:0006468	--
RchiOBHm_Chr4g0416451	--	--	--	--	--	--	-2.8683	0.0012	0.0373427	primary amine oxidase-like	putative primary-amine oxidase [Rosa chinensis]	P:GO:0009308; F:GO:0005507; F:GO:0048038; F:GO:0008131; P:GO:0055114	K00276 map00260 Glycine, serine and threonine metabolism
RchiOBHm_Chr4g0416541	--	--	--	-1.88635	0.00095	0.0315944	--	--	--	protein NRT1/ PTR FAMILY 3.1-like	putative proton-dependent oligopeptide transporter family, major facilitator superfamily [Rosa chinensis]	C:GO:0016020; P:GO:0006810; F:GO:0005215	--
RchiOBHm_Chr4g0416721	--	--	--	--	--	--	-1.75097	0.00025	0.0115953	sugar transport protein 13-like	sugar transport protein 13-like [Rosa chinensis]	F:GO:0022891; P:GO:0055085; F:GO:0022857; C:GO:0016020; C:GO:0016021; F:GO:0005215	--
RchiOBHm_Chr4g0416831	-2.39491	0.0002	0.00978718	--	--	--	--	--	--	tuliposide A-converting enzyme 2, chloroplastic-like	tuliposide A-converting enzyme 2, chloroplastic-like [Rosa chinensis]	P:GO:0008152; F:GO:0016787	--
RchiOBHm_Chr4g0416841	-3.17104	5e-05	0.00322834	-1.73941	0.00115	0.0362702	-3.0255	5e-05	0.00322834	2-hydroxyisoflavanone dehydratase-like	2-hydroxyisoflavanone dehydratase-like [Rosa chinensis]	P:GO:0008152; F:GO:0016787	--
RchiOBHm_Chr4g0417161	-5.02537	0.0004	0.0166112	--	--	--	--	--	--	protein FANTASTIC FOUR 3	protein FANTASTIC FOUR 3 [Rosa chinensis]	--	--
RchiOBHm_Chr4g0417311	-2.0357	0.0006	0.0226208	--	--	--	--	--	--	uncharacterized GPI-anchored protein At3g06035-like	hypothetical protein RchiOBHm_Chr4g0417311 [Rosa chinensis]	--	--
RchiOBHm_Chr4g0417821	--	--	--	--	--	--	1.74257	0.00045	0.0182298	protein trichome birefringence-like 11	protein trichome birefringence-like 11 [Rosa chinensis]	--	--
RchiOBHm_Chr4g0417861	--	--	--	--	--	--	-2.91192	0.00035	0.015033	stem-specific protein TSJT1	stem-specific protein TSJT1 [Rosa chinensis]	--	--
RchiOBHm_Chr4g0418211	--	--	--	--	--	--	-5.88382	0.0007	0.0253552	basic 7S globulin 2-like	basic 7S globulin 2-like [Rosa chinensis]	F:GO:0004190; P:GO:0006508	--
RchiOBHm_Chr4g0418401	--	--	--	--	--	--	-3.11154	0.00135	0.04063	adenylate isopentenyltransferase 5, chloroplastic-like	putative transferase [Rosa chinensis]	P:GO:0008033	K10760 map00908 Zeatin biosynthesis
RchiOBHm_Chr4g0419021	--	--	--	-1.8745	0.00055	0.0211442	--	--	--	membrane protein PM19L	membrane protein PM19L [Rosa chinensis]	--	--
RchiOBHm_Chr4g0419281	--	--	--	--	--	--	1.69579	0.0012	0.0373427	calcium-binding protein 39	calcium-binding protein 39 isoform X1 [Rosa chinensis]	F:GO:0005488	--
RchiOBHm_Chr4g0419681	--	--	--	--	--	--	#NAME?	0.00035	0.015033	uncharacterized LOC112200002	putative ribosomal protein L17 [Rosa chinensis]	F:GO:0003735; C:GO:0005840; C:GO:0005622; P:GO:0006412	--
RchiOBHm_Chr4g0420341	--	--	--	-1.94756	0.0003	0.0134078	--	--	--	receptor-like cytosolic serine/threonine-protein kinase RBK2	receptor-like cytosolic serine/threonine-protein kinase RBK2 [Rosa chinensis]	F:GO:0005524; F:GO:0004672; P:GO:0006468	--
RchiOBHm_Chr4g0420971	--	--	--	--	--	--	-2.8056	5e-05	0.00322834	inactive beta-amylase 9	inactive beta-amylase 9 [Rosa chinensis]	P:GO:0005975; P:GO:0000272; F:GO:0016161	--
RchiOBHm_Chr4g0421251	1.72782	0.00035	0.015033	--	--	--	--	--	--	CASP-like protein 1E1	CASP-like protein 1E1 [Rosa chinensis]	--	--
RchiOBHm_Chr4g0422131	--	--	--	--	--	--	-1.44837	0.00175	0.0488412	alanine--tRNA ligase	uncharacterized protein LOC112198009 [Rosa chinensis]	F:GO:0000166; F:GO:0003676; F:GO:0005524; F:GO:0004813; P:GO:0006419	--
RchiOBHm_Chr4g0422901	--	--	--	-2.67795	0.0011	0.0351307	--	--	--	phylloplanin-like	phylloplanin-like [Rosa chinensis]	--	--
RchiOBHm_Chr4g0423331	-1.54943	0.00165	0.0467628	--	--	--	-2.12118	0.0003	0.0134078	RING-H2 finger protein ATL2	RING-H2 finger protein ATL2 [Rosa chinensis]	F:GO:0008270; F:GO:0005515	--
RchiOBHm_Chr4g0423721	--	--	--	--	--	--	-2.77332	5e-05	0.00322834	major allergen Pru av 1-like	major allergen Pru av 1-like [Rosa chinensis]	P:GO:0009607; P:GO:0006952	--
RchiOBHm_Chr4g0423881	--	--	--	2.44945	0.00175	0.0488412	--	--	--	major allergen Pru av 1-like	putative START-like domain, Bet v I type allergen [Rosa chinensis]	P:GO:0009607; P:GO:0006952	--
RchiOBHm_Chr4g0423961	--	--	--	--	--	--	-2.67865	5e-05	0.00322834	major allergen Pru av 1-like	major allergen Pru av 1-like [Rosa chinensis]	P:GO:0009607; P:GO:0006952	--
RchiOBHm_Chr4g0423971	--	--	--	--	--	--	-2.99611	0.00155	0.0447056	major allergen Pru ar 1-like	major allergen Pru ar 1-like [Rosa chinensis]	P:GO:0009607; P:GO:0006952	--
RchiOBHm_Chr4g0424011	-2.19619	5e-05	0.00322834	--	--	--	-3.11594	5e-05	0.00322834	major allergen Pru ar 1-like	major allergen Pru ar 1-like [Rosa chinensis]	P:GO:0009607; P:GO:0006952	--
RchiOBHm_Chr4g0424381	3.15017	5e-05	0.00322834	3.41397	5e-05	0.00322834	-1.9809	0.00125	0.0385361	putative beta-D-xylosidase	putative beta-D-xylosidase [Rosa chinensis]	P:GO:0005975	K15920 map00520 Amino sugar and nucleotide sugar metabolism
RchiOBHm_Chr4g0425171	-1.85981	0.0004	0.0166112	--	--	--	-2.59471	5e-05	0.00322834	major allergen Pru av 1-like	major allergen Pru av 1-like [Rosa chinensis]	P:GO:0009607; P:GO:0006952	--
RchiOBHm_Chr4g0425181	-1.7525	0.0002	0.00978718	--	--	--	-2.98451	5e-05	0.00322834	major allergen Pru ar 1-like	major allergen Pru ar 1-like [Rosa chinensis]	P:GO:0009607; P:GO:0006952	--
RchiOBHm_Chr4g0425321	2.19971	0.0016	0.0457597	--	--	--	--	--	--	uncharacterized LOC112198012	putative protein kinase TKL-CTR1-DRK-2 family [Rosa chinensis]	F:GO:0005524; F:GO:0004672; P:GO:0006468	--
RchiOBHm_Chr4g0425671	-2.69401	5e-05	0.00322834	-1.86738	0.00055	0.0211442	--	--	--	putative calmodulin-like protein 2	putative calmodulin-like protein 2 [Rosa chinensis]	F:GO:0005509	K02183 map04016 MAPK signaling pathway - plant
RchiOBHm_Chr4g0425781	--	--	--	--	--	--	-2.11399	5e-05	0.00322834	transcription factor bHLH147-like	transcription factor bHLH147-like [Rosa chinensis]	F:GO:0046983	--
RchiOBHm_Chr4g0426181	--	--	--	--	--	--	-2.07743	0.00095	0.0315944	transcription factor MYB108	transcription factor MYB108 [Rosa chinensis]	F:GO:0003677	--
RchiOBHm_Chr4g0426261	--	--	--	4.11631	5e-05	0.00322834	2.24247	0.0011	0.0351307	galactinol synthase 2	galactinol synthase 2 [Rosa chinensis]	--	K18819 map00052 Galactose metabolism
RchiOBHm_Chr4g0426531	-3.76176	5e-05	0.00322834	-5.49206	0.0003	0.0134078	--	--	--	polygalacturonase At1g48100	polygalacturonase At1g48100 [Rosa chinensis]	P:GO:0005975; F:GO:0004650	K01213 map00040 Pentose and glucuronate interconversions
RchiOBHm_Chr4g0427571	--	--	--	--	--	--	-2.52916	0.0007	0.0253552	CBL-interacting serine/threonine-protein kinase 1	CBL-interacting serine/threonine-protein kinase 1 [Rosa chinensis]	F:GO:0005524; P:GO:0007165; F:GO:0004672; P:GO:0006468	--
RchiOBHm_Chr4g0427611	-3.67502	5e-05	0.00322834	-3.03681	5e-05	0.00322834	--	--	--	uncharacterized protein ECU03_1610	uncharacterized protein ECU03_1610 [Rosa chinensis]	--	--
RchiOBHm_Chr4g0427871	--	--	--	--	--	--	2.44641	5e-05	0.00322834	protein CHUP1, chloroplastic	protein CHUP1, chloroplastic [Rosa chinensis]	--	--
RchiOBHm_Chr4g0428031	--	--	--	--	--	--	3.81784	5e-05	0.00322834	transcription factor HY5-like	putative transcription factor bZIP family [Rosa chinensis]	F:GO:0043565	K16241 map04712 Circadian rhythm - plant
RchiOBHm_Chr4g0428361	--	--	--	--	--	--	-2.11666	0.0004	0.0166112	respiratory burst oxidase homolog protein D	respiratory burst oxidase homolog protein D [Rosa chinensis]	F:GO:0004601; F:GO:0016491; F:GO:0005509; C:GO:0016020; P:GO:0055114	K13447 map04016 MAPK signaling pathway - plant
RchiOBHm_Chr4g0428381	-1.75634	0.00135	0.04063	--	--	--	-4.69537	0.0001	0.00572684	uncharacterized LOC112199824	uncharacterized protein LOC112199824 [Rosa chinensis]	--	--
RchiOBHm_Chr4g0429011	--	--	--	--	--	--	-4.28838	5e-05	0.00322834	light-regulated protein 1, chloroplastic	putative light regulated Lir1 [Rosa chinensis]	--	--
RchiOBHm_Chr4g0429271	-2.4923	0.00125	0.0385361	--	--	--	-2.46557	0.00075	0.026584	protein TIFY 9	protein TIFY 9 isoform X1 [Rosa chinensis]	--	K13464 map04075 Plant hormone signal transduction
RchiOBHm_Chr4g0429381	--	--	--	1.82394	0.001	0.0328082	--	--	--	leucine-rich repeat protein 1-like	leucine-rich repeat protein 1-like [Rosa chinensis]	F:GO:0005515	K13416 map04016 MAPK signaling pathway - plant
RchiOBHm_Chr4g0429561	--	--	--	--	--	--	2.01549	0.0014	0.0416089	formin-1	formin-1 [Rosa chinensis]	--	--
RchiOBHm_Chr4g0429721	--	--	--	--	--	--	2.60998	5e-05	0.00322834	glucose-6-phosphate 1-dehydrogenase 2, chloroplastic	glucose-6-phosphate 1-dehydrogenase 2, chloroplastic [Rosa chinensis]	F:GO:0050661; P:GO:0055114; P:GO:0006006; F:GO:0004345	K00036 map00030 Pentose phosphate pathway
RchiOBHm_Chr4g0429971	-1.91214	0.00065	0.0239894	--	--	--	--	--	--	uncharacterized LOC112198124	hypothetical protein RchiOBHm_Chr4g0429971 [Rosa chinensis]	--	--
RchiOBHm_Chr4g0430281	-2.04285	5e-05	0.00322834	-1.80662	0.00025	0.0115953	--	--	--	REF/SRPP-like protein At1g67360	REF/SRPP-like protein At1g67360 [Rosa chinensis]	--	--
RchiOBHm_Chr4g0431051	-2.90482	0.00105	0.0339528	-3.44968	0.0001	0.00572684	--	--	--	uncharacterized LOC112196626	uncharacterized protein LOC112196626 [Rosa chinensis]	--	--
RchiOBHm_Chr4g0431871	--	--	--	--	--	--	-2.9305	0.0002	0.00978718	vinorine synthase-like	vinorine synthase-like [Rosa chinensis]	--	K13065 map00940 Phenylpropanoid biosynthesis
RchiOBHm_Chr4g0431921	-2.91196	5e-05	0.00322834	-2.64089	5e-05	0.00322834	-2.9269	5e-05	0.00322834	small heat shock protein, chloroplastic-like	small heat shock protein, chloroplastic-like [Rosa chinensis]	--	K13993 map04141 Protein processing in endoplasmic reticulum
RchiOBHm_Chr4g0432291	-1.59349	0.00105	0.0339528	-1.57343	0.00145	0.0426478	--	--	--	probable pectate lyase 5	probable pectate lyase 5 [Rosa chinensis]	--	K01728 map00040 Pentose and glucuronate interconversions
RchiOBHm_Chr4g0432851	--	--	--	--	--	--	1.92529	5e-05	0.00322834	protein DETOXIFICATION 29-like	protein DETOXIFICATION 29-like [Rosa chinensis]	P:GO:0006855; P:GO:0055085; F:GO:0015297; C:GO:0016020; F:GO:0015238	--
RchiOBHm_Chr4g0433131	-2.82394	5e-05	0.00322834	-1.48245	0.0015	0.0436334	-1.64759	0.0014	0.0416089	probable E3 ubiquitin-protein ligase XERICO	probable E3 ubiquitin-protein ligase XERICO [Rosa chinensis]	F:GO:0008270; F:GO:0005515	--
RchiOBHm_Chr4g0433231	--	--	--	--	--	--	2.76094	5e-05	0.00322834	high affinity nitrate transporter 2.5-like	high affinity nitrate transporter 2.5-like [Rosa chinensis]	P:GO:0055085; C:GO:0016021	K02575 map00910 Nitrogen metabolism
RchiOBHm_Chr4g0434441	--	--	--	--	--	--	2.27603	5e-05	0.00322834	uncharacterized LOC112196280	uncharacterized protein LOC112196280 [Rosa chinensis]	--	--
RchiOBHm_Chr4g0434741	-2.88342	0.00105	0.0339528	--	--	--	--	--	--	uncharacterized LOC112197448	uncharacterized protein LOC112197448 [Rosa chinensis]	F:GO:0008375; C:GO:0016020	--
RchiOBHm_Chr4g0434751	--	--	--	--	--	--	-1.83361	0.00065	0.0239894	uncharacterized LOC112197449	uncharacterized protein LOC112197449 [Rosa chinensis]	F:GO:0008375; C:GO:0016020	--
RchiOBHm_Chr4g0435001	-2.51122	5e-05	0.00322834	-1.77735	0.00025	0.0115953	-1.85298	0.00015	0.00788832	uncharacterized LOC112198064	uncharacterized protein LOC112198064 [Rosa chinensis]	--	--
RchiOBHm_Chr4g0435151	--	--	--	2.56381	5e-05	0.00322834	3.72097	5e-05	0.00322834	ribulose bisphosphate carboxylase small chain 1, chloroplastic-like	ribulose bisphosphate carboxylase small chain 1, chloroplastic-like isoform X1 [Rosa chinensis]	--	K01602 map00630 Glyoxylate and dicarboxylate metabolism
RchiOBHm_Chr4g0435191	--	--	--	--	--	--	-4.40086	5e-05	0.00322834	zinc finger protein CONSTANS-LIKE 16-like	zinc finger protein CONSTANS-LIKE 16-like [Rosa chinensis]	F:GO:0008270; F:GO:0005515; C:GO:0005622	--
RchiOBHm_Chr4g0435251	-4.84193	0.0002	0.00978718	-4.17176	0.0002	0.00978718	-1.9728	0.00115	0.0362702	tetraketide alpha-pyrone reductase 2-like	tetraketide alpha-pyrone reductase 2-like [Rosa chinensis]	F:GO:0050662; F:GO:0003824	--
RchiOBHm_Chr4g0435331	-3.91035	5e-05	0.00322834	-3.23169	5e-05	0.00322834	-1.88174	0.00075	0.026584	protein NIM1-INTERACTING 2-like	protein NIM1-INTERACTING 2-like [Rosa chinensis]	--	--
RchiOBHm_Chr4g0435381	-1.85355	0.0002	0.00978718	--	--	--	-1.78835	0.00045	0.0182298	uncharacterized LOC112200390	uncharacterized protein LOC112200390 [Rosa chinensis]	--	--
RchiOBHm_Chr4g0435631	-2.77092	0.00035	0.015033	-2.80217	5e-05	0.00322834	--	--	--	protein ASPARTIC PROTEASE IN GUARD CELL 1	protein ASPARTIC PROTEASE IN GUARD CELL 1 [Rosa chinensis]	F:GO:0004190; P:GO:0006508	--
RchiOBHm_Chr4g0435751	-2.57418	0.0011	0.0351307	--	--	--	-3.18325	0.0015	0.0436334	allene oxide cyclase, chloroplastic-like	allene oxide cyclase, chloroplastic-like [Rosa chinensis]	C:GO:0009507; F:GO:0016853	K10525 map00592 alpha-Linolenic acid metabolism
RchiOBHm_Chr4g0435771	--	--	--	--	--	--	-3.81223	5e-05	0.00322834	AP2/ERF and B3 domain-containing transcription repressor RAV2-like	AP2/ERF and B3 domain-containing transcription repressor RAV2-like [Rosa chinensis]	F:GO:0003677	--
RchiOBHm_Chr4g0435881	--	--	--	--	--	--	1.93865	0.0004	0.0166112	leucoanthocyanidin reductase-like	leucoanthocyanidin reductase-like [Rosa chinensis]	--	K13081 map00941 Flavonoid biosynthesis
RchiOBHm_Chr4g0436761	--	--	--	--	--	--	2.02104	0.001	0.0328082	S-adenosylmethionine decarboxylase proenzyme	S-adenosylmethionine decarboxylase proenzyme [Rosa chinensis]	P:GO:0008295; P:GO:0006597; F:GO:0004014	K01611 map00270 Cysteine and methionine metabolism
RchiOBHm_Chr4g0437101	--	--	--	--	--	--	-2.08125	0.0017	0.0477705	amino acid transporter AVT6A-like	amino acid transporter AVT6A-like [Rosa chinensis]	--	--
RchiOBHm_Chr4g0437381	--	--	--	-2.6873	0.00085	0.0292322	--	--	--	cytosolic sulfotransferase 12-like	cytosolic sulfotransferase 12-like [Rosa chinensis]	F:GO:0008146	--
RchiOBHm_Chr4g0437631	1.48311	0.0011	0.0351307	1.60008	0.0007	0.0253552	--	--	--	cytochrome P450 CYP749A22-like	cytochrome P450 CYP749A22-like [Rosa chinensis]	F:GO:0005506; P:GO:0055114; F:GO:0020037	K15639 map00905 Brassinosteroid biosynthesis
RchiOBHm_Chr4g0438171	--	--	--	--	--	--	-2.02474	5e-05	0.00322834	ninja-family protein AFP1-like	ninja-family protein AFP1-like [Rosa chinensis]	--	--
RchiOBHm_Chr4g0439361	-1.784	0.00045	0.0182298	-1.77006	0.0009	0.0303727	1.88538	0.0001	0.00572684	uncharacterized LOC112200641	uncharacterized protein LOC112200641 [Rosa chinensis]	--	--
RchiOBHm_Chr4g0439451	--	--	--	--	--	--	-3.9231	5e-05	0.00322834	NAC transcription factor 29-like	putative transcription factor NAM family [Rosa chinensis]	F:GO:0003677	--
RchiOBHm_Chr4g0439481	-1.6903	0.00065	0.0239894	--	--	--	--	--	--	photosynthetic NDH subunit of lumenal location 2, chloroplastic	photosynthetic NDH subunit of lumenal location 2, chloroplastic [Rosa chinensis]	F:GO:0005509; C:GO:0009523; C:GO:0009654; P:GO:0015979; C:GO:0019898	K08901 map00195 Photosynthesis
RchiOBHm_Chr4g0439611	--	--	--	-1.67549	0.00035	0.015033	--	--	--	cyclic dof factor 3-like	cyclic dof factor 3-like [Rosa chinensis]	F:GO:0003677	--
RchiOBHm_Chr4g0440091	--	--	--	--	--	--	-1.72444	0.00075	0.026584	F-box/kelch-repeat protein SKIP11-like	F-box/kelch-repeat protein SKIP11-like [Rosa chinensis]	F:GO:0005515	--
RchiOBHm_Chr4g0440871	-1.52568	0.00175	0.0488412	--	--	--	--	--	--	probable ribose-5-phosphate isomerase 2	probable ribose-5-phosphate isomerase 2 [Rosa chinensis]	F:GO:0004751	K01807 map00030 Pentose phosphate pathway
RchiOBHm_Chr4g0440921	-2.02997	5e-05	0.00322834	--	--	--	-2.04293	5e-05	0.00322834	uncharacterized LOC112198161	hypothetical protein RchiOBHm_Chr4g0440921 [Rosa chinensis]	--	--
RchiOBHm_Chr4g0440991	--	--	--	--	--	--	2.35684	5e-05	0.00322834	heavy metal-associated isoprenylated plant protein 20-like	heavy metal-associated isoprenylated plant protein 20-like [Rosa chinensis]	F:GO:0046872; P:GO:0030001	--
RchiOBHm_Chr4g0441251	-1.53002	0.0011	0.0351307	--	--	--	--	--	--	leucine-rich repeat extensin-like protein 3	leucine-rich repeat extensin-like protein 3 [Rosa chinensis]	--	--
RchiOBHm_Chr4g0441311	1.79579	0.0005	0.0197317	--	--	--	--	--	--	auxin efflux carrier component 3-like	auxin efflux carrier component 3-like [Rosa chinensis]	P:GO:0055085; C:GO:0016021	--
RchiOBHm_Chr4g0441341	--	--	--	2.15993	0.0005	0.0197317	--	--	--	serine carboxypeptidase-like 50	serine carboxypeptidase-like 50 [Rosa chinensis]	P:GO:0006508; F:GO:0004185	--
RchiOBHm_Chr4g0441491	-1.68837	0.00035	0.015033	--	--	--	--	--	--	10 kDa chaperonin, mitochondrial-like	10 kDa chaperonin, mitochondrial-like [Rosa chinensis]	C:GO:0005737; P:GO:0006457	--
RchiOBHm_Chr4g0441801	--	--	--	-2.98136	5e-05	0.00322834	--	--	--	phosphomannomutase/phosphoglucomutase	uncharacterized protein LOC112198314 isoform X1 [Rosa chinensis]	P:GO:0005975	--
RchiOBHm_Chr4g0441811	-2.89187	5e-05	0.00322834	-3.29371	5e-05	0.00322834	--	--	--	protein C2-DOMAIN ABA-RELATED 9-like	protein C2-DOMAIN ABA-RELATED 9-like [Rosa chinensis]	F:GO:0005515	--
RchiOBHm_Chr4g0441871	1.48361	0.00175	0.0488412	1.50301	0.00135	0.04063	--	--	--	pyrrolidone-carboxylate peptidase	putative pyroglutamyl-peptidase I [Rosa chinensis]	--	--
RchiOBHm_Chr4g0441951	--	--	--	-2.24039	0.0017	0.0477705	--	--	--	uncharacterized LOC112199936	uncharacterized protein LOC112199936 [Rosa chinensis]	--	--
RchiOBHm_Chr4g0441991	--	--	--	--	--	--	-3.06182	0.0014	0.0416089	F-box/kelch-repeat protein At1g23390	F-box/kelch-repeat protein At1g23390 [Rosa chinensis]	F:GO:0005515	--
RchiOBHm_Chr4g0442301	-3.5225	5e-05	0.00322834	--	--	--	-2.81065	5e-05	0.00322834	U-box domain-containing protein 21-like	U-box domain-containing protein 21-like [Rosa chinensis]	F:GO:0004842; F:GO:0005488; P:GO:0016567	--
RchiOBHm_Chr4g0442571	-2.1311	5e-05	0.00322834	-2.20728	5e-05	0.00322834	--	--	--	vacuolar iron transporter 1-like	vacuolar iron transporter 1-like [Rosa chinensis]	--	--
RchiOBHm_Chr4g0442581	-2.80462	0.00025	0.0115953	-2.48818	0.0003	0.0134078	--	--	--	vacuolar iron transporter 1-like	vacuolar iron transporter 1-like [Rosa chinensis]	--	--
RchiOBHm_Chr4g0442641	--	--	--	--	--	--	-2.11416	0.00085	0.0292322	alpha,alpha-trehalose-phosphate synthase [UDP-forming] 6-like	alpha,alpha-trehalose-phosphate synthase [UDP-forming]	F:GO:0003824; P:GO:0005992	K16055 map00500 Starch and sucrose metabolism
RchiOBHm_Chr4g0442801	3.90183	5e-05	0.00322834	4.08629	5e-05	0.00322834	4.72406	5e-05	0.00322834	adagio protein 3	adagio protein 3 [Rosa chinensis]	F:GO:0005515	K12116 map04712 Circadian rhythm - plant
RchiOBHm_Chr4g0443251	--	--	--	1.67521	0.0003	0.0134078	--	--	--	1-aminocyclopropane-1-carboxylate oxidase homolog 4-like	1-aminocyclopropane-1-carboxylate oxidase homolog 4-like [Rosa chinensis]	F:GO:0016491; P:GO:0055114	--
RchiOBHm_Chr4g0443491	-2.04741	5e-05	0.00322834	--	--	--	--	--	--	21 kDa protein-like	21 kDa protein-like [Rosa chinensis]	F:GO:0004857	--
RchiOBHm_Chr4g0443571	-1.71222	0.0017	0.0477705	-2.20862	0.0001	0.00572684	--	--	--	probable NAD(P)H dehydrogenase subunit CRR3, chloroplastic	probable NAD(P)H dehydrogenase subunit CRR3, chloroplastic [Rosa chinensis]	--	--
RchiOBHm_Chr4g0443631	-3.0671	0.0008	0.027924	--	--	--	--	--	--	polygalacturonase At1g48100-like	polygalacturonase At1g48100-like [Rosa chinensis]	P:GO:0005975; F:GO:0004650	K01213 map00040 Pentose and glucuronate interconversions
RchiOBHm_Chr4g0443641	--	--	--	--	--	--	-3.70382	5e-05	0.00322834	1,4-dihydroxy-2-naphthoyl-CoA synthase, peroxisomal	1,4-dihydroxy-2-naphthoyl-CoA synthase, peroxisomal [Rosa chinensis]	F:GO:0003824; P:GO:0008152; P:GO:0009234	K01661 map00130 Ubiquinone and other terpenoid-quinone biosynthesis
RchiOBHm_Chr4g0443731	--	--	--	-2.14783	0.00175	0.0488412	--	--	--	uncharacterized LOC112200210	uncharacterized protein LOC112200210 [Rosa chinensis]	--	--
RchiOBHm_Chr4g0443781	--	--	--	--	--	--	-1.88372	0.00025	0.0115953	uncharacterized LOC112197424	uncharacterized protein LOC112197424 [Rosa chinensis]	--	--
RchiOBHm_Chr4g0443861	-2.03535	0.0009	0.0303727	-2.56076	5e-05	0.00322834	--	--	--	polygalacturonase 1 beta-like protein 3	polygalacturonase 1 beta-like protein 3 [Rosa chinensis]	--	--
RchiOBHm_Chr4g0443881	-1.9944	0.00035	0.015033	-1.93078	0.0003	0.0134078	--	--	--	2-methylene-furan-3-one reductase	2-methylene-furan-3-one reductase [Rosa chinensis]	F:GO:0008270; F:GO:0016491; P:GO:0055114	--
RchiOBHm_Chr4g0443981	-2.26644	5e-05	0.00322834	-1.94876	0.0001	0.00572684	-3.257	5e-05	0.00322834	U-box domain-containing protein 19	U-box domain-containing protein 19 [Rosa chinensis]	F:GO:0004842; F:GO:0005515; F:GO:0005488; P:GO:0016567	--
RchiOBHm_Chr4g0443991	--	--	--	--	--	--	4.73414	0.0014	0.0416089	probable xyloglucan endotransglucosylase/hydrolase protein 33	probable xyloglucan endotransglucosylase/hydrolase protein 33 isoform X1 [Rosa chinensis]	P:GO:0005975; P:GO:0006073; C:GO:0005618; C:GO:0048046; F:GO:0016762; P:GO:0010411; P:GO:0042546	--
RchiOBHm_Chr4g0444321	-2.13472	0.00135	0.04063	-2.4453	0.0003	0.0134078	--	--	--	MLP-like protein 423	MLP-like protein 423 [Rosa chinensis]	P:GO:0009607; P:GO:0006952	--
RchiOBHm_Chr4g0444561	-2.58566	0.0012	0.0373427	--	--	--	--	--	--	17.8 kDa class I heat shock protein-like	putative small heat shock protein HSP20 [Rosa chinensis]	--	K13993 map04141 Protein processing in endoplasmic reticulum
RchiOBHm_Chr4g0444701	-5.02408	5e-05	0.00322834	-4.60117	5e-05	0.00322834	-3.80062	5e-05	0.00322834	IAA-amino acid hydrolase ILR1-like 1	IAA-amino acid hydrolase ILR1-like 1 [Rosa chinensis]	P:GO:0008152; F:GO:0016787	--
RchiOBHm_Chr4g0444751	--	--	--	1.88554	0.00065	0.0239894	--	--	--	protein JINGUBANG	protein JINGUBANG [Rosa chinensis]	F:GO:0005515	--
RchiOBHm_Chr4g0444871	-1.73158	0.0006	0.0226208	-1.83662	5e-05	0.00322834	--	--	--	probable galacturonosyltransferase-like 9	probable galacturonosyltransferase-like 9 [Rosa chinensis]	--	--
RchiOBHm_Chr4g0444931	--	--	--	--	--	--	-2.43263	5e-05	0.00322834	TORTIFOLIA1-like protein 4	TORTIFOLIA1-like protein 4 [Rosa chinensis]	F:GO:0005515; F:GO:0005488	--
RchiOBHm_Chr4g0445201	-2.4803	0.0001	0.00572684	-2.36461	0.0002	0.00978718	--	--	--	glutathione S-transferase U17-like	glutathione S-transferase U17-like [Rosa chinensis]	F:GO:0005515	K00799 map00480 Glutathione metabolism
RchiOBHm_Chr4g0445431	-2.66234	5e-05	0.00322834	--	--	--	-3.67348	5e-05	0.00322834	D-galacturonate reductase	D-galacturonate reductase [Rosa chinensis]	F:GO:0016491; P:GO:0055114	--
RchiOBHm_Chr4g0445581	1.4056	0.00165	0.0467628	1.47939	0.00105	0.0339528	--	--	--	protein NRT1/ PTR FAMILY 8.3-like	protein NRT1/ PTR FAMILY 8.3-like [Rosa chinensis]	P:GO:0006857; C:GO:0016020; P:GO:0006810; F:GO:0005215	--
RchiOBHm_Chr4g0446191	--	--	--	--	--	--	-2.43979	0.0001	0.00572684	uncharacterized LOC112197789	uncharacterized protein LOC112197789 [Rosa chinensis]	F:GO:0015035; F:GO:0009055; P:GO:0045454; P:GO:0035556	--
RchiOBHm_Chr4g0446431	-2.02441	0.0001	0.00572684	-1.8139	0.00045	0.0182298	--	--	--	tricalbin-3	tricalbin-3 [Rosa chinensis]	F:GO:0005515	--
RchiOBHm_Chr4g0446831	--	--	--	--	--	--	2.55275	5e-05	0.00322834	chaperone protein dnaJ C76, chloroplastic	chaperone protein dnaJ C76, chloroplastic [Rosa chinensis]	--	--
RchiOBHm_Chr4g0447301	-1.54311	0.0015	0.0436334	--	--	--	--	--	--	ferredoxin-thioredoxin reductase, variable chain, chloroplastic-like	ferredoxin-thioredoxin reductase, variable chain, chloroplastic-like [Rosa chinensis]	P:GO:0015979; F:GO:0016992; P:GO:0009107	--
RchiOBHm_Chr5g0000211	-2.26452	5e-05	0.00322834	-3.12623	5e-05	0.00322834	--	--	--	probable galactinol--sucrose galactosyltransferase 2	probable galactinol--sucrose galactosyltransferase 2 [Rosa chinensis]	F:GO:0003824	K06617 map00052 Galactose metabolism
RchiOBHm_Chr5g0000691	1.86539	0.0005	0.0197317	2.36012	5e-05	0.00322834	--	--	--	uncharacterized LOC112164895	uncharacterized protein LOC112164895 [Rosa chinensis]	--	--
RchiOBHm_Chr5g0000731	-1.61406	0.0017	0.0477705	--	--	--	--	--	--	uncharacterized LOC112166110	uncharacterized protein LOC112166110 [Rosa chinensis]	--	--
RchiOBHm_Chr5g0000791	--	--	--	--	--	--	1.63838	0.00065	0.0239894	CASP-like protein 2B1	CASP-like protein 2B1 [Rosa chinensis]	--	--
RchiOBHm_Chr5g0000981	--	--	--	--	--	--	-1.64771	0.00035	0.015033	inositol transporter 4-like	inositol transporter 4-like [Rosa chinensis]	F:GO:0022891; P:GO:0055085; F:GO:0022857; C:GO:0016020; C:GO:0016021; F:GO:0005215	--
RchiOBHm_Chr5g0001021	-1.48253	0.0016	0.0457597	--	--	--	--	--	--	cytochrome b561 and DOMON domain-containing protein At4g17280-like	cytochrome b561 and DOMON domain-containing protein At4g17280-like [Rosa chinensis]	--	--
RchiOBHm_Chr5g0001371	--	--	--	--	--	--	-3.07387	5e-05	0.00322834	tonoplast dicarboxylate transporter-like	tonoplast dicarboxylate transporter-like [Rosa chinensis]	P:GO:0006814; P:GO:0055085; C:GO:0016020; F:GO:0005215	--
RchiOBHm_Chr5g0001521	-3.09325	0.0001	0.00572684	-2.0063	0.0002	0.00978718	--	--	--	acyl-CoA--sterol O-acyltransferase 1-like	acyl-CoA--sterol O-acyltransferase 1-like isoform X1 [Rosa chinensis]	F:GO:0008374	--
RchiOBHm_Chr5g0001631	--	--	--	2.45041	0.00025	0.0115953	--	--	--	uncharacterized LOC112166408	uncharacterized protein LOC112166408 [Rosa chinensis]	--	--
RchiOBHm_Chr5g0002301	--	--	--	--	--	--	2.08965	0.00055	0.0211442	protein STRUBBELIG-RECEPTOR FAMILY 8	putative non-specific protein-tyrosine kinase RLK-Pelle-LRR-V family [Rosa chinensis]	F:GO:0005524; F:GO:0005515; F:GO:0004672; P:GO:0006468	--
RchiOBHm_Chr5g0002561	--	--	--	--	--	--	-1.68405	0.0013	0.0396058	probable WRKY transcription factor 31	probable WRKY transcription factor 31 [Rosa chinensis]	F:GO:0043565	--
RchiOBHm_Chr5g0002601	-3.45685	0.00015	0.00788832	--	--	--	-2.39389	0.00075	0.026584	putative methyltransferase DDB_G0268948	putative methyltransferase DDB_G0268948 [Rosa chinensis]	P:GO:0008152; F:GO:0008168	--
RchiOBHm_Chr5g0002711	--	--	--	-2.46975	0.0007	0.0253552	--	--	--	L-ascorbate oxidase homolog	L-ascorbate oxidase homolog [Rosa chinensis]	F:GO:0005507; F:GO:0016491; P:GO:0055114	--
RchiOBHm_Chr5g0003311	--	--	--	--	--	--	1.77495	0.0003	0.0134078	uncharacterized GPI-anchored protein At1g61900	uncharacterized GPI-anchored protein At1g61900 [Rosa chinensis]	--	--
RchiOBHm_Chr5g0003801	--	--	--	--	--	--	6.5998	5e-05	0.00322834	glucose-6-phosphate/phosphate translocator 1, chloroplastic-like	glucose-6-phosphate/phosphate translocator 1, chloroplastic-like [Rosa chinensis]	C:GO:0016021; P:GO:0006810; F:GO:0005215	--
RchiOBHm_Chr5g0003921	--	--	--	--	--	--	1.94224	0.00035	0.015033	probable xyloglucan endotransglucosylase/hydrolase protein 8	probable xyloglucan endotransglucosylase/hydrolase protein 8 [Rosa chinensis]	P:GO:0005975; P:GO:0006073; C:GO:0005618; C:GO:0048046; F:GO:0016762; P:GO:0010411; P:GO:0042546	--
RchiOBHm_Chr5g0004031	--	--	--	--	--	--	2.36023	5e-05	0.00322834	uncharacterized LOC112165801	uncharacterized protein LOC112165801 isoform X1 [Rosa chinensis]	--	--
RchiOBHm_Chr5g0004291	--	--	--	--	--	--	-1.76078	0.00105	0.0339528	cysteine-rich repeat secretory protein 38-like	putative Gnk2-like domain-containing protein [Rosa chinensis]	--	--
RchiOBHm_Chr5g0004481	--	--	--	--	--	--	-2.80372	0.0001	0.00572684	thioredoxin-like protein CXXS1	thioredoxin-like protein CXXS1 [Rosa chinensis]	F:GO:0015035; P:GO:0006662; P:GO:0045454	--
RchiOBHm_Chr5g0004601	-1.67726	0.0017	0.0477705	--	--	--	--	--	--	protein HEAT-STRESS-ASSOCIATED 32	protein HEAT-STRESS-ASSOCIATED 32 [Rosa chinensis]	F:GO:0003824	--
RchiOBHm_Chr5g0004611	--	--	--	--	--	--	2.39801	0.0011	0.0351307	anthocyanidin reductase ((2S)-flavan-3-ol-forming)	anthocyanidin reductase ((2S)-flavan-3-ol-forming) [Rosa chinensis]	F:GO:0050662; F:GO:0003824	K08695 map00941 Flavonoid biosynthesis
RchiOBHm_Chr5g0004711	-4.79264	5e-05	0.00322834	-5.15497	5e-05	0.00322834	-3.19434	5e-05	0.00322834	(3S,6E)-nerolidol synthase 1-like	(3S,6E)-nerolidol synthase 1-like [Rosa chinensis]	F:GO:0000287; P:GO:0008152; F:GO:0016829; F:GO:0010333	K14175 map00909 Sesquiterpenoid and triterpenoid biosynthesis
RchiOBHm_Chr5g0005711	--	--	--	--	--	--	-1.98127	5e-05	0.00322834	uncharacterized LOC112167800	uncharacterized protein LOC112167800 isoform X2 [Rosa chinensis]	--	--
RchiOBHm_Chr5g0006031	-1.77489	0.0008	0.027924	--	--	--	-3.32969	5e-05	0.00322834	transcription factor MYB102	transcription factor MYB102 [Rosa chinensis]	F:GO:0003677	--
RchiOBHm_Chr5g0006121	-2.20649	0.0001	0.00572684	-2.16359	0.0001	0.00572684	--	--	--	uncharacterized LOC112165651	uncharacterized protein LOC112165651 [Rosa chinensis]	--	--
RchiOBHm_Chr5g0006281	-2.22223	0.0001	0.00572684	-2.48466	5e-05	0.00322834	--	--	--	dynein light chain 1, cytoplasmic-like	dynein light chain 1, cytoplasmic-like [Rosa chinensis]	C:GO:0030286; P:GO:0007017	--
RchiOBHm_Chr5g0006291	-2.24096	0.0003	0.0134078	--	--	--	--	--	--	external alternative NAD(P)H-ubiquinone oxidoreductase B2, mitochondrial-like	external alternative NAD(P)H-ubiquinone oxidoreductase B2, mitochondrial-like [Rosa chinensis]	F:GO:0016491; F:GO:0005509; P:GO:0055114	--
RchiOBHm_Chr5g0006301	--	--	--	--	--	--	-2.49479	0.00015	0.00788832	uncharacterized LOC112166320	uncharacterized protein LOC112166320 [Rosa chinensis]	--	--
RchiOBHm_Chr5g0006321	-5.92155	0.0014	0.0416089	-3.69572	0.0001	0.00572684	--	--	--	F-box protein SKIP27-like	F-box protein SKIP27-like [Rosa chinensis]	F:GO:0005515	--
RchiOBHm_Chr5g0006611	--	--	--	--	--	--	-2.25274	5e-05	0.00322834	uncharacterized LOC112166606	uncharacterized protein LOC112166606 [Rosa chinensis]	--	--
RchiOBHm_Chr5g0007461	-2.83008	0.0001	0.00572684	-3.22793	0.0002	0.00978718	--	--	--	uncharacterized LOC112166666	uncharacterized protein LOC112166666 [Rosa chinensis]	--	--
RchiOBHm_Chr5g0008081	--	--	--	--	--	--	-2.27928	5e-05	0.00322834	E3 ubiquitin-protein ligase AIRP2-like	E3 ubiquitin-protein ligase AIRP2-like [Rosa chinensis]	F:GO:0008270; F:GO:0005515	--
RchiOBHm_Chr5g0008521	--	--	--	--	--	--	-1.8418	0.0006	0.0226208	uncharacterized LOC112167846	uncharacterized protein LOC112167846 isoform X2 [Rosa chinensis]	--	--
RchiOBHm_Chr5g0008561	--	--	--	--	--	--	-4.14212	0.0012	0.0373427	uncharacterized LOC112201800	uncharacterized protein LOC112201800 [Rosa chinensis]	--	--
RchiOBHm_Chr5g0008581	--	--	--	--	--	--	-3.81838	0.00025	0.0115953	transcription factor bHLH162-like	transcription factor bHLH162-like [Rosa chinensis]	F:GO:0003677; F:GO:0046983	--
RchiOBHm_Chr5g0008811	-4.12007	5e-05	0.00322834	-2.07969	5e-05	0.00322834	-4.10147	5e-05	0.00322834	cytosolic-abundant heat soluble protein 68135-like	cytosolic-abundant heat soluble protein 68135-like [Rosa chinensis]	--	K00728 map00514 Other types of O-glycan biosynthesis
RchiOBHm_Chr5g0008921	1.82031	0.00125	0.0385361	1.87302	0.00095	0.0315944	-2.65705	5e-05	0.00322834	auxin-repressed 12.5 kDa protein	auxin-repressed 12.5 kDa protein [Rosa chinensis]	--	--
RchiOBHm_Chr5g0008991	--	--	--	--	--	--	-2.66929	5e-05	0.00322834	ethylene-responsive transcription factor 4-like	ethylene-responsive transcription factor 4-like [Rosa chinensis]	F:GO:0003677	--
RchiOBHm_Chr5g0010101	--	--	--	--	--	--	3.10065	0.0002	0.00978718	3'-N-debenzoyl-2'-deoxytaxol N-benzoyltransferase	3'-N-debenzoyl-2'-deoxytaxol N-benzoyltransferase [Rosa chinensis]	--	--
RchiOBHm_Chr5g0010331	--	--	--	--	--	--	2.48317	0.0005	0.0197317	protein trichome birefringence-like 38	protein trichome birefringence-like 38 [Rosa chinensis]	--	--
RchiOBHm_Chr5g0010401	--	--	--	--	--	--	2.69438	5e-05	0.00322834	senescence-specific cysteine protease SAG12-like	senescence-specific cysteine protease SAG12-like [Rosa chinensis]	P:GO:0006508; F:GO:0008234	K01365 map04145 Phagosome
RchiOBHm_Chr5g0010631	--	--	--	--	--	--	1.7126	0.00085	0.0292322	transcription factor bHLH30-like	transcription factor bHLH30-like [Rosa chinensis]	F:GO:0046983	--
RchiOBHm_Chr5g0010741	2.00509	0.00015	0.00788832	--	--	--	-2.97062	5e-05	0.00322834	heavy metal-associated isoprenylated plant protein 29	heavy metal-associated isoprenylated plant protein 29 [Rosa chinensis]	F:GO:0046872; P:GO:0030001	--
RchiOBHm_Chr5g0011061	-2.31401	5e-05	0.00322834	-5.968	5e-05	0.00322834	-6.06624	5e-05	0.00322834	CBL-interacting serine/threonine-protein kinase 20	CBL-interacting serine/threonine-protein kinase 20 [Rosa chinensis]	F:GO:0005524; P:GO:0007165; F:GO:0004672; P:GO:0006468	--
RchiOBHm_Chr5g0011071	--	--	--	-1.97867	0.00015	0.00788832	-1.72819	0.0005	0.0197317	CBL-interacting serine/threonine-protein kinase 12-like	CBL-interacting serine/threonine-protein kinase 12-like [Rosa chinensis]	F:GO:0005524; P:GO:0007165; F:GO:0004672; P:GO:0006468	--
RchiOBHm_Chr5g0011511	-2.54239	0.0001	0.00572684	-2.17849	5e-05	0.00322834	-1.93959	0.00065	0.0239894	uncharacterized LOC112168065	uncharacterized protein LOC112168065 [Rosa chinensis]	--	--
RchiOBHm_Chr5g0011661	--	--	--	--	--	--	-4.03939	5e-05	0.00322834	precursor of CEP14	precursor of CEP14 [Rosa chinensis]	--	--
RchiOBHm_Chr5g0011801	--	--	--	--	--	--	-2.09542	5e-05	0.00322834	probable alpha,alpha-trehalose-phosphate synthase [UDP-forming] 7	probable alpha,alpha-trehalose-phosphate synthase [UDP-forming]	F:GO:0003824; P:GO:0005992	K16055 map00500 Starch and sucrose metabolism
RchiOBHm_Chr5g0012811	--	--	--	-2.05017	0.0002	0.00978718	--	--	--	bidirectional sugar transporter SWEET2a-like	bidirectional sugar transporter SWEET2a-like [Rosa chinensis]	C:GO:0016021	--
RchiOBHm_Chr5g0012921	--	--	--	-3.04688	0.0003	0.0134078	--	--	--	phytochrome E	phytochrome E isoform X2 [Rosa chinensis]	F:GO:0000155; F:GO:0005515; F:GO:0042803; P:GO:0009584; P:GO:0007165; F:GO:0009881; P:GO:0018298; P:GO:0017006	--
RchiOBHm_Chr5g0013131	-3.67416	5e-05	0.00322834	-1.65835	0.0016	0.0457597	-3.65009	5e-05	0.00322834	probable WRKY transcription factor 71	probable WRKY transcription factor 71 [Rosa chinensis]	F:GO:0043565	--
RchiOBHm_Chr5g0013171	--	--	--	1.44048	0.0009	0.0303727	-2.58966	5e-05	0.00322834	probable purine permease 10	probable purine permease 10 [Rosa chinensis]	--	--
RchiOBHm_Chr5g0014331	-2.3431	0.0001	0.00572684	-2.87647	5e-05	0.00322834	--	--	--	9-cis-epoxycarotenoid dioxygenase NCED1, chloroplastic	putative 9-cis-epoxycarotenoid dioxygenase [Rosa chinensis]	P:GO:0055114	K09840 map00906 Carotenoid biosynthesis
RchiOBHm_Chr5g0014381	--	--	--	--	--	--	-3.92328	0.0015	0.0436334	protein TIFY 5A-like	protein TIFY 5A-like [Rosa chinensis]	--	--
RchiOBHm_Chr5g0014951	-1.89684	0.0002	0.00978718	--	--	--	-3.23302	5e-05	0.00322834	uncharacterized LOC112166127	uncharacterized protein LOC112166127 [Rosa chinensis]	--	--
RchiOBHm_Chr5g0014961	1.76653	0.0002	0.00978718	1.52544	0.0016	0.0457597	--	--	--	auxin response factor 6	auxin response factor 6 [Rosa chinensis]	F:GO:0003677; C:GO:0005634; F:GO:0005515; P:GO:0009725	--
RchiOBHm_Chr5g0015021	-2.79842	0.0004	0.0166112	--	--	--	-2.74197	0.00045	0.0182298	phospholipase A1-Igamma1, chloroplastic	phospholipase A1-Igamma1, chloroplastic [Rosa chinensis]	P:GO:0006629	--
RchiOBHm_Chr5g0015071	-1.76099	0.00065	0.0239894	-1.88458	0.00015	0.00788832	--	--	--	BAG family molecular chaperone regulator 3-like	BAG family molecular chaperone regulator 3-like [Rosa chinensis]	F:GO:0005515; F:GO:0051087	--
RchiOBHm_Chr5g0015621	--	--	--	--	--	--	-2.58866	0.0001	0.00572684	cationic amino acid transporter 1-like	cationic amino acid transporter 1-like [Rosa chinensis]	C:GO:0016020; F:GO:0015171; P:GO:0003333	--
RchiOBHm_Chr5g0016001	--	--	--	--	--	--	1.58455	0.00155	0.0447056	ferredoxin--NADP reductase, root isozyme, chloroplastic	ferredoxin--NADP reductase, root isozyme, chloroplastic [Rosa chinensis]	F:GO:0016491; P:GO:0055114	K02641 map00195 Photosynthesis
RchiOBHm_Chr5g0016431	--	--	--	-2.34398	0.00015	0.00788832	--	--	--	probable LRR receptor-like serine/threonine-protein kinase At4g20940	probable LRR receptor-like serine/threonine-protein kinase At4g20940 isoform X1 [Rosa chinensis]	F:GO:0005524; F:GO:0005515; F:GO:0004672; P:GO:0006468	--
RchiOBHm_Chr5g0017501	--	--	--	--	--	--	1.55929	0.001	0.0328082	dihydroceramide fatty acyl 2-hydroxylase FAH1-like	dihydroceramide fatty acyl 2-hydroxylase FAH1-like isoform X3 [Rosa chinensis]	F:GO:0005506; F:GO:0016491; P:GO:0055114; P:GO:0006633	--
RchiOBHm_Chr5g0020091	-3.57743	0.00135	0.04063	--	--	--	--	--	--	protein EXORDIUM-like 7	putative phosphate-induced protein [Rosa chinensis]	--	--
RchiOBHm_Chr5g0021801	-2.10016	0.00015	0.00788832	-2.0494	0.00045	0.0182298	--	--	--	galactan beta-1,4-galactosyltransferase GALS3	galactan beta-1,4-galactosyltransferase GALS3 [Rosa chinensis]	--	--
RchiOBHm_Chr5g0022081	2.23306	5e-05	0.00322834	2.28143	5e-05	0.00322834	--	--	--	plasma membrane-associated cation-binding protein 1	plasma membrane-associated cation-binding protein 1 [Rosa chinensis]	P:GO:0051716; C:GO:0046658	--
RchiOBHm_Chr5g0022491	-2.64906	5e-05	0.00322834	-3.25362	5e-05	0.00322834	-3.69636	5e-05	0.00322834	CTP synthase-like	CTP synthase-like [Rosa chinensis]	P:GO:0006221; F:GO:0003883	K01937 map00240 Pyrimidine metabolism
RchiOBHm_Chr5g0023111	--	--	--	--	--	--	-4.81672	5e-05	0.00322834	18.1 kDa class I heat shock protein-like	18.1 kDa class I heat shock protein-like [Rosa chinensis]	--	K13993 map04141 Protein processing in endoplasmic reticulum
RchiOBHm_Chr5g0024101	--	--	--	--	--	--	2.26322	5e-05	0.00322834	glyceraldehyde-3-phosphate dehydrogenase GAPCP1, chloroplastic-like	glyceraldehyde-3-phosphate dehydrogenase GAPCP1, chloroplastic-like isoform X1 [Rosa chinensis]	F:GO:0050661; F:GO:0051287; P:GO:0055114; P:GO:0006006	K00134 map00010 Glycolysis / Gluconeogenesis
RchiOBHm_Chr5g0026971	--	--	--	--	--	--	-1.88461	0.0005	0.0197317	trinucleotide repeat-containing gene 18 protein	trinucleotide repeat-containing gene 18 protein [Rosa chinensis]	--	--
RchiOBHm_Chr5g0027011	--	--	--	--	--	--	-2.78811	5e-05	0.00322834	NAC domain-containing protein 21/22	NAC domain-containing protein 21/22 [Rosa chinensis]	F:GO:0003677	--
RchiOBHm_Chr5g0027311	--	--	--	--	--	--	-1.74889	0.00125	0.0385361	probable glutathione S-transferase	probable glutathione S-transferase [Rosa chinensis]	F:GO:0005515	K00799 map00480 Glutathione metabolism
RchiOBHm_Chr5g0027901	-4.88463	5e-05	0.00322834	-3.31203	5e-05	0.00322834	-2.57175	5e-05	0.00322834	9-cis-epoxycarotenoid dioxygenase NCED1, chloroplastic-like	9-cis-epoxycarotenoid dioxygenase NCED1, chloroplastic-like [Rosa chinensis]	P:GO:0055114	K09840 map00906 Carotenoid biosynthesis
RchiOBHm_Chr5g0027981	-2.27747	5e-05	0.00322834	--	--	--	--	--	--	gibberellin 2-beta-dioxygenase 1-like	putative gibberellin 2-beta-dioxygenase 1 protein [Rosa chinensis]	F:GO:0016491; P:GO:0055114	K04125 map00904 Diterpenoid biosynthesis
RchiOBHm_Chr5g0028041	-2.77584	5e-05	0.00322834	-2.13024	0.00035	0.015033	--	--	--	heme-binding protein 2	heme-binding protein 2 [Rosa chinensis]	--	--
RchiOBHm_Chr5g0028771	--	--	--	--	--	--	2.93114	0.00015	0.00788832	cytochrome P450 72A15-like	cytochrome P450 72A15-like [Rosa chinensis]	F:GO:0005506; P:GO:0055114; F:GO:0020037	K10717 map00908 Zeatin biosynthesis
RchiOBHm_Chr5g0028851	--	--	--	--	--	--	2.2125	5e-05	0.00322834	probable solanesyl-diphosphate synthase 3, chloroplastic	probable solanesyl-diphosphate synthase 3, chloroplastic [Rosa chinensis]	P:GO:0015979; P:GO:0008299	K05356 map00900 Terpenoid backbone biosynthesis
RchiOBHm_Chr5g0029601	-2.05832	5e-05	0.00322834	-2.43692	5e-05	0.00322834	--	--	--	protein trichome birefringence-like 41	protein trichome birefringence-like 41 [Rosa chinensis]	--	--
RchiOBHm_Chr5g0030581	--	--	--	--	--	--	-1.48192	0.0018	0.0498395	protein transport protein Sec61 subunit alpha-like	PREDICTED: protein transport protein Sec61 subunit alpha [Fragaria vesca subsp. vesca]	P:GO:0015031; C:GO:0016020	K10956 map03060 Protein export
RchiOBHm_Chr5g0031021	--	--	--	--	--	--	-3.24438	0.0013	0.0396058	epidermis-specific secreted glycoprotein EP1-like	epidermis-specific secreted glycoprotein EP1-like [Rosa chinensis]	--	--
RchiOBHm_Chr5g0031031	2.35429	0.00015	0.00788832	4.32405	5e-05	0.00322834	--	--	--	epidermis-specific secreted glycoprotein EP1-like	epidermis-specific secreted glycoprotein EP1-like [Rosa chinensis]	--	--
RchiOBHm_Chr5g0031811	--	--	--	-3.69477	0.0016	0.0457597	--	--	--	basic leucine zipper 34-like	basic leucine zipper 34-like [Rosa chinensis]	F:GO:0043565	--
RchiOBHm_Chr5g0032241	--	--	--	--	--	--	2.05087	5e-05	0.00322834	histone acetyltransferase KAT6B	histone acetyltransferase KAT6B [Rosa chinensis]	--	--
RchiOBHm_Chr5g0032401	1.89424	0.0003	0.0134078	2.18919	5e-05	0.00322834	--	--	--	probable aminotransferase TAT2	probable aminotransferase TAT2 [Rosa chinensis]	F:GO:0030170; F:GO:0003824; F:GO:0008483; P:GO:0006520; P:GO:0009058	K00815 map00130 Ubiquinone and other terpenoid-quinone biosynthesis
RchiOBHm_Chr5g0032721	-1.76904	5e-05	0.00322834	--	--	--	-2.05112	5e-05	0.00322834	ethylene-responsive transcription factor 4	ethylene-responsive transcription factor 4 [Rosa chinensis]	F:GO:0003677	--
RchiOBHm_Chr5g0033881	--	--	--	--	--	--	-2.4657	5e-05	0.00322834	uncharacterized LOC112203564	uncharacterized protein LOC112203564 [Rosa chinensis]	--	K10581 map04120 Ubiquitin mediated proteolysis
RchiOBHm_Chr5g0033911	--	--	--	--	--	--	-2.08172	5e-05	0.00322834	expansin-A12	putative expansin/Lol pI [Rosa chinensis]	P:GO:0009664; C:GO:0005576	--
RchiOBHm_Chr5g0034461	-2.34688	0.0007	0.0253552	-3.07762	0.00015	0.00788832	--	--	--	CBS domain-containing protein CBSX5-like	putative CBS domain-containing protein [Rosa chinensis]	--	--
RchiOBHm_Chr5g0034571	--	--	--	--	--	--	-3.39465	5e-05	0.00322834	stem-specific protein TSJT1-like	stem-specific protein TSJT1-like [Rosa chinensis]	--	--
RchiOBHm_Chr5g0034761	-1.83459	0.0005	0.0197317	--	--	--	-5.02171	5e-05	0.00322834	NAC domain-containing protein 72	NAC domain-containing protein 72 [Rosa chinensis]	F:GO:0003677	--
RchiOBHm_Chr5g0036031	--	--	--	--	--	--	-1.82973	0.0003	0.0134078	myosin-2	putative myosin ATPase [Rosa chinensis]	F:GO:0005524; C:GO:0016459; F:GO:0003774	--
RchiOBHm_Chr5g0036101	-3.44092	5e-05	0.00322834	-3.06588	5e-05	0.00322834	--	--	--	dynein light chain LC6, flagellar outer arm-like	dynein light chain LC6, flagellar outer arm-like [Rosa chinensis]	C:GO:0030286; P:GO:0007017	--
RchiOBHm_Chr5g0036301	--	--	--	--	--	--	-2.44331	5e-05	0.00322834	zinc finger protein CONSTANS-LIKE 4-like	zinc finger protein CONSTANS-LIKE 4-like [Rosa chinensis]	F:GO:0008270; C:GO:0005622	--
RchiOBHm_Chr5g0036541	-2.9052	5e-05	0.00322834	--	--	--	-1.79205	0.00035	0.015033	calcium-binding protein PBP1-like	calcium-binding protein PBP1-like [Rosa chinensis]	F:GO:0005509	K10840 map03420 Nucleotide excision repair
RchiOBHm_Chr5g0036931	2.21186	0.0005	0.0197317	3.071	5e-05	0.00322834	2.01134	0.0014	0.0416089	uncharacterized LOC112167409	uncharacterized protein LOC112167409 isoform X1 [Rosa chinensis]	--	--
RchiOBHm_Chr5g0037191	--	--	--	-2.82516	0.00035	0.015033	--	--	--	photosynthetic NDH subunit of lumenal location 3, chloroplastic	photosynthetic NDH subunit of lumenal location 3, chloroplastic [Rosa chinensis]	F:GO:0005509; C:GO:0009523; C:GO:0009654; P:GO:0015979; C:GO:0019898	K08901 map00195 Photosynthesis
RchiOBHm_Chr5g0038461	--	--	--	-3.54689	5e-05	0.00322834	--	--	--	7-deoxyloganetin glucosyltransferase-like	7-deoxyloganetin glucosyltransferase-like [Rosa chinensis]	P:GO:0008152	K21374 map00902 Monoterpenoid biosynthesis
RchiOBHm_Chr5g0038821	--	--	--	-3.0778	0.0001	0.00572684	--	--	--	7-deoxyloganetin glucosyltransferase-like	7-deoxyloganetin glucosyltransferase-like [Rosa chinensis]	P:GO:0008152	K21374 map00902 Monoterpenoid biosynthesis
RchiOBHm_Chr5g0039071	-3.68055	0.0001	0.00572684	-2.83855	5e-05	0.00322834	3.80665	5e-05	0.00322834	fatty acid desaturase 4, chloroplastic	fatty acid desaturase 4, chloroplastic [Rosa chinensis]	--	--
RchiOBHm_Chr5g0040191	--	--	--	1.54686	0.0009	0.0303727	--	--	--	uncharacterized LOC112167297	uncharacterized protein LOC112167297 [Rosa chinensis]	--	--
RchiOBHm_Chr5g0041221	--	--	--	--	--	--	1.92301	5e-05	0.00322834	beta-glucosidase 11-like	beta-glucosidase 11-like [Rosa chinensis]	P:GO:0005975	K01188 map00460 Cyanoamino acid metabolism
RchiOBHm_Chr5g0041801	2.85825	5e-05	0.00322834	3.42949	5e-05	0.00322834	--	--	--	cold and drought-regulated protein CORA-like	cold and drought-regulated protein CORA-like [Rosa chinensis]	--	--
RchiOBHm_Chr5g0043981	-5.57908	5e-05	0.00322834	-6.27405	0.0002	0.00978718	-5.21503	5e-05	0.00322834	cytochrome P450 94C1-like	cytochrome P450 94C1-like [Rosa chinensis]	F:GO:0005506; P:GO:0055114; F:GO:0020037	--
RchiOBHm_Chr5g0044531	--	--	--	--	--	--	3.49932	5e-05	0.00322834	protein BIC2-like	protein BIC2-like [Rosa chinensis]	--	--
RchiOBHm_Chr5g0044721	--	--	--	--	--	--	-1.96929	0.00025	0.0115953	glucan endo-1,3-beta-glucosidase 14	glucan endo-1,3-beta-glucosidase 14 isoform X1 [Rosa chinensis]	P:GO:0005975	--
RchiOBHm_Chr5g0045661	-2.77988	5e-05	0.00322834	-3.30443	5e-05	0.00322834	--	--	--	protein FAF-like, chloroplastic	protein FAF-like, chloroplastic [Rosa chinensis]	--	--
RchiOBHm_Chr5g0047031	--	--	--	-1.74651	0.00035	0.015033	--	--	--	bifunctional nitrilase/nitrile hydratase NIT4A	bifunctional nitrilase/nitrile hydratase NIT4A [Rosa chinensis]	P:GO:0006807	K01501 map00380 Tryptophan metabolism
RchiOBHm_Chr5g0047241	-2.94737	5e-05	0.00322834	--	--	--	-3.01987	5e-05	0.00322834	probable CCR4-associated factor 1 homolog 11	putative poly(A)-specific ribonuclease [Rosa chinensis]	F:GO:0004535; F:GO:0003676; P:GO:0000289	--
RchiOBHm_Chr5g0047271	-2.43977	5e-05	0.00322834	-2.04963	5e-05	0.00322834	--	--	--	uncharacterized LOC112166170	uncharacterized protein LOC112166170 [Rosa chinensis]	--	--
RchiOBHm_Chr5g0048601	--	--	--	--	--	--	1.50208	0.00155	0.0447056	protein FAF-like, chloroplastic	protein FAF-like, chloroplastic [Rosa chinensis]	--	--
RchiOBHm_Chr5g0050371	1.70676	0.00045	0.0182298	--	--	--	--	--	--	dihydropyrimidinase	dihydropyrimidinase [Rosa chinensis]	C:GO:0005737; F:GO:0016787	K01464 map00240 Pyrimidine metabolism
RchiOBHm_Chr5g0050581	--	--	--	-1.92055	0.00055	0.0211442	--	--	--	non-specific phospholipase C2	non-specific phospholipase C2 [Rosa chinensis]	F:GO:0003824; P:GO:0008152	K01114 map00562 Inositol phosphate metabolism
RchiOBHm_Chr5g0051981	-1.91095	5e-05	0.00322834	-1.85845	5e-05	0.00322834	--	--	--	dicarboxylate transporter 1, chloroplastic	dicarboxylate transporter 1, chloroplastic [Rosa chinensis]	P:GO:0006814; P:GO:0055085; C:GO:0016020; F:GO:0005215	--
RchiOBHm_Chr5g0052051	-2.14439	5e-05	0.00322834	-2.68615	5e-05	0.00322834	--	--	--	chaperonin-like RbcX protein 2, chloroplastic	chaperonin-like RbcX protein 2, chloroplastic [Rosa chinensis]	--	--
RchiOBHm_Chr5g0053361	--	--	--	2.59274	5e-05	0.00322834	1.75943	0.0008	0.027924	glucan endo-1,3-beta-glucosidase-like	glucan endo-1,3-beta-glucosidase-like [Rosa chinensis]	P:GO:0005975	--
RchiOBHm_Chr5g0053441	-2.10125	0.0003	0.0134078	-2.61587	0.0004	0.0166112	--	--	--	fasciclin-like arabinogalactan protein 1	putative fasciclin-like arabinogalactan protein [Rosa chinensis]	--	--
RchiOBHm_Chr5g0053731	--	--	--	--	--	--	-2.85361	5e-05	0.00322834	nuclear transcription factor Y subunit B-3-like	nuclear transcription factor Y subunit B-3-like [Rosa chinensis]	C:GO:0005634; F:GO:0046982; F:GO:0043565	--
RchiOBHm_Chr5g0054611	-1.7878	0.00125	0.0385361	-2.70754	5e-05	0.00322834	2.46677	5e-05	0.00322834	MLP-like protein 43	MLP-like protein 43 [Rosa chinensis]	P:GO:0009607; P:GO:0006952	--
RchiOBHm_Chr5g0055091	2.59181	0.00075	0.026584	--	--	--	--	--	--	pleiotropic drug resistance protein 2-like	pleiotropic drug resistance protein 2-like [Rosa chinensis]	F:GO:0016887; F:GO:0005524; C:GO:0016020	--
RchiOBHm_Chr5g0055201	--	--	--	--	--	--	1.52212	0.0011	0.0351307	arogenate dehydratase/prephenate dehydratase 6, chloroplastic-like	arogenate dehydratase/prephenate dehydratase 6, chloroplastic-like [Rosa chinensis]	P:GO:0009094; P:GO:0008152; F:GO:0016597; F:GO:0004664	K05359 map00400 Phenylalanine, tyrosine and tryptophan biosynthesis
RchiOBHm_Chr5g0055441	--	--	--	-1.83976	0.0004	0.0166112	--	--	--	glucomannan 4-beta-mannosyltransferase 2-like	glucomannan 4-beta-mannosyltransferase 2-like [Rosa chinensis]	--	--
RchiOBHm_Chr5g0056701	--	--	--	--	--	--	1.80787	0.00095	0.0315944	superoxide dismutase [Cu-Zn], chloroplastic	LOW QUALITY PROTEIN: superoxide dismutase [Cu-Zn]	P:GO:0006801; F:GO:0046872; P:GO:0055114; F:GO:0004784	K04565 map04146 Peroxisome
RchiOBHm_Chr5g0058841	--	--	--	--	--	--	-2.76105	5e-05	0.00322834	uncharacterized LOC112167936	uncharacterized protein LOC112167936 [Rosa chinensis]	--	--
RchiOBHm_Chr5g0058941	--	--	--	--	--	--	-2.68388	0.00025	0.0115953	cytochrome P450 CYP82D47-like	cytochrome P450 CYP82D47-like [Rosa chinensis]	F:GO:0005506; P:GO:0055114; F:GO:0020037	K00512 map01100 Metabolic pathways
RchiOBHm_Chr5g0059401	-2.34672	0.0004	0.0166112	--	--	--	--	--	--	proline-rich receptor-like protein kinase PERK1	proline-rich receptor-like protein kinase PERK1 [Rosa chinensis]	--	--
RchiOBHm_Chr5g0060081	--	--	--	--	--	--	-3.6544	5e-05	0.00322834	cytochrome P450 CYP82D47-like	cytochrome P450 CYP82D47-like [Rosa chinensis]	F:GO:0005506; P:GO:0055114; F:GO:0020037	K00512 map01100 Metabolic pathways
RchiOBHm_Chr5g0060911	--	--	--	--	--	--	2.42434	0.0002	0.00978718	thiamine thiazole synthase, chloroplastic-like	putative thiazole biosynthetic enzyme Thi4 family, FAD/NAD(P)-binding domain-containing protein [Rosa chinensis]	F:GO:0016491; P:GO:0055114; P:GO:0006950; P:GO:0009228	K03146 map00730 Thiamine metabolism
RchiOBHm_Chr5g0060941	--	--	--	--	--	--	-2.86353	5e-05	0.00322834	LOB domain-containing protein 1-like	LOB domain-containing protein 1-like [Rosa chinensis]	--	--
RchiOBHm_Chr5g0061461	-1.63909	0.0016	0.0457597	--	--	--	--	--	--	L-ascorbate peroxidase, cytosolic	L-ascorbate peroxidase, cytosolic [Rosa chinensis]	F:GO:0004601; P:GO:0006979; P:GO:0055114; F:GO:0020037	K00434 map00053 Ascorbate and aldarate metabolism
RchiOBHm_Chr5g0062381	1.65944	0.0002	0.00978718	--	--	--	--	--	--	3-ketoacyl-CoA synthase 12-like	3-ketoacyl-CoA synthase 12-like [Rosa chinensis]	F:GO:0003824; C:GO:0016020; P:GO:0008152; P:GO:0006633	K15397 map00062 Fatty acid elongation
RchiOBHm_Chr5g0062681	--	--	--	--	--	--	-1.72675	0.00055	0.0211442	glutelin type-D 1-like	glutelin type-D 1-like [Rosa chinensis]	F:GO:0045735	--
RchiOBHm_Chr5g0062711	--	--	--	--	--	--	-2.70909	0.0003	0.0134078	monofunctional riboflavin biosynthesis protein RIBA 3, chloroplastic	monofunctional riboflavin biosynthesis protein RIBA 3, chloroplastic [Rosa chinensis]	P:GO:0009231; F:GO:0003935	K14652 map00740 Riboflavin metabolism
RchiOBHm_Chr5g0062791	-5.52563	5e-05	0.00322834	-3.69619	5e-05	0.00322834	-6.78664	5e-05	0.00322834	probable aquaporin TIP1-2	probable aquaporin TIP1-2 [Rosa chinensis]	C:GO:0016020; P:GO:0006810; F:GO:0005215	--
RchiOBHm_Chr5g0062951	-4.4685	0.0002	0.00978718	--	--	--	--	--	--	zinc finger protein ZAT12-like	zinc finger protein ZAT12-like [Rosa chinensis]	F:GO:0046872	--
RchiOBHm_Chr5g0063481	-1.83378	0.00135	0.04063	--	--	--	--	--	--	histone H3.2	hypothetical protein CARUB_v10021660mg, partial [Capsella rubella]	F:GO:0003677; F:GO:0046982; C:GO:0000786	--
RchiOBHm_Chr5g0064511	--	--	--	--	--	--	1.73202	0.00145	0.0426478	outer envelope pore protein 16, chloroplastic	outer envelope pore protein 16, chloroplastic [Rosa chinensis]	--	--
RchiOBHm_Chr5g0064591	-2.10649	0.00105	0.0339528	--	--	--	--	--	--	glucan endo-1,3-beta-glucosidase-like	glucan endo-1,3-beta-glucosidase-like [Rosa chinensis]	P:GO:0005975	--
RchiOBHm_Chr5g0065341	--	--	--	-1.6279	0.0016	0.0457597	--	--	--	PGR5-like protein 1B, chloroplastic	PGR5-like protein 1B, chloroplastic [Rosa chinensis]	--	--
RchiOBHm_Chr5g0065671	--	--	--	--	--	--	-1.62775	0.0011	0.0351307	scarecrow-like protein 30	scarecrow-like protein 30 [Rosa chinensis]	--	--
RchiOBHm_Chr5g0066071	-1.65512	0.00035	0.015033	--	--	--	--	--	--	E3 ubiquitin-protein ligase RDUF2-like	E3 ubiquitin-protein ligase RDUF2-like [Rosa chinensis]	F:GO:0008270; F:GO:0005515	--
RchiOBHm_Chr5g0066111	--	--	--	--	--	--	2.63765	5e-05	0.00322834	transcription factor PCL1-like	transcription factor PCL1-like [Rosa chinensis]	F:GO:0003677	--
RchiOBHm_Chr5g0066401	-2.61088	5e-05	0.00322834	-1.74087	0.0014	0.0416089	-2.93353	5e-05	0.00322834	probable protein phosphatase 2C 24	probable protein phosphatase 2C 24 [Rosa chinensis]	F:GO:0004722; F:GO:0003824; P:GO:0006470; F:GO:0043169	K14497 map04016 MAPK signaling pathway - plant
RchiOBHm_Chr5g0066921	--	--	--	--	--	--	-2.13166	0.0018	0.0498395	protein THYLAKOID ASSEMBLY 8-like, chloroplastic	protein THYLAKOid ASSEMBLY 8-like, chloroplastic [Rosa chinensis]	--	--
RchiOBHm_Chr5g0066991	--	--	--	--	--	--	-3.13436	5e-05	0.00322834	copper transporter 1-like	copper transporter 1-like [Rosa chinensis]	C:GO:0016021; F:GO:0005375; P:GO:0035434	--
RchiOBHm_Chr5g0067051	-5.10903	5e-05	0.00322834	-5.06492	5e-05	0.00322834	-4.20941	5e-05	0.00322834	tryptophan synthase alpha chain-like	tryptophan synthase alpha chain-like [Rosa chinensis]	F:GO:0004834; F:GO:0003824; P:GO:0008152; P:GO:0006568	K01695 map00260 Glycine, serine and threonine metabolism
RchiOBHm_Chr5g0067411	--	--	--	-2.38547	0.0009	0.0303727	--	--	--	uncharacterized LOC112167771	hypothetical protein RchiOBHm_Chr5g0067411 [Rosa chinensis]	--	--
RchiOBHm_Chr5g0067491	-2.9566	0.00075	0.026584	--	--	--	-2.40618	0.00055	0.0211442	uncharacterized LOC112167803	hypothetical protein RchiOBHm_Chr5g0067491 [Rosa chinensis]	--	--
RchiOBHm_Chr5g0068321	--	--	--	--	--	--	2.80503	5e-05	0.00322834	alpha-glucan phosphorylase, H isozyme	alpha-glucan phosphorylase, H isozyme [Rosa chinensis]	F:GO:0008184; F:GO:0004645; P:GO:0005975; F:GO:0030170	K00688 map00500 Starch and sucrose metabolism
RchiOBHm_Chr5g0068421	--	--	--	-1.56006	0.0012	0.0373427	--	--	--	tropinone reductase homolog At2g29150-like	tropinone reductase homolog At2g29150-like [Rosa chinensis]	F:GO:0016491	K08081 map00960 Tropane, piperidine and pyridine alkaloid biosynthesis
RchiOBHm_Chr5g0068741	-1.60844	0.00085	0.0292322	--	--	--	1.8759	0.00095	0.0315944	uncharacterized LOC112166070	uncharacterized protein LOC112166070 [Rosa chinensis]	--	--
RchiOBHm_Chr5g0069161	-3.20608	5e-05	0.00322834	-3.52834	5e-05	0.00322834	1.91848	0.0001	0.00572684	ammonium transporter 1 member 3-like	ammonium transporter 1 member 3-like [Rosa chinensis]	F:GO:0008519; P:GO:0015696; P:GO:0072488; C:GO:0016020	--
RchiOBHm_Chr5g0069171	--	--	--	--	--	--	-1.74022	0.00035	0.015033	E3 ubiquitin-protein ligase AIRP2-like	E3 ubiquitin-protein ligase AIRP2-like [Rosa chinensis]	F:GO:0008270; F:GO:0005515	--
RchiOBHm_Chr5g0069721	21.3628	0.0012	0.0373427	--	--	--	--	--	--	probable disease resistance protein At4g27220	putative TIR domain, P-loop containing nucleoside triphosphate hydrolase [Rosa chinensis]	F:GO:0005515; P:GO:0007165; F:GO:0043531	K13459 map04626 Plant-pathogen interaction
RchiOBHm_Chr5g0069961	--	--	--	-1.63508	0.00085	0.0292322	--	--	--	omega-3 fatty acid desaturase, endoplasmic reticulum-like	omega-3 fatty acid desaturase, endoplasmic reticulum-like [Rosa chinensis]	P:GO:0006629; P:GO:0055114	--
RchiOBHm_Chr5g0070171	--	--	--	--	--	--	4.19511	0.00095	0.0315944	gibberellin 2-beta-dioxygenase 8-like	putative oxoglutarate/iron-dependent dioxygenase, non-heme dioxygenase domain-containing protein [Rosa chinensis]	F:GO:0016491; P:GO:0055114	--
RchiOBHm_Chr5g0070221	3.65996	5e-05	0.00322834	4.15962	5e-05	0.00322834	--	--	--	asparagine synthetase [glutamine-hydrolyzing]	asparagine synthetase [glutamine-hydrolyzing]	P:GO:0006529; F:GO:0004066	K01953 map00250 Alanine, aspartate and glutamate metabolism
RchiOBHm_Chr5g0070291	--	--	--	--	--	--	-1.83642	0.00065	0.0239894	probable protein phosphatase 2C 25	probable protein phosphatase 2C 25 [Rosa chinensis]	F:GO:0004722; F:GO:0003824; P:GO:0006470; F:GO:0043169	--
RchiOBHm_Chr5g0071321	--	--	--	1.92312	5e-05	0.00322834	--	--	--	zinc finger protein CONSTANS-LIKE 7	zinc finger protein CONSTANS-LIKE 7 [Rosa chinensis]	F:GO:0005515	--
RchiOBHm_Chr5g0071811	--	--	--	--	--	--	-1.81955	0.00015	0.00788832	WRKY transcription factor WRKY24-like	WRKY transcription factor WRKY24-like isoform X2 [Rosa chinensis]	F:GO:0043565	K13423 map04016 MAPK signaling pathway - plant
RchiOBHm_Chr5g0072371	--	--	--	2.14502	5e-05	0.00322834	--	--	--	peroxidase 4-like	peroxidase 4-like [Rosa chinensis]	F:GO:0004601; P:GO:0006979; P:GO:0055114; F:GO:0020037	K00430 map00940 Phenylpropanoid biosynthesis
RchiOBHm_Chr5g0072501	-1.92465	0.0014	0.0416089	--	--	--	--	--	--	uncharacterized LOC112164145	uncharacterized protein LOC112164145 [Rosa chinensis]	C:GO:0005576; P:GO:0009405	--
RchiOBHm_Chr5g0072531	--	--	--	-1.54471	0.0009	0.0303727	-1.61955	0.0009	0.0303727	uncharacterized LOC112165951	uncharacterized protein LOC112165951 [Rosa chinensis]	F:GO:0016491; P:GO:0055114	--
RchiOBHm_Chr5g0072761	--	--	--	--	--	--	-3.60016	5e-05	0.00322834	expansin-A4-like	expansin-A4-like [Rosa chinensis]	P:GO:0009664; C:GO:0005576	--
RchiOBHm_Chr5g0073351	--	--	--	--	--	--	2.11294	0.00025	0.0115953	trans-cinnamate 4-monooxygenase	trans-cinnamate 4-monooxygenase [Rosa chinensis]	F:GO:0005506; P:GO:0055114; F:GO:0020037	K00487 map00130 Ubiquinone and other terpenoid-quinone biosynthesis
RchiOBHm_Chr5g0073531	--	--	--	--	--	--	-2.59768	0.00015	0.00788832	pathogenesis-related genes transcriptional activator PTI6-like	pathogenesis-related genes transcriptional activator PTI6-like [Rosa chinensis]	F:GO:0003677	K13434 map04626 Plant-pathogen interaction
RchiOBHm_Chr5g0073591	--	--	--	--	--	--	-2.33295	5e-05	0.00322834	root phototropism protein 2	root phototropism protein 2 [Rosa chinensis]	F:GO:0005515	--
RchiOBHm_Chr5g0074241	1.56205	0.0013	0.0396058	--	--	--	--	--	--	peroxisome biogenesis protein 5	peroxisome biogenesis protein 5 [Rosa chinensis]	F:GO:0005515	K13342 map04146 Peroxisome
RchiOBHm_Chr5g0075141	2.08846	0.0005	0.0197317	--	--	--	--	--	--	probable galactinol--sucrose galactosyltransferase 1	probable galactinol--sucrose galactosyltransferase 1 [Rosa chinensis]	F:GO:0003824	K06617 map00052 Galactose metabolism
RchiOBHm_Chr5g0075541	-2.44403	5e-05	0.00322834	--	--	--	--	--	--	heat shock protein 90-2	heat shock protein 90-2 [Rosa chinensis]	F:GO:0005524; F:GO:0051082; P:GO:0006457; P:GO:0006950	K04079 map04141 Protein processing in endoplasmic reticulum
RchiOBHm_Chr5g0076421	2.40577	0.0004	0.0166112	--	--	--	--	--	--	isoflavone 3'-hydroxylase-like	isoflavone 3'-hydroxylase-like [Rosa chinensis]	F:GO:0005506; P:GO:0055114; F:GO:0020037	K00512 map01100 Metabolic pathways
RchiOBHm_Chr5g0077361	-2.25712	5e-05	0.00322834	-3.12767	5e-05	0.00322834	--	--	--	uncharacterized LOC112167860	uncharacterized protein LOC112167860 [Rosa chinensis]	--	--
RchiOBHm_Chr5g0081431	-3.51014	5e-05	0.00322834	-2.33989	5e-05	0.00322834	-1.5637	0.0006	0.0226208	uncharacterized LOC112165604	uncharacterized protein LOC112165604 [Rosa chinensis]	--	--
RchiOBHm_Chr5g0082861	--	--	--	--	--	--	3.75112	5e-05	0.00322834	probable polyamine transporter At3g13620	probable polyamine transporter At3g13620 [Rosa chinensis]	C:GO:0016020; F:GO:0015171; P:GO:0003333	--
RchiOBHm_Chr5g0082971	--	--	--	--	--	--	-4.16237	5e-05	0.00322834	F-box/kelch-repeat protein At1g15670-like	F-box/kelch-repeat protein At1g15670-like [Rosa chinensis]	F:GO:0005515	--
RchiOBHm_Chr5g0083181	--	--	--	-1.44446	0.0017	0.0477705	--	--	--	protochlorophyllide-dependent translocon component 52, chloroplastic-like	protochlorophyllide-dependent translocon component 52, chloroplastic-like [Rosa chinensis]	F:GO:0016491; P:GO:0055114; F:GO:0010277	--
RchiOBHm_Chr5g0083861	--	--	--	-1.78056	0.0012	0.0373427	--	--	--	protein MET1, chloroplastic	protein MET1, chloroplastic [Rosa chinensis]	F:GO:0005515	--
RchiOBHm_Chr5g0083951	2.07783	5e-05	0.00322834	2.01642	0.0001	0.00572684	--	--	--	2-oxoisovalerate dehydrogenase subunit beta 1, mitochondrial	2-oxoisovalerate dehydrogenase subunit beta 1, mitochondrial [Rosa chinensis]	F:GO:0003824; P:GO:0008152	K00059 map00061 Fatty acid biosynthesis
RchiOBHm_Chr6g0244181	--	--	--	-2.40618	0.00165	0.0467628	--	--	--	thaumatin-like protein 1	thaumatin-like protein 1 [Rosa chinensis]	--	--
RchiOBHm_Chr6g0245161	--	--	--	-2.69906	0.00055	0.0211442	--	--	--	proline-rich protein 4-like	hypothetical protein RchiOBHm_Chr6g0245161 [Rosa chinensis]	--	--
RchiOBHm_Chr6g0245291	-1.59528	0.001	0.0328082	--	--	--	--	--	--	uncharacterized LOC112170222	uncharacterized protein LOC112170222 [Rosa chinensis]	--	--
RchiOBHm_Chr6g0245891	-2.30484	5e-05	0.00322834	-2.342	5e-05	0.00322834	--	--	--	uncharacterized LOC112172122	uncharacterized protein LOC112172122 [Rosa chinensis]	F:GO:0005509	--
RchiOBHm_Chr6g0246321	-1.74127	0.00165	0.0467628	-1.90625	0.0007	0.0253552	--	--	--	malate dehydrogenase, glyoxysomal	malate dehydrogenase, glyoxysomal [Rosa chinensis]	P:GO:0005975; F:GO:0030060; P:GO:0006108; F:GO:0016615; F:GO:0016491; F:GO:0003824; P:GO:0055114; P:GO:0019752	K00026 map00020 Citrate cycle (TCA cycle)
RchiOBHm_Chr6g0246351	--	--	--	--	--	--	-4.24557	0.0001	0.00572684	receptor-like protein kinase HAIKU2	receptor-like protein kinase HAIKU2 [Rosa chinensis]	F:GO:0005524; F:GO:0004672; P:GO:0006468	--
RchiOBHm_Chr6g0247671	1.76881	0.0005	0.0197317	2.95961	5e-05	0.00322834	--	--	--	pathogenesis-related protein 1-like	pathogenesis-related protein 1-like [Rosa chinensis]	C:GO:0005576	K13449 map04016 MAPK signaling pathway - plant
RchiOBHm_Chr6g0248001	-1.56538	0.00165	0.0467628	--	--	--	--	--	--	uncharacterized LOC112170005	hypothetical protein RchiOBHm_Chr6g0248001 [Rosa chinensis]	--	--
RchiOBHm_Chr6g0248441	-2.48947	5e-05	0.00322834	-3.25763	5e-05	0.00322834	--	--	--	probable zinc metallopeptidase EGY3, chloroplastic	probable zinc metallopeptidase EGY3, chloroplastic isoform X1 [Rosa chinensis]	--	--
RchiOBHm_Chr6g0248481	-1.93628	0.0009	0.0303727	--	--	--	--	--	--	phytosulfokines-like	phytosulfokines-like [Rosa chinensis]	P:GO:0008283; F:GO:0008083; C:GO:0005576	--
RchiOBHm_Chr6g0248941	-2.39028	5e-05	0.00322834	-3.15688	5e-05	0.00322834	--	--	--	serine carboxypeptidase-like 18	serine carboxypeptidase-like 18 [Rosa chinensis]	P:GO:0006508; F:GO:0004185	--
RchiOBHm_Chr6g0249011	--	--	--	-2.29918	0.00015	0.00788832	--	--	--	serine carboxypeptidase-like 18	serine carboxypeptidase-like 18 [Rosa chinensis]	P:GO:0006508; F:GO:0004185	--
RchiOBHm_Chr6g0249631	--	--	--	--	--	--	2.43416	0.0002	0.00978718	probable sucrose-phosphate synthase 4	probable sucrose-phosphate synthase 4 [Rosa chinensis]	F:GO:0046524; F:GO:0016157; P:GO:0005985	K00696 map00500 Starch and sucrose metabolism
RchiOBHm_Chr6g0251271	-2.76344	0.00075	0.026584	--	--	--	--	--	--	uncharacterized LOC112172008	uncharacterized protein LOC112172008 [Rosa chinensis]	--	--
RchiOBHm_Chr6g0251541	-2.34812	5e-05	0.00322834	-4.06738	5e-05	0.00322834	--	--	--	protein STAY-GREEN LIKE, chloroplastic	protein STAY-GREEN LIKE, chloroplastic [Rosa chinensis]	--	K22013 map00860 Porphyrin metabolism
RchiOBHm_Chr6g0251901	--	--	--	--	--	--	1.6746	0.0006	0.0226208	ubiquitin-conjugating enzyme E2 28-like	ubiquitin-conjugating enzyme E2 28-like [Rosa chinensis]	--	--
RchiOBHm_Chr6g0252261	-1.73763	0.00015	0.00788832	--	--	--	-1.64798	0.0006	0.0226208	protein EARLY-RESPONSIVE TO DEHYDRATION 7, chloroplastic-like	protein EARLY-RESPONSIVE TO DEHYDRATION 7, chloroplastic-like [Rosa chinensis]	--	K19366 map04144 Endocytosis
RchiOBHm_Chr6g0252301	--	--	--	-2.21367	0.0003	0.0134078	--	--	--	UPF0481 protein At3g47200-like	UPF0481 protein At3g47200-like [Rosa chinensis]	--	--
RchiOBHm_Chr6g0252491	--	--	--	-2.47853	0.00015	0.00788832	--	--	--	serine carboxypeptidase-like 2	serine carboxypeptidase-like 2 isoform X1 [Rosa chinensis]	P:GO:0006508; F:GO:0004185	--
RchiOBHm_Chr6g0252561	--	--	--	2.07408	0.0009	0.0303727	--	--	--	uncharacterized LOC112173528	uncharacterized protein LOC112173528 [Rosa chinensis]	--	--
RchiOBHm_Chr6g0253001	-2.51858	0.0011	0.0351307	--	--	--	-2.16976	0.00125	0.0385361	PXMP2/4 family protein 4-like	hypothetical protein RchiOBHm_Chr6g0253001 [Rosa chinensis]	C:GO:0016021	K13348 map04146 Peroxisome
RchiOBHm_Chr6g0253491	-2.69821	0.00025	0.0115953	--	--	--	--	--	--	zinc finger protein ZAT10-like	zinc finger protein ZAT10-like [Rosa chinensis]	F:GO:0046872	--
RchiOBHm_Chr6g0254331	8.69428	0.00125	0.0385361	7.50868	0.001	0.0328082	--	--	--	uncharacterized LOC112168981	uncharacterized protein LOC112168981 isoform X2 [Rosa chinensis]	F:GO:0005515	--
RchiOBHm_Chr6g0254401	--	--	--	--	--	--	-2.43925	5e-05	0.00322834	probable indole-3-acetic acid-amido synthetase GH3.1	probable indole-3-acetic acid-amido synthetase GH3.1 [Rosa chinensis]	--	K14487 map04075 Plant hormone signal transduction
RchiOBHm_Chr6g0254941	--	--	--	--	--	--	1.61079	0.00025	0.0115953	putative UDP-glucose glucosyltransferase	putative UDP-glucose glucosyltransferase [Rosa chinensis]	P:GO:0008152	--
RchiOBHm_Chr6g0255151	--	--	--	1.86866	0.0014	0.0416089	--	--	--	endochitinase EP3-like	endochitinase EP3-like [Rosa chinensis]	F:GO:0004568; P:GO:0016998; P:GO:0005975; P:GO:0006032	K01183 map00520 Amino sugar and nucleotide sugar metabolism
RchiOBHm_Chr6g0255341	--	--	--	--	--	--	-2.66025	0.0006	0.0226208	transcription factor MYB44-like	putative transcription factor MYB-HB-like family [Rosa chinensis]	F:GO:0003677	--
RchiOBHm_Chr6g0257401	--	--	--	-1.60503	0.00105	0.0339528	--	--	--	abscisic acid 8'-hydroxylase 4	abscisic acid 8'-hydroxylase 4 [Rosa chinensis]	F:GO:0005506; P:GO:0055114; F:GO:0020037	K09843 map00906 Carotenoid biosynthesis
RchiOBHm_Chr6g0257431	--	--	--	--	--	--	2.52898	0.0015	0.0436334	ferredoxin--nitrite reductase, chloroplastic	ferredoxin--nitrite reductase, chloroplastic [Rosa chinensis]	F:GO:0016491; P:GO:0055114; F:GO:0051536; F:GO:0020037	K00366 map00910 Nitrogen metabolism
RchiOBHm_Chr6g0257831	-2.16926	5e-05	0.00322834	-1.78588	0.0002	0.00978718	--	--	--	U-box domain-containing protein 26-like	U-box domain-containing protein 26-like [Rosa chinensis]	F:GO:0004842; F:GO:0005488; P:GO:0016567	--
RchiOBHm_Chr6g0258321	-1.61814	0.00085	0.0292322	-1.70138	0.0007	0.0253552	--	--	--	probable carboxylesterase 12	probable carboxylesterase 12 [Rosa chinensis]	P:GO:0008152; F:GO:0016787	--
RchiOBHm_Chr6g0258711	-2.03055	5e-05	0.00322834	--	--	--	-2.09761	0.00015	0.00788832	probable membrane-associated kinase regulator 3	probable membrane-associated kinase regulator 3 [Rosa chinensis]	--	--
RchiOBHm_Chr6g0259191	--	--	--	--	--	--	-2.16068	5e-05	0.00322834	transcription factor HHO5-like	transcription factor HHO5-like [Rosa chinensis]	F:GO:0003677	--
RchiOBHm_Chr6g0259401	--	--	--	--	--	--	-3.69694	0.0002	0.00978718	uncharacterized LOC112172658	uncharacterized protein LOC112172658 isoform X1 [Rosa chinensis]	--	--
RchiOBHm_Chr6g0259531	--	--	--	2.38072	0.00155	0.0447056	--	--	--	probable 2-oxoglutarate-dependent dioxygenase At5g05600	probable 2-oxoglutarate-dependent dioxygenase At5g05600 [Rosa chinensis]	F:GO:0016491; P:GO:0055114	--
RchiOBHm_Chr6g0259611	1.82387	0.00115	0.0362702	2.28967	0.0002	0.00978718	--	--	--	CCG-binding protein 1	CCG-binding protein 1 [Rosa chinensis]	--	--
RchiOBHm_Chr6g0260831	--	--	--	--	--	--	2.58995	5e-05	0.00322834	uncharacterized LOC112169844	uncharacterized protein LOC112169844 [Rosa chinensis]	--	--
RchiOBHm_Chr6g0261051	--	--	--	--	--	--	-3.97354	0.0001	0.00572684	cold-regulated 413 plasma membrane protein 1-like	cold-regulated 413 plasma membrane protein 1-like [Rosa chinensis]	C:GO:0016021	--
RchiOBHm_Chr6g0262171	--	--	--	--	--	--	4.1309	5e-05	0.00322834	hemoglobin-2	hemoglobin-2 [Rosa chinensis]	F:GO:0019825; F:GO:0020037	--
RchiOBHm_Chr6g0262281	--	--	--	-2.05303	5e-05	0.00322834	--	--	--	uncharacterized LOC112172125	uncharacterized protein LOC112172125 [Rosa chinensis]	--	--
RchiOBHm_Chr6g0262291	--	--	--	-1.521	0.00135	0.04063	--	--	--	protein TIC 62, chloroplastic	protein TIC 62, chloroplastic [Rosa chinensis]	--	--
RchiOBHm_Chr6g0262391	--	--	--	-1.78068	0.0014	0.0416089	--	--	--	4-hydroxy-3-methylbut-2-enyl diphosphate reductase, chloroplastic	4-hydroxy-3-methylbut-2-enyl diphosphate reductase, chloroplastic [Rosa chinensis]	P:GO:0050992; F:GO:0046872; F:GO:0051745	K03527 map00900 Terpenoid backbone biosynthesis
RchiOBHm_Chr6g0262541	-2.69652	0.0006	0.0226208	-2.98048	0.0005	0.0197317	--	--	--	transcription termination factor MTEF1, chloroplastic	putative transcription regulator mTERF family [Rosa chinensis]	F:GO:0003690	--
RchiOBHm_Chr6g0263721	-3.53982	5e-05	0.00322834	-3.82822	5e-05	0.00322834	2.49371	5e-05	0.00322834	dehydrodolichyl diphosphate synthase complex subunit NUS1	dehydrodolichyl diphosphate synthase complex subunit NUS1 [Rosa chinensis]	--	K11778 map00900 Terpenoid backbone biosynthesis
RchiOBHm_Chr6g0263881	-3.18038	5e-05	0.00322834	--	--	--	--	--	--	organ-specific protein P4	organ-specific protein P4 [Rosa chinensis]	--	--
RchiOBHm_Chr6g0265031	--	--	--	--	--	--	3.5309	5e-05	0.00322834	uncharacterized LOC112170299	uncharacterized protein LOC112170299 isoform X1 [Rosa chinensis]	--	--
RchiOBHm_Chr6g0265271	--	--	--	--	--	--	2.96205	5e-05	0.00322834	glucose-1-phosphate adenylyltransferase large subunit 1-like	glucose-1-phosphate adenylyltransferase large subunit 1-like [Rosa chinensis]	F:GO:0016779; P:GO:0005978; P:GO:0009058; F:GO:0008878	K00975 map00500 Starch and sucrose metabolism
RchiOBHm_Chr6g0266031	--	--	--	--	--	--	-1.63769	0.001	0.0328082	uncharacterized LOC112169991	uncharacterized protein LOC112169991 [Rosa chinensis]	--	--
RchiOBHm_Chr6g0267191	--	--	--	-2.10316	0.0013	0.0396058	--	--	--	protein DETOXIFICATION 46, chloroplastic-like	protein DETOXIFICATION 46, chloroplastic-like [Rosa chinensis]	P:GO:0006855; P:GO:0055085; F:GO:0015297; C:GO:0016020; F:GO:0015238	--
RchiOBHm_Chr6g0269391	--	--	--	--	--	--	-1.65148	0.0011	0.0351307	trithorax group protein osa	trithorax group protein osa [Rosa chinensis]	F:GO:0005515	--
RchiOBHm_Chr6g0270131	--	--	--	--	--	--	3.09742	0.0012	0.0373427	alpha-glucan water dikinase, chloroplastic-like	putative phosphotransferase with paired acceptor [Rosa chinensis]	F:GO:0005524; F:GO:0003824; P:GO:0016310; F:GO:0016301	--
RchiOBHm_Chr6g0270211	1.97029	0.0002	0.00978718	--	--	--	-2.31445	5e-05	0.00322834	gamma-glutamyl peptidase 5-like	gamma-glutamyl peptidase 5-like [Rosa chinensis]	--	--
RchiOBHm_Chr6g0272941	-2.80654	0.0007	0.0253552	--	--	--	--	--	--	ATP synthase subunit delta, chloroplastic	ATP synthase subunit delta, chloroplastic [Rosa chinensis]	C:GO:0016020; P:GO:0015986	K02113 map00190 Oxidative phosphorylation
RchiOBHm_Chr6g0273731	--	--	--	-3.05495	5e-05	0.00322834	--	--	--	laccase-14-like	putative laccase [Rosa chinensis]	P:GO:0046274; F:GO:0005507; F:GO:0016491; C:GO:0048046; P:GO:0055114; F:GO:0052716	--
RchiOBHm_Chr6g0273761	--	--	--	-2.77412	0.0002	0.00978718	-2.18845	0.0004	0.0166112	laccase-14-like	putative laccase [Rosa chinensis]	P:GO:0046274; F:GO:0005507; F:GO:0016491; C:GO:0048046; P:GO:0055114; F:GO:0052716	--
RchiOBHm_Chr6g0274121	--	--	--	-3.0366	0.0008	0.027924	--	--	--	putative laccase-9	putative laccase-9 [Rosa chinensis]	P:GO:0046274; F:GO:0005507; F:GO:0016491; C:GO:0048046; P:GO:0055114; F:GO:0052716	--
RchiOBHm_Chr6g0274251	-2.18607	5e-05	0.00322834	--	--	--	--	--	--	protein GIGANTEA	protein GIGANTEA isoform X1 [Rosa chinensis]	--	K12124 map04712 Circadian rhythm - plant
RchiOBHm_Chr6g0274591	-3.13832	5e-05	0.00322834	--	--	--	-4.05904	5e-05	0.00322834	ethylene-responsive transcription factor ABR1-like	ethylene-responsive transcription factor ABR1-like [Rosa chinensis]	F:GO:0003677	--
RchiOBHm_Chr6g0274691	--	--	--	--	--	--	-2.60188	5e-05	0.00322834	polypyrimidine tract-binding protein homolog 3	polypyrimidine tract-binding protein homolog 3 [Rosa chinensis]	F:GO:0003676; F:GO:0000166; C:GO:0005634; F:GO:0003723; P:GO:0006397	--
RchiOBHm_Chr6g0274971	--	--	--	--	--	--	-2.99043	5e-05	0.00322834	uncharacterized LOC112172121	hypothetical protein RchiOBHm_Chr6g0274971 [Rosa chinensis]	--	--
RchiOBHm_Chr6g0275641	--	--	--	-1.77664	0.00075	0.026584	--	--	--	fructose-1,6-bisphosphatase, cytosolic	fructose-1,6-bisphosphatase, cytosolic [Rosa chinensis]	P:GO:0005975; F:GO:0016791; F:GO:0042578	K03841 map00010 Glycolysis / Gluconeogenesis
RchiOBHm_Chr6g0276311	-2.19442	5e-05	0.00322834	-1.81349	0.0002	0.00978718	-1.89565	5e-05	0.00322834	serine decarboxylase	serine decarboxylase [Rosa chinensis]	F:GO:0030170; F:GO:0003824; P:GO:0019752; F:GO:0016831	K01590 map00340 Histidine metabolism
RchiOBHm_Chr6g0276331	3.30726	5e-05	0.00322834	4.43654	5e-05	0.00322834	--	--	--	carbonic anhydrase 2-like	carbonic anhydrase 2-like isoform X1 [Rosa chinensis]	F:GO:0008270; F:GO:0004089; P:GO:0015976	K01673 map00910 Nitrogen metabolism
RchiOBHm_Chr6g0276541	-1.70627	0.0017	0.0477705	--	--	--	-2.86009	5e-05	0.00322834	U-box domain-containing protein 28-like	U-box domain-containing protein 28-like [Rosa chinensis]	F:GO:0004842; F:GO:0005488; P:GO:0016567	--
RchiOBHm_Chr6g0277361	-2.10905	0.0016	0.0457597	-2.12404	0.0018	0.0498395	--	--	--	psbP domain-containing protein 4, chloroplastic	psbP domain-containing protein 4, chloroplastic isoform X1 [Rosa chinensis]	F:GO:0005509; C:GO:0009523; C:GO:0009654; P:GO:0015979; C:GO:0019898	--
RchiOBHm_Chr6g0277471	-2.56444	0.00045	0.0182298	-2.71614	0.00025	0.0115953	--	--	--	thioredoxin M-type, chloroplastic-like	putative protein-disulfide reductase [Rosa chinensis]	F:GO:0015035; P:GO:0006662; P:GO:0045454	--
RchiOBHm_Chr6g0277781	--	--	--	--	--	--	1.79438	0.00115	0.0362702	siroheme synthase-like	uncharacterized protein LOC112172812 [Rosa chinensis]	P:GO:0006779; P:GO:0008152; F:GO:0008168; P:GO:0055114	K02303 map00860 Porphyrin metabolism
RchiOBHm_Chr6g0278401	--	--	--	-2.011	0.00035	0.015033	--	--	--	aquaporin PIP2-7	aquaporin PIP2-7 [Rosa chinensis]	C:GO:0016020; P:GO:0006810; F:GO:0005215	--
RchiOBHm_Chr6g0278971	--	--	--	-2.49739	0.00095	0.0315944	--	--	--	serine/threonine protein phosphatase 2A 57 kDa regulatory subunit B' beta isoform-like	putative protein phosphatase 2A, regulatory B subunit, B56 [Rosa chinensis]	P:GO:0007165; C:GO:0000159; F:GO:0005488; F:GO:0019888	K11584 map03015 mRNA surveillance pathway
RchiOBHm_Chr6g0279001	--	--	--	--	--	--	-3.73217	0.00015	0.00788832	pentatricopeptide repeat-containing protein At4g35130, chloroplastic	pentatricopeptide repeat-containing protein At4g35130, chloroplastic [Rosa chinensis]	F:GO:0005515	--
RchiOBHm_Chr6g0279251	--	--	--	-4.7434	0.0018	0.0498395	--	--	--	protein PELPK1	protein PELPK1 [Rosa chinensis]	--	--
RchiOBHm_Chr6g0279541	--	--	--	--	--	--	-2.21013	0.00035	0.015033	signal recognition particle 43 kDa protein, chloroplastic	signal recognition particle 43 kDa protein, chloroplastic [Rosa chinensis]	F:GO:0005515	--
RchiOBHm_Chr6g0279731	--	--	--	--	--	--	-2.34347	5e-05	0.00322834	lysine histidine transporter-like 8	lysine histidine transporter-like 8 [Rosa chinensis]	--	--
RchiOBHm_Chr6g0279841	--	--	--	3.70228	5e-05	0.00322834	--	--	--	endochitinase 2-like	endochitinase 2-like [Rosa chinensis]	F:GO:0004568; P:GO:0016998; P:GO:0005975; F:GO:0008061; P:GO:0006032	K20547 map00520 Amino sugar and nucleotide sugar metabolism
RchiOBHm_Chr6g0280171	-1.56174	0.001	0.0328082	--	--	--	--	--	--	lysM domain-containing GPI-anchored protein 2	lysM domain-containing GPI-anchored protein 2 [Rosa chinensis]	--	--
RchiOBHm_Chr6g0280861	--	--	--	--	--	--	2.78184	5e-05	0.00322834	protein EXORDIUM-like 5	protein EXORDIUM-like 5 [Rosa chinensis]	--	--
RchiOBHm_Chr6g0280981	--	--	--	--	--	--	1.81216	0.0003	0.0134078	monosaccharide-sensing protein 2-like	monosaccharide-sensing protein 2-like [Rosa chinensis]	F:GO:0022891; P:GO:0055085; F:GO:0022857; C:GO:0016020; C:GO:0016021; F:GO:0005215	--
RchiOBHm_Chr6g0281001	--	--	--	--	--	--	1.67186	0.0017	0.0477705	mitochondrial phosphate carrier protein 1, mitochondrial	mitochondrial phosphate carrier protein 1, mitochondrial [Rosa chinensis]	--	--
RchiOBHm_Chr6g0281051	--	--	--	-2.10985	0.00025	0.0115953	--	--	--	uncharacterized LOC112174706	uncharacterized protein LOC112174706 [Rosa chinensis]	--	--
RchiOBHm_Chr6g0281591	--	--	--	--	--	--	#NAME?	5e-05	0.00322834	probably inactive leucine-rich repeat receptor-like protein kinase At5g48380	putative non-specific serine/threonine protein kinase [Rosa chinensis]	F:GO:0005515	--
RchiOBHm_Chr6g0281991	--	--	--	--	--	--	1.70497	0.00035	0.015033	formin-like protein 1	formin-like protein 1 [Rosa chinensis]	--	--
RchiOBHm_Chr6g0282111	--	--	--	-2.38666	0.0016	0.0457597	--	--	--	UDP-glycosyltransferase 74F2-like	UDP-glycosyltransferase 74F2-like [Rosa chinensis]	P:GO:0008152	K11820 map00380 Tryptophan metabolism
RchiOBHm_Chr6g0282231	--	--	--	-2.65852	5e-05	0.00322834	--	--	--	uncharacterized hydrolase YNR064C	uncharacterized hydrolase YNR064C isoform X1 [Rosa chinensis]	--	--
RchiOBHm_Chr6g0282841	--	--	--	--	--	--	-1.90274	0.00105	0.0339528	uncharacterized protein At5g48480	uncharacterized protein At5g48480 [Rosa chinensis]	--	--
RchiOBHm_Chr6g0283301	--	--	--	--	--	--	-3.01548	0.0001	0.00572684	rust resistance kinase Lr10-like	putative glycerophosphodiester phosphodiesterase, protein kinase RLK-Pelle-LRK10L-2 family [Rosa chinensis]	F:GO:0005524; F:GO:0004672; P:GO:0006468	--
RchiOBHm_Chr6g0283431	-2.03514	0.00025	0.0115953	-2.02051	0.0001	0.00572684	--	--	--	serine/threonine-protein kinase OXI1-like	serine/threonine-protein kinase OXI1-like [Rosa chinensis]	F:GO:0005524; F:GO:0004672; P:GO:0006468	K20714 map04016 MAPK signaling pathway - plant
RchiOBHm_Chr6g0283591	--	--	--	--	--	--	-1.77517	0.0012	0.0373427	UV-B-induced protein At3g17800, chloroplastic-like	hypothetical protein RchiOBHm_Chr6g0283591 [Rosa chinensis]	--	--
RchiOBHm_Chr6g0283821	-5.23834	5e-05	0.00322834	--	--	--	-3.8709	5e-05	0.00322834	cytochrome P450 82G1-like	putative cytochrome P450 [Rosa chinensis]	F:GO:0005506; P:GO:0055114; F:GO:0020037	K17961 map00904 Diterpenoid biosynthesis
RchiOBHm_Chr6g0283921	--	--	--	-3.02971	5e-05	0.00322834	--	--	--	ninja-family protein AFP4	ninja-family protein AFP4 [Rosa chinensis]	--	--
RchiOBHm_Chr6g0284511	--	--	--	--	--	--	-2.14308	5e-05	0.00322834	small ubiquitin-related modifier 1-like	small ubiquitin-related modifier 1-like [Rosa chinensis]	F:GO:0005515	K12160 map03013 Nucleocytoplasmic transport
RchiOBHm_Chr6g0284551	--	--	--	--	--	--	-2.52338	5e-05	0.00322834	purple acid phosphatase 15-like	purple acid phosphatase 15-like [Rosa chinensis]	F:GO:0046872; F:GO:0003993; F:GO:0016787	--
RchiOBHm_Chr6g0284641	--	--	--	--	--	--	-1.95259	0.0002	0.00978718	TMV resistance protein N-like	TMV resistance protein N-like [Rosa chinensis]	F:GO:0005515; P:GO:0007165; F:GO:0043531	--
RchiOBHm_Chr6g0284951	-1.89799	0.0004	0.0166112	--	--	--	--	--	--	desumoylating isopeptidase 1	desumoylating isopeptidase 1 [Rosa chinensis]	--	--
RchiOBHm_Chr6g0285061	--	--	--	--	--	--	1.47496	0.0014	0.0416089	uncharacterized protein At4g13200, chloroplastic	uncharacterized protein At4g13200, chloroplastic [Rosa chinensis]	--	--
RchiOBHm_Chr6g0285301	-2.69624	0.00165	0.0467628	-5.22917	0.0018	0.0498395	-2.24077	0.00115	0.0362702	probable pectate lyase 20	probable pectate lyase 20 [Rosa chinensis]	--	K01728 map00040 Pentose and glucuronate interconversions
RchiOBHm_Chr6g0285341	-1.82922	0.0007	0.0253552	-1.68271	0.00115	0.0362702	--	--	--	uncharacterized LOC112173537	uncharacterized protein LOC112173537 [Rosa chinensis]	--	--
RchiOBHm_Chr6g0285501	--	--	--	1.50332	0.0009	0.0303727	--	--	--	chaperonin CPN60-1, mitochondrial	chaperonin CPN60-1, mitochondrial [Rosa chinensis]	F:GO:0005524; C:GO:0005737; P:GO:0042026; P:GO:0006457	K04077 map03018 RNA degradation
RchiOBHm_Chr6g0285991	-2.55708	5e-05	0.00322834	--	--	--	-2.69075	5e-05	0.00322834	uncharacterized LOC112172824	uncharacterized protein LOC112172824 [Rosa chinensis]	--	--
RchiOBHm_Chr6g0286561	-2.4235	0.0001	0.00572684	-2.36739	0.0001	0.00572684	--	--	--	photosystem II reaction center PSB28 protein, chloroplastic	putative photosystem II Psb28, class 1 [Rosa chinensis]	C:GO:0016020; C:GO:0009523; C:GO:0009654; P:GO:0015979	K08903 map00195 Photosynthesis
RchiOBHm_Chr6g0287501	--	--	--	-1.77538	0.00055	0.0211442	--	--	--	glutathione gamma-glutamylcysteinyltransferase 3-like	glutathione gamma-glutamylcysteinyltransferase 3-like isoform X2 [Rosa chinensis]	P:GO:0046938; F:GO:0016756; F:GO:0046872; P:GO:0010038	--
RchiOBHm_Chr6g0288231	--	--	--	-1.29801	0.0116	0.0179504	-4.74771	5e-05	0.00322834	ethylene-responsive transcription factor 1B-like	ethylene-responsive transcription factor 1B-like [Rosa chinensis]	F:GO:0003677	K14516 map04016 MAPK signaling pathway - plant
RchiOBHm_Chr6g0288311	--	--	--	--	--	--	-2.32123	5e-05	0.00322834	hyoscyamine 6-dioxygenase-like	hyoscyamine 6-dioxygenase-like [Rosa chinensis]	F:GO:0016491; P:GO:0055114	--
RchiOBHm_Chr6g0288661	--	--	--	1.70755	0.0001	0.00572684	-1.81043	0.0003	0.0134078	1-aminocyclopropane-1-carboxylate oxidase homolog 4-like	1-aminocyclopropane-1-carboxylate oxidase homolog 4-like [Rosa chinensis]	F:GO:0016491; P:GO:0055114	--
RchiOBHm_Chr6g0289241	--	--	--	--	--	--	2.03441	0.0001	0.00572684	histone H1-like	histone H1-like [Rosa chinensis]	F:GO:0003677; C:GO:0005634; C:GO:0000786; P:GO:0006334	--
RchiOBHm_Chr6g0289581	-2.18274	0.00135	0.04063	-2.61979	0.00025	0.0115953	--	--	--	auxin-induced protein 22D-like	auxin-induced protein 22D-like [Rosa chinensis]	C:GO:0005634; F:GO:0005515	K14484 map04075 Plant hormone signal transduction
RchiOBHm_Chr6g0289711	-2.46188	0.00015	0.00788832	-3.33676	0.00015	0.00788832	--	--	--	beta-carotene isomerase D27, chloroplastic	beta-carotene isomerase D27, chloroplastic [Rosa chinensis]	--	K17911 map00906 Carotenoid biosynthesis
RchiOBHm_Chr6g0290321	--	--	--	--	--	--	-1.69101	0.00035	0.015033	protein NETWORKED 1D	protein NETWORKED 1D [Rosa chinensis]	F:GO:0003779	--
RchiOBHm_Chr6g0290641	2.44886	5e-05	0.00322834	2.03188	0.00025	0.0115953	--	--	--	protein MARD1-like	protein MARD1-like [Rosa chinensis]	--	--
RchiOBHm_Chr6g0291561	--	--	--	--	--	--	-2.71995	5e-05	0.00322834	EID1-like F-box protein 3	Eid1-like F-box protein 3 [Rosa chinensis]	--	--
RchiOBHm_Chr6g0292071	3.58469	0.00025	0.0115953	3.19179	0.00075	0.026584	--	--	--	sugar transporter ERD6-like 7	putative major facilitator, sugar transporter, major facilitator superfamily [Rosa chinensis]	F:GO:0022891; P:GO:0055085; F:GO:0022857; C:GO:0016020; C:GO:0016021; F:GO:0005215	--
RchiOBHm_Chr6g0292211	--	--	--	--	--	--	1.60098	0.001	0.0328082	probable LRR receptor-like serine/threonine-protein kinase At1g34110	probable LRR receptor-like serine/threonine-protein kinase At1g34110 [Rosa chinensis]	F:GO:0005515	--
RchiOBHm_Chr6g0293571	--	--	--	--	--	--	-2.58841	0.00045	0.0182298	epoxide hydrolase A-like	uncharacterized protein LOC112172443 [Rosa chinensis]	F:GO:0003824	--
RchiOBHm_Chr6g0293581	-2.61587	5e-05	0.00322834	--	--	--	-2.88941	5e-05	0.00322834	translocator protein homolog	translocator protein homolog [Rosa chinensis]	C:GO:0016021	--
RchiOBHm_Chr6g0293681	--	--	--	--	--	--	-1.62148	0.00155	0.0447056	stress-related protein	stress-related protein [Rosa chinensis]	--	--
RchiOBHm_Chr6g0293951	--	--	--	--	--	--	1.574	0.00135	0.04063	DExH-box ATP-dependent RNA helicase DExH8	DExH-box ATP-dependent RNA helicase DExH8 [Rosa chinensis]	F:GO:0003676; F:GO:0005524; F:GO:0046872	--
RchiOBHm_Chr6g0294021	2.5379	5e-05	0.00322834	2.84621	5e-05	0.00322834	--	--	--	caffeoylshikimate esterase-like	caffeoylshikimate esterase-like [Rosa chinensis]	--	K01054 map00561 Glycerolipid metabolism
RchiOBHm_Chr6g0294221	--	--	--	--	--	--	2.06082	0.0014	0.0416089	uncharacterized protein At5g01610-like	uncharacterized protein At5g01610-like [Rosa chinensis]	--	--
RchiOBHm_Chr6g0294351	--	--	--	-4.17662	0.00025	0.0115953	--	--	--	endoglucanase 17	endoglucanase 17 [Rosa chinensis]	P:GO:0005975; F:GO:0003824	--
RchiOBHm_Chr6g0294361	2.31504	0.0004	0.0166112	2.28303	0.0004	0.0166112	--	--	--	sucrose synthase 2	sucrose synthase 2 [Rosa chinensis]	F:GO:0016157; P:GO:0005985	K00695 map00500 Starch and sucrose metabolism
RchiOBHm_Chr6g0294941	--	--	--	--	--	--	2.94256	5e-05	0.00322834	O-fucosyltransferase 10	O-fucosyltransferase 10 [Rosa chinensis]	--	--
RchiOBHm_Chr6g0295081	--	--	--	--	--	--	-4.99198	5e-05	0.00322834	glycine-rich protein 2-like	glycine-rich protein 2-like [Rosa chinensis]	F:GO:0003676; F:GO:0003677; F:GO:0008270	--
RchiOBHm_Chr6g0295151	--	--	--	--	--	--	1.97434	0.00015	0.00788832	protein DETOXIFICATION 41-like	protein DETOXIFICATION 41-like [Rosa chinensis]	P:GO:0006855; P:GO:0055085; F:GO:0015297; C:GO:0016020; F:GO:0015238	--
RchiOBHm_Chr6g0295441	--	--	--	1.48707	0.0015	0.0436334	--	--	--	junctophilin-3-like	junctophilin-3-like [Rosa chinensis]	--	--
RchiOBHm_Chr6g0295531	2.48334	5e-05	0.00322834	2.50827	5e-05	0.00322834	-2.21415	0.0003	0.0134078	WAT1-related protein At4g08290	WAT1-related protein At4g08290 [Rosa chinensis]	C:GO:0016020; C:GO:0016021	--
RchiOBHm_Chr6g0295541	--	--	--	--	--	--	-2.20773	0.0004	0.0166112	WAT1-related protein At4g08300-like	WAT1-related protein At4g08300-like [Rosa chinensis]	C:GO:0016020; C:GO:0016021	--
RchiOBHm_Chr6g0296481	1.61961	0.00055	0.0211442	2.33859	5e-05	0.00322834	--	--	--	amino acid permease 3-like	amino acid permease 3-like [Rosa chinensis]	--	--
RchiOBHm_Chr6g0296571	--	--	--	--	--	--	-2.76382	0.00015	0.00788832	probable receptor-like protein kinase At1g11050	probable receptor-like protein kinase At1g11050 [Rosa chinensis]	F:GO:0005524; F:GO:0004672; P:GO:0006468	--
RchiOBHm_Chr6g0297741	-3.54207	5e-05	0.00322834	-4.02684	5e-05	0.00322834	--	--	--	14 kDa proline-rich protein DC2.15-like	14 kDa proline-rich protein DC2.15-like [Rosa chinensis]	--	--
RchiOBHm_Chr6g0298231	--	--	--	--	--	--	3.1466	5e-05	0.00322834	transcription factor HY5	transcription factor HY5 [Rosa chinensis]	F:GO:0003677; C:GO:0005634; F:GO:0043565	K16241 map04712 Circadian rhythm - plant
RchiOBHm_Chr6g0298401	--	--	--	--	--	--	-2.40302	0.0017	0.0477705	RNA-binding protein FUS	putative Zinc finger, RanBP2-type [Rosa chinensis]	F:GO:0008270	--
RchiOBHm_Chr6g0298561	--	--	--	--	--	--	2.32371	0.00075	0.026584	acyl-protein thioesterase 2-like	acyl-protein thioesterase 2-like [Rosa chinensis]	F:GO:0016787	K06130 map00564 Glycerophospholipid metabolism
RchiOBHm_Chr6g0299211	-3.21397	0.0009	0.0303727	--	--	--	--	--	--	probable monogalactosyldiacylglycerol synthase, chloroplastic	monogalactosyldiacylglycerol synthase, chloroplastic isoform X1 [Rosa chinensis]	P:GO:0009247	K03715 map00561 Glycerolipid metabolism
RchiOBHm_Chr6g0299411	1.75725	0.0002	0.00978718	--	--	--	--	--	--	BTB/POZ domain-containing protein NPY1	BTB/POZ domain-containing protein NPY1 [Rosa chinensis]	F:GO:0005515	--
RchiOBHm_Chr6g0299751	-1.93453	0.0015	0.0436334	--	--	--	--	--	--	uncharacterized LOC112174130	uncharacterized protein LOC112174130 [Rosa chinensis]	--	--
RchiOBHm_Chr6g0300111	1.665	0.00075	0.026584	1.6318	0.00065	0.0239894	--	--	--	cytochrome P450 CYP82D47-like	cytochrome P450 CYP82D47-like [Rosa chinensis]	F:GO:0005506; P:GO:0055114; F:GO:0020037	K07408 map00380 Tryptophan metabolism
RchiOBHm_Chr6g0300161	--	--	--	--	--	--	-3.59866	5e-05	0.00322834	cytochrome P450 CYP82D47-like	cytochrome P450 CYP82D47-like [Rosa chinensis]	F:GO:0005506; P:GO:0055114; F:GO:0020037	K00512 map01100 Metabolic pathways
RchiOBHm_Chr6g0300221	-1.84908	0.0015	0.0436334	--	--	--	--	--	--	allene oxide synthase 1, chloroplastic	allene oxide synthase 1, chloroplastic [Rosa chinensis]	F:GO:0005506; P:GO:0055114; F:GO:0004497; F:GO:0020037	K01723 map00592 alpha-Linolenic acid metabolism
RchiOBHm_Chr6g0300401	-2.25669	0.00085	0.0292322	--	--	--	--	--	--	elongation of fatty acids protein 3-like	elongation of fatty acids protein 3-like [Rosa chinensis]	C:GO:0016021	--
RchiOBHm_Chr6g0300491	--	--	--	-2.16825	0.0003	0.0134078	--	--	--	laccase-14-like	laccase-14-like [Rosa chinensis]	P:GO:0046274; F:GO:0005507; F:GO:0016491; C:GO:0048046; P:GO:0055114; F:GO:0052716	K00423 map00053 Ascorbate and aldarate metabolism
RchiOBHm_Chr6g0300651	--	--	--	--	--	--	-1.52423	0.0011	0.0351307	J domain-containing protein required for chloroplast accumulation response 1	J domain-containing protein required for chloroplast accumulation response 1 [Rosa chinensis]	--	--
RchiOBHm_Chr6g0301261	--	--	--	-1.74129	0.0009	0.0303727	--	--	--	tubby-like F-box protein 5	putative F-box domain-containing protein [Rosa chinensis]	F:GO:0005515	--
RchiOBHm_Chr6g0301271	2.82891	5e-05	0.00322834	3.05507	5e-05	0.00322834	-4.85309	0.00135	0.04063	uncharacterized LOC112174689	uncharacterized protein LOC112174689 [Rosa chinensis]	--	--
RchiOBHm_Chr6g0301421	--	--	--	-2.06874	0.00115	0.0362702	3.00694	5e-05	0.00322834	bifunctional dihydroflavonol 4-reductase/flavanone 4-reductase	--	--	K13082 map00941 Flavonoid biosynthesis
RchiOBHm_Chr6g0302111	--	--	--	-3.61687	0.0005	0.0197317	--	--	--	glycine-rich RNA-binding protein 1-like	hypothetical protein RchiOBHm_Chr6g0302111 [Rosa chinensis]	--	--
RchiOBHm_Chr6g0302601	--	--	--	-1.77863	0.00035	0.015033	--	--	--	ATP sulfurylase 2	ATP sulfurylase 2 [Rosa chinensis]	F:GO:0004781; P:GO:0000103	K13811 map00230 Purine metabolism
RchiOBHm_Chr6g0302641	--	--	--	-1.42033	0.0007	0.0253552	--	--	--	endoglucanase 10-like	endoglucanase 10-like [Rosa chinensis]	P:GO:0005975; F:GO:0003824	--
RchiOBHm_Chr6g0302821	2.6111	5e-05	0.00322834	4.35481	5e-05	0.00322834	2.65604	5e-05	0.00322834	gibberellin-regulated protein 1	gibberellin-regulated protein 1 [Rosa chinensis]	--	--
RchiOBHm_Chr6g0303011	--	--	--	--	--	--	-8.59352	5e-05	0.00322834	chaperone protein dnaJ 11, chloroplastic-like	putative DnaJ domain-containing protein [Rosa chinensis]	--	--
RchiOBHm_Chr6g0303041	--	--	--	-1.60222	0.0016	0.0457597	--	--	--	thaumatin-like protein 1b	thaumatin-like protein 1b [Rosa chinensis]	--	--
RchiOBHm_Chr6g0303071	--	--	--	--	--	--	-1.83496	0.00095	0.0315944	endoplasmin homolog	endoplasmin homolog [Rosa chinensis]	F:GO:0005524; F:GO:0051082; P:GO:0006457; P:GO:0006950	K09487 map04141 Protein processing in endoplasmic reticulum
RchiOBHm_Chr6g0303091	1.75567	0.0007	0.0253552	--	--	--	--	--	--	uncharacterized LOC112172268	uncharacterized protein LOC112172268 [Rosa chinensis]	--	--
RchiOBHm_Chr6g0303181	-2.25076	5e-05	0.00322834	-1.8993	0.0004	0.0166112	--	--	--	uncharacterized LOC112171874	uncharacterized protein LOC112171874 [Rosa chinensis]	--	--
RchiOBHm_Chr6g0303381	--	--	--	--	--	--	-1.64596	0.0007	0.0253552	GDSL esterase/lipase EXL3-like	GDSL esterase/lipase EXL3-like [Rosa chinensis]	P:GO:0006629; F:GO:0016298	--
RchiOBHm_Chr6g0303671	--	--	--	--	--	--	-1.98085	0.00115	0.0362702	uncharacterized protein At1g76070	uncharacterized protein At1g76070 [Rosa chinensis]	--	--
RchiOBHm_Chr6g0303681	--	--	--	-2.06962	0.0001	0.00572684	--	--	--	thioredoxin-like protein CDSP32, chloroplastic	thioredoxin-like protein CDSP32, chloroplastic [Rosa chinensis]	F:GO:0015035; P:GO:0006662; P:GO:0045454	--
RchiOBHm_Chr6g0303771	--	--	--	-2.19284	0.0014	0.0416089	--	--	--	glutathione S-transferase-like	glutathione S-transferase-like [Rosa chinensis]	F:GO:0005515	K00799 map00480 Glutathione metabolism
RchiOBHm_Chr6g0303811	--	--	--	--	--	--	-4.15668	5e-05	0.00322834	ganglioside-induced differentiation-associated protein 2-like	ganglioside-induced differentiation-associated protein 2-like [Rosa chinensis]	--	--
RchiOBHm_Chr6g0303931	--	--	--	-2.24426	5e-05	0.00322834	--	--	--	L-ascorbate oxidase homolog	L-ascorbate oxidase homolog [Rosa chinensis]	F:GO:0005507; F:GO:0016491; P:GO:0055114	--
RchiOBHm_Chr6g0304201	2.29961	0.0007	0.0253552	--	--	--	-2.773	5e-05	0.00322834	uncharacterized LOC112170178	uncharacterized protein LOC112170178 isoform X1 [Rosa chinensis]	--	--
RchiOBHm_Chr6g0304511	--	--	--	--	--	--	-2.21489	0.00095	0.0315944	glutamate receptor 2.8-like	glutamate receptor 2.8-like [Rosa chinensis]	C:GO:0016020; F:GO:0004970	--
RchiOBHm_Chr6g0304731	--	--	--	--	--	--	1.90472	0.0007	0.0253552	uncharacterized LOC112172729	uncharacterized protein LOC112172729 isoform X1 [Rosa chinensis]	--	--
RchiOBHm_Chr6g0305061	--	--	--	--	--	--	-4.48571	5e-05	0.00322834	suppressor protein SRP40-like	suppressor protein SRP40-like [Rosa chinensis]	--	--
RchiOBHm_Chr6g0305191	--	--	--	-2.27316	0.00105	0.0339528	--	--	--	probable xyloglucan glycosyltransferase 5	probable xyloglucan glycosyltransferase 5 [Rosa chinensis]	--	--
RchiOBHm_Chr6g0305781	2.77248	5e-05	0.00322834	2.77546	5e-05	0.00322834	--	--	--	sulfite exporter TauE/SafE family protein 3	sulfite exporter TauE/SafE family protein 3 [Rosa chinensis]	C:GO:0016021	--
RchiOBHm_Chr6g0305821	1.72299	0.0002	0.00978718	1.95987	5e-05	0.00322834	--	--	--	aspartate aminotransferase, cytoplasmic	aspartate aminotransferase, cytoplasmic [Rosa chinensis]	F:GO:0030170; F:GO:0003824; F:GO:0008483; P:GO:0006520; P:GO:0009058	K14454 map00220 Arginine biosynthesis
RchiOBHm_Chr6g0305831	2.66317	0.0004	0.0166112	2.84549	0.0001	0.00572684	--	--	--	aspartate aminotransferase, cytoplasmic-like	aspartate aminotransferase, cytoplasmic-like isoform X2 [Rosa chinensis]	F:GO:0030170; F:GO:0003824; F:GO:0008483; P:GO:0006520; P:GO:0009058	K14454 map00220 Arginine biosynthesis
RchiOBHm_Chr6g0306191	--	--	--	--	--	--	2.13132	0.0002	0.00978718	dehydration-responsive element-binding protein 3-like	dehydration-responsive element-binding protein 3-like [Rosa chinensis]	F:GO:0003677	--
RchiOBHm_Chr6g0306521	--	--	--	--	--	--	2.3524	0.0002	0.00978718	uncharacterized LOC112173434	uncharacterized protein LOC112173434 [Rosa chinensis]	--	--
RchiOBHm_Chr6g0307001	-1.99623	0.0016	0.0457597	-2.62508	0.0008	0.027924	-2.64921	0.00055	0.0211442	transcription factor MYB44-like	transcription factor MYB44-like [Rosa chinensis]	F:GO:0003677	--
RchiOBHm_Chr6g0307041	--	--	--	--	--	--	-1.74201	0.00155	0.0447056	protein MIZU-KUSSEI 1	protein MIZU-KUSSEI 1 [Rosa chinensis]	--	--
RchiOBHm_Chr6g0307061	--	--	--	--	--	--	-2.12962	0.0005	0.0197317	uncharacterized LOC112174614	uncharacterized protein LOC112174614 [Rosa chinensis]	--	--
RchiOBHm_Chr6g0307891	--	--	--	-2.29772	5e-05	0.00322834	--	--	--	photosystem I chlorophyll a/b-binding protein 5, chloroplastic	photosystem I chlorophyll a/b-binding protein 5, chloroplastic [Rosa chinensis]	C:GO:0016020	K08911 map00196 Photosynthesis - antenna proteins
RchiOBHm_Chr6g0307951	--	--	--	--	--	--	2.00757	0.00035	0.015033	abscisic acid 8'-hydroxylase 3-like	abscisic acid 8'-hydroxylase 3-like isoform X1 [Rosa chinensis]	F:GO:0005506; P:GO:0055114; F:GO:0020037	K09843 map00906 Carotenoid biosynthesis
RchiOBHm_Chr6g0308181	--	--	--	--	--	--	1.89437	0.0006	0.0226208	uncharacterized LOC112174879	uncharacterized protein LOC112174879 [Rosa chinensis]	--	--
RchiOBHm_Chr6g0308351	--	--	--	-2.62924	0.0017	0.0477705	--	--	--	WUSCHEL-related homeobox 4	WUSCHEL-related homeobox 4 [Rosa chinensis]	F:GO:0003677	--
RchiOBHm_Chr6g0308771	-2.7112	5e-05	0.00322834	-1.72265	0.00145	0.0426478	--	--	--	uncharacterized LOC112169782	uncharacterized protein LOC112169782 [Rosa chinensis]	0	--
RchiOBHm_Chr6g0308781	--	--	--	-2.95316	5e-05	0.00322834	--	--	--	probable isoaspartyl peptidase/L-asparaginase 2	probable isoaspartyl peptidase/L-asparaginase 2 [Rosa chinensis]	F:GO:0016787	K13051 map00250 Alanine, aspartate and glutamate metabolism
RchiOBHm_Chr6g0308831	--	--	--	--	--	--	1.97047	0.0015	0.0436334	uncharacterized LOC112174449	uncharacterized protein LOC112174449 isoform X1 [Rosa chinensis]	--	--
RchiOBHm_Chr6g0309251	--	--	--	--	--	--	2.16154	5e-05	0.00322834	subtilisin-like protease SBT1.7	putative cucumisin [Rosa chinensis]	P:GO:0006508; F:GO:0004252	--
RchiOBHm_Chr6g0309311	--	--	--	-2.11679	0.00055	0.0211442	--	--	--	uncharacterized protein At2g23090-like	PREDICTED: uncharacterized protein At2g23090-like [Fragaria vesca subsp. vesca]	--	--
RchiOBHm_Chr6g0309391	-1.62254	0.0011	0.0351307	--	--	--	-2.01438	5e-05	0.00322834	zinc finger protein ZAT10-like	zinc finger protein ZAT10-like [Rosa chinensis]	F:GO:0046872	--
RchiOBHm_Chr6g0309701	-3.00685	0.0003	0.0134078	--	--	--	--	--	--	putative methyltransferase DDB_G0268948	putative methyltransferase DDB_G0268948 [Rosa chinensis]	P:GO:0008152; F:GO:0008168	--
RchiOBHm_Chr6g0309871	--	--	--	--	--	--	-4.29958	5e-05	0.00322834	uncharacterized LOC112171818	uncharacterized protein LOC112171818 [Rosa chinensis]	--	--
RchiOBHm_Chr6g0309961	--	--	--	--	--	--	#NAME?	5e-05	0.00322834	basic leucine zipper 4	basic leucine zipper 4 [Rosa chinensis]	F:GO:0043565	--
RchiOBHm_Chr6g0310241	2.81134	5e-05	0.00322834	2.61294	5e-05	0.00322834	--	--	--	branched-chain-amino-acid aminotransferase 2, chloroplastic-like	branched-chain-amino-acid aminotransferase 2, chloroplastic-like isoform X2 [Rosa chinensis]	F:GO:0003824; P:GO:0008152; F:GO:0004084; P:GO:0009081	K00826 map00270 Cysteine and methionine metabolism
RchiOBHm_Chr6g0310331	--	--	--	--	--	--	-5.3749	5e-05	0.00322834	zinc finger CCCH domain-containing protein 20-like	zinc finger CCCH domain-containing protein 20-like [Rosa chinensis]	F:GO:0046872	--
RchiOBHm_Chr6g0310901	-2.402	0.00075	0.026584	-3.59197	5e-05	0.00322834	--	--	--	glycine dehydrogenase (decarboxylating), mitochondrial	glycine dehydrogenase (decarboxylating), mitochondrial [Rosa chinensis]	F:GO:0003824; F:GO:0004375; P:GO:0055114; P:GO:0006546; P:GO:0006544	K00281 map00260 Glycine, serine and threonine metabolism
RchiOBHm_Chr6g0310911	1.8966	0.0016	0.0457597	--	--	--	--	--	--	putative GATA transcription factor 22	putative GATA transcription factor 22 [Rosa chinensis]	F:GO:0008270; F:GO:0043565	--
RchiOBHm_Chr6g0311131	-3.31219	0.0013	0.0396058	--	--	--	2.4806	5e-05	0.00322834	glutaredoxin-C6	glutaredoxin-C6 [Rosa chinensis]	F:GO:0015035; F:GO:0009055; P:GO:0045454	--
RchiOBHm_Chr6g0311181	1.71526	0.00055	0.0211442	--	--	--	--	--	--	IQ domain-containing protein IQM1-like	IQ domain-containing protein IQM1-like [Rosa chinensis]	--	--
RchiOBHm_Chr6g0311321	-1.97125	0.00015	0.00788832	--	--	--	--	--	--	protein ALP1-like	protein ALP1-like [Rosa chinensis]	--	--
RchiOBHm_Chr6g0311451	-3.43205	0.0007	0.0253552	-2.37473	0.0015	0.0436334	--	--	--	17.9 kDa class II heat shock protein-like	17.9 kDa class II heat shock protein-like [Rosa chinensis]	--	K13993 map04141 Protein processing in endoplasmic reticulum
RchiOBHm_Chr6g0311731	--	--	--	-4.00798	0.00025	0.0115953	--	--	--	transcription factor WER-like	transcription factor WER-like [Rosa chinensis]	F:GO:0003677	--
RchiOBHm_Chr6g0311781	--	--	--	--	--	--	1.74231	0.00045	0.0182298	cytokinin dehydrogenase 7	cytokinin dehydrogenase 7 [Rosa chinensis]	P:GO:0009690; F:GO:0016491; F:GO:0050660; F:GO:0003824; P:GO:0055114; F:GO:0019139	K00279 map00908 Zeatin biosynthesis
RchiOBHm_Chr6g0311911	-2.19735	5e-05	0.00322834	--	--	--	--	--	--	ylmG homolog protein 2, chloroplastic	ylmG homolog protein 2, chloroplastic [Rosa chinensis]	C:GO:0016020	--
RchiOBHm_Chr6g0312541	-2.55694	0.0001	0.00572684	--	--	--	--	--	--	acetylglutamate kinase, chloroplastic-like	acetylglutamate kinase, chloroplastic-like [Rosa chinensis]	P:GO:0006526; C:GO:0005737; P:GO:0006561; F:GO:0003991	K00930 map00220 Arginine biosynthesis
RchiOBHm_Chr7g0176971	-2.6995	5e-05	0.00322834	-2.01042	0.0001	0.00572684	-1.83569	0.00035	0.015033	uncharacterized LOC112179168	uncharacterized protein LOC112179168 [Rosa chinensis]	--	--
RchiOBHm_Chr7g0177021	--	--	--	--	--	--	-2.01633	5e-05	0.00322834	GEM-like protein 4	GEM-like protein 4 [Rosa chinensis]	--	--
RchiOBHm_Chr7g0177061	1.52076	0.00105	0.0339528	--	--	--	--	--	--	probable metal-nicotianamine transporter YSL7	probable metal-nicotianamine transporter YSL7 [Rosa chinensis]	P:GO:0055085	--
RchiOBHm_Chr7g0177511	--	--	--	-1.93597	0.0002	0.00978718	--	--	--	protein REVEILLE 7-like	putative transcription factor MYB-HB-like family [Rosa chinensis]	F:GO:0003677	--
RchiOBHm_Chr7g0177751	--	--	--	-3.11185	5e-05	0.00322834	--	--	--	zinc-finger homeodomain protein 10-like	zinc-finger homeodomain protein 10-like [Rosa chinensis]	F:GO:0003677	--
RchiOBHm_Chr7g0177841	--	--	--	--	--	--	3.18794	5e-05	0.00322834	purple acid phosphatase 17-like	putative peroxidase, Acid phosphatase [Rosa chinensis]	F:GO:0003993; F:GO:0016787	K14379 map00740 Riboflavin metabolism
RchiOBHm_Chr7g0177871	-1.74605	0.00105	0.0339528	--	--	--	--	--	--	RNA polymerase II subunit A C-terminal domain phosphatase SSU72	RNA polymerase II subunit A C-terminal domain phosphatase SSU72 [Rosa chinensis]	F:GO:0004721; C:GO:0005634; P:GO:0006397	K15544 map03015 mRNA surveillance pathway
RchiOBHm_Chr7g0177951	--	--	--	-1.69371	0.00145	0.0426478	--	--	--	potassium channel SKOR-like	potassium channel SKOR-like [Rosa chinensis]	P:GO:0006813; F:GO:0005249; F:GO:0005216; P:GO:0006811; F:GO:0005515; P:GO:0055085; C:GO:0016020	--
RchiOBHm_Chr7g0178081	--	--	--	-1.47762	0.00095	0.0315944	--	--	--	probable inactive receptor kinase At1g48480	probable inactive receptor kinase At1g48480 [Rosa chinensis]	F:GO:0005524; F:GO:0004672; P:GO:0006468	--
RchiOBHm_Chr7g0178251	--	--	--	--	--	--	-2.59274	5e-05	0.00322834	aldose 1-epimerase	aldose 1-epimerase [Rosa chinensis]	P:GO:0005975; P:GO:0019318; F:GO:0003824; F:GO:0030246; F:GO:0016853	K01785 map00010 Glycolysis / Gluconeogenesis
RchiOBHm_Chr7g0178471	-1.61711	0.00055	0.0211442	-1.57241	0.0009	0.0303727	-1.58518	0.00145	0.0426478	phosphomethylethanolamine N-methyltransferase-like	phosphomethylethanolamine N-methyltransferase-like [Rosa chinensis]	P:GO:0008152; F:GO:0008168; P:GO:0006656; F:GO:0000234	K05929 map00564 Glycerophospholipid metabolism
RchiOBHm_Chr7g0178651	--	--	--	-1.87544	0.00165	0.0467628	--	--	--	uncharacterized GPI-anchored protein At4g28100	uncharacterized GPI-anchored protein At4g28100 [Rosa chinensis]	--	--
RchiOBHm_Chr7g0179601	-2.37428	5e-05	0.00322834	-3.19843	5e-05	0.00322834	--	--	--	uncharacterized protein At5g50100, chloroplastic	uncharacterized protein At5g50100, chloroplastic [Rosa chinensis]	--	--
RchiOBHm_Chr7g0179751	-1.74358	0.00125	0.0385361	--	--	--	--	--	--	uncharacterized LOC112179022	uncharacterized protein LOC112179022 [Rosa chinensis]	--	--
RchiOBHm_Chr7g0180331	--	--	--	1.98415	0.001	0.0328082	--	--	--	protein NUCLEAR FUSION DEFECTIVE 4-like	protein NUCLEAR FUSION DEFECTIVE 4-like [Rosa chinensis]	--	--
RchiOBHm_Chr7g0180441	--	--	--	1.71975	0.0006	0.0226208	--	--	--	protein NRT1/ PTR FAMILY 2.10-like	protein NRT1/ PTR FAMILY 2.10-like [Rosa chinensis]	C:GO:0016020; P:GO:0006810; F:GO:0005215	--
RchiOBHm_Chr7g0180561	-2.02104	0.0007	0.0253552	--	--	--	--	--	--	transmembrane protein DDB_G0273707/DDB_G0273361	transmembrane protein DDB_G0273707/DDB_G0273361 isoform X1 [Rosa chinensis]	--	--
RchiOBHm_Chr7g0180821	--	--	--	1.79989	0.0016	0.0457597	--	--	--	aldose 1-epimerase	aldose 1-epimerase isoform X1 [Rosa chinensis]	P:GO:0005975; P:GO:0019318; F:GO:0003824; F:GO:0030246; F:GO:0016853	K01785 map00010 Glycolysis / Gluconeogenesis
RchiOBHm_Chr7g0181171	-2.04485	0.00045	0.0182298	-2.61519	5e-05	0.00322834	--	--	--	probable carboxylesterase 18	probable carboxylesterase 18 [Rosa chinensis]	P:GO:0008152; F:GO:0016787	K14493 map04075 Plant hormone signal transduction
RchiOBHm_Chr7g0181391	-3.22048	5e-05	0.00322834	-4.83272	5e-05	0.00322834	-2.31123	0.0001	0.00572684	gibberellin-regulated protein 6	gibberellin-regulated protein 6 [Rosa chinensis]	--	--
RchiOBHm_Chr7g0181561	--	--	--	--	--	--	-1.58369	0.00085	0.0292322	cyclic dof factor 3	cyclic dof factor 3 [Rosa chinensis]	F:GO:0003677	K16222 map04712 Circadian rhythm - plant
RchiOBHm_Chr7g0181691	--	--	--	--	--	--	-4.65941	5e-05	0.00322834	thioredoxin-like 1-2, chloroplastic	thioredoxin-like 1-2, chloroplastic [Rosa chinensis]	P:GO:0045454	--
RchiOBHm_Chr7g0182991	--	--	--	-1.64853	0.00055	0.0211442	--	--	--	PLASMODESMATA CALLOSE-BINDING PROTEIN 3-like	PLASMODESMATA CALLOSE-BINDING PROTEIN 3-like [Rosa chinensis]	--	--
RchiOBHm_Chr7g0183201	-2.367	5e-05	0.00322834	-1.97043	0.0004	0.0166112	--	--	--	uncharacterized LOC112178671	uncharacterized protein LOC112178671 [Rosa chinensis]	--	--
RchiOBHm_Chr7g0183401	-5.03705	0.00035	0.015033	-2.81906	0.0015	0.0436334	--	--	--	D-galacturonate reductase-like	D-galacturonate reductase [Rosa chinensis]	F:GO:0016491; P:GO:0055114	K19642 map00053 Ascorbate and aldarate metabolism
RchiOBHm_Chr7g0184231	--	--	--	--	--	--	2.12268	5e-05	0.00322834	calcium sensing receptor, chloroplastic	calcium sensing receptor, chloroplastic [Rosa chinensis]	--	--
RchiOBHm_Chr7g0184401	--	--	--	-2.22779	0.0012	0.0373427	--	--	--	peptidyl-prolyl cis-trans isomerase CYP26-2, chloroplastic	peptidyl-prolyl cis-trans isomerase CYP26-2, chloroplastic isoform X2 [Rosa chinensis]	F:GO:0003755; P:GO:0000413; P:GO:0006457	--
RchiOBHm_Chr7g0185031	--	--	--	--	--	--	-4.39371	0.0005	0.0197317	cytochrome P450 CYP736A12-like	cytochrome P450 CYP736A12-like [Rosa chinensis]	F:GO:0005506; P:GO:0055114; F:GO:0020037	--
RchiOBHm_Chr7g0185281	--	--	--	--	--	--	-1.601	0.00165	0.0467628	uncharacterized LOC112179035	uncharacterized protein LOC112179035 [Rosa chinensis]	--	--
RchiOBHm_Chr7g0186101	2.14068	5e-05	0.00322834	1.63567	0.0009	0.0303727	2.82147	5e-05	0.00322834	cellulose synthase-like protein G3	cellulose synthase-like protein G3 [Rosa chinensis]	C:GO:0016020; F:GO:0016760; P:GO:0030244	--
RchiOBHm_Chr7g0186801	-1.60225	0.0013	0.0396058	-1.73585	0.0007	0.0253552	--	--	--	uncharacterized LOC112175279	uncharacterized protein LOC112175279 [Rosa chinensis]	--	--
RchiOBHm_Chr7g0186851	--	--	--	--	--	--	1.67295	0.001	0.0328082	metal-nicotianamine transporter YSL1	metal-nicotianamine transporter YSL1 [Rosa chinensis]	P:GO:0055085	--
RchiOBHm_Chr7g0186971	2.69585	5e-05	0.00322834	2.52499	5e-05	0.00322834	-1.71226	0.00015	0.00788832	methionine gamma-lyase	methionine gamma-lyase [Rosa chinensis]	F:GO:0030170; F:GO:0003824	K01761 map00270 Cysteine and methionine metabolism
RchiOBHm_Chr7g0186981	--	--	--	--	--	--	2.16257	5e-05	0.00322834	cytochrome P450 78A9-like	cytochrome P450 78A9-like [Rosa chinensis]	F:GO:0005506; P:GO:0055114; F:GO:0020037	--
RchiOBHm_Chr7g0187141	-2.53222	0.00105	0.0339528	--	--	--	--	--	--	transcription factor MYC2-like	transcription factor MYC2-like isoform X1 [Rosa chinensis]	F:GO:0046983	K13422 map04016 MAPK signaling pathway - plant
RchiOBHm_Chr7g0187321	--	--	--	-2.83583	0.0003	0.0134078	--	--	--	probable lysophospholipase BODYGUARD 3	probable lysophospholipase BODYGUARD 3 [Rosa chinensis]	--	--
RchiOBHm_Chr7g0187341	-2.40577	5e-05	0.00322834	-2.55878	5e-05	0.00322834	--	--	--	beta-carotene isomerase D27, chloroplastic	beta-carotene isomerase D27, chloroplastic [Rosa chinensis]	--	--
RchiOBHm_Chr7g0187471	-2.55815	0.0011	0.0351307	--	--	--	--	--	--	uncharacterized LOC112179044	uncharacterized protein LOC112179044 [Rosa chinensis]	--	--
RchiOBHm_Chr7g0187571	--	--	--	--	--	--	1.91387	0.001	0.0328082	granule-bound starch synthase 1, chloroplastic/amyloplastic-like	granule-bound starch synthase 1, chloroplastic/amyloplastic-like [Rosa chinensis]	F:GO:0004373	K13679 map00500 Starch and sucrose metabolism
RchiOBHm_Chr7g0187841	--	--	--	--	--	--	-2.62737	5e-05	0.00322834	heavy metal-associated isoprenylated plant protein 30-like	heavy metal-associated isoprenylated plant protein 30-like [Rosa chinensis]	F:GO:0046872; P:GO:0030001	--
RchiOBHm_Chr7g0187861	--	--	--	--	--	--	-4.02803	5e-05	0.00322834	uncharacterized LOC112176134	uncharacterized protein LOC112176134 [Rosa chinensis]	0	--
RchiOBHm_Chr7g0188201	-2.9535	5e-05	0.00322834	-3.85999	5e-05	0.00322834	--	--	--	probable aquaporin NIP5-1	probable aquaporin NIP5-1 [Rosa chinensis]	C:GO:0016020; P:GO:0006810; F:GO:0005215	--
RchiOBHm_Chr7g0188681	-3.74395	0.0006	0.0226208	--	--	--	-3.37181	0.00015	0.00788832	ethylene-responsive transcription factor ERF114-like	putative transcription factor AP2-EREBP family [Rosa chinensis]	F:GO:0003677	--
RchiOBHm_Chr7g0188771	2.42654	5e-05	0.00322834	--	--	--	--	--	--	probable alpha-mannosidase At5g13980	probable alpha-mannosidase At5g13980 [Rosa chinensis]	P:GO:0005975; F:GO:0004559; F:GO:0008270; F:GO:0003824; P:GO:0006013; F:GO:0015923; F:GO:0030246	K01191 map00511 Other glycan degradation
RchiOBHm_Chr7g0189001	-2.07264	5e-05	0.00322834	--	--	--	-1.92096	0.00025	0.0115953	mitochondrial phosphate carrier protein 2, mitochondrial	mitochondrial phosphate carrier protein 2, mitochondrial [Rosa chinensis]	--	--
RchiOBHm_Chr7g0189281	--	--	--	-2.68712	0.0009	0.0303727	--	--	--	NAC domain-containing protein 83-like	NAC domain-containing protein 83-like [Rosa chinensis]	F:GO:0003677	--
RchiOBHm_Chr7g0189441	1.94309	0.00025	0.0115953	--	--	--	--	--	--	TPD1 protein homolog 1-like	TPD1 protein homolog 1-like [Rosa chinensis]	--	--
RchiOBHm_Chr7g0189711	-3.15138	5e-05	0.00322834	-2.77504	5e-05	0.00322834	--	--	--	HVA22-like protein e	HVA22-like protein e [Rosa chinensis]	--	--
RchiOBHm_Chr7g0189931	-1.51052	0.00165	0.0467628	-2.06422	5e-05	0.00322834	--	--	--	non-specific phospholipase C6	non-specific phospholipase C6 [Rosa chinensis]	F:GO:0003824; P:GO:0008152	K01114 map00562 Inositol phosphate metabolism
RchiOBHm_Chr7g0190021	-2.05535	5e-05	0.00322834	-2.39678	0.0001	0.00572684	--	--	--	thylakoid lumenal 17.9 kDa protein, chloroplastic	thylakoid lumenal 17.9 kDa protein, chloroplastic [Rosa chinensis]	--	--
RchiOBHm_Chr7g0190191	--	--	--	1.41187	0.00175	0.0488412	--	--	--	F-box protein At1g67340-like	F-box protein At1g67340-like [Rosa chinensis]	F:GO:0005515	--
RchiOBHm_Chr7g0190321	--	--	--	--	--	--	-4.22951	5e-05	0.00322834	SNF1-related protein kinase regulatory subunit gamma-1	SNF1-related protein kinase regulatory subunit gamma-1 [Rosa chinensis]	F:GO:0003824	--
RchiOBHm_Chr7g0190341	-4.6566	5e-05	0.00322834	-4.28869	5e-05	0.00322834	-1.98876	0.00075	0.026584	cytochrome P450 94B3-like	cytochrome P450 94B3-like [Rosa chinensis]	F:GO:0005506; P:GO:0055114; F:GO:0020037	--
RchiOBHm_Chr7g0190671	--	--	--	--	--	--	1.4615	0.00145	0.0426478	4-coumarate--CoA ligase-like 9	hypothetical protein RchiOBHm_Chr7g0190671 [Rosa chinensis]	--	--
RchiOBHm_Chr7g0191371	-2.18481	0.0002	0.00978718	-1.94859	5e-05	0.00322834	--	--	--	GDSL esterase/lipase At3g48460	GDSL esterase/lipase At3g48460 [Rosa chinensis]	--	--
RchiOBHm_Chr7g0191481	--	--	--	-2.05386	0.0008	0.027924	--	--	--	CBBY-like protein	CBBY-like protein [Rosa chinensis]	P:GO:0008152; F:GO:0016787	--
RchiOBHm_Chr7g0191791	--	--	--	-2.13201	5e-05	0.00322834	--	--	--	vignain-like	vignain-like [Rosa chinensis]	P:GO:0006508; F:GO:0008234	--
RchiOBHm_Chr7g0192161	--	--	--	--	--	--	1.66349	0.00125	0.0385361	cytochrome P450 71A1-like	putative premnaspirodiene oxygenase [Rosa chinensis]	F:GO:0005506; P:GO:0055114; F:GO:0020037	--
RchiOBHm_Chr7g0192181	-1.63504	0.0013	0.0396058	-2.21663	5e-05	0.00322834	1.65114	0.0002	0.00978718	cytochrome P450 71A26-like	cytochrome P450 71A26-like [Rosa chinensis]	F:GO:0005506; P:GO:0055114; F:GO:0020037	K00512 map01100 Metabolic pathways
RchiOBHm_Chr7g0192351	--	--	--	--	--	--	1.87521	5e-05	0.00322834	quinolinate synthase, chloroplastic	quinolinate synthase, chloroplastic [Rosa chinensis]	P:GO:0009435; F:GO:0008987	K03517 map00760 Nicotinate and nicotinamide metabolism
RchiOBHm_Chr7g0192401	--	--	--	--	--	--	2.17342	5e-05	0.00322834	high-affinity nitrate transporter 3.1-like	high-affinity nitrate transporter 3.1-like [Rosa chinensis]	P:GO:0015706; P:GO:0010167	--
RchiOBHm_Chr7g0193761	--	--	--	-2.52935	0.00075	0.026584	-4.1274	0.0013	0.0396058	transcription factor bHLH162-like	transcription factor bHLH162-like [Rosa chinensis]	F:GO:0003677; F:GO:0046983	--
RchiOBHm_Chr7g0193831	-4.09283	5e-05	0.00322834	-2.83933	5e-05	0.00322834	-5.44637	5e-05	0.00322834	U-box domain-containing protein 19-like	U-box domain-containing protein 19-like [Rosa chinensis]	F:GO:0004842; F:GO:0005515; F:GO:0005488; P:GO:0016567	--
RchiOBHm_Chr7g0193901	--	--	--	--	--	--	-4.86749	5e-05	0.00322834	probable alpha,alpha-trehalose-phosphate synthase [UDP-forming] 9	probable alpha,alpha-trehalose-phosphate synthase [UDP-forming]	F:GO:0003824; P:GO:0005992	K16055 map00500 Starch and sucrose metabolism
RchiOBHm_Chr7g0193921	--	--	--	--	--	--	-1.60723	0.00045	0.0182298	uncharacterized LOC112176777	uncharacterized protein LOC112176777 [Rosa chinensis]	--	--
RchiOBHm_Chr7g0194511	--	--	--	-2.26449	0.00015	0.00788832	--	--	--	GDSL esterase/lipase At4g10955-like	GDSL esterase/lipase At4g10955-like [Rosa chinensis]	P:GO:0006629	--
RchiOBHm_Chr7g0194801	--	--	--	--	--	--	-1.84804	0.001	0.0328082	RING-H2 finger protein ATL20-like	putative wall-associated receptor kinase, galacturonan-binding domain-containing protein [Rosa chinensis]	F:GO:0030247	--
RchiOBHm_Chr7g0194991	--	--	--	-2.34679	5e-05	0.00322834	--	--	--	endoglucanase 6	endoglucanase 6 [Rosa chinensis]	P:GO:0005975; F:GO:0003824; F:GO:0030246	K01179 map00500 Starch and sucrose metabolism
RchiOBHm_Chr7g0195031	-2.63333	5e-05	0.00322834	-2.58039	5e-05	0.00322834	-3.72793	5e-05	0.00322834	ethylene-responsive transcription factor ERF061	putative transcription factor AP2-EREBP family [Rosa chinensis]	F:GO:0003677	--
RchiOBHm_Chr7g0195191	-1.91497	0.0003	0.0134078	--	--	--	-2.23666	5e-05	0.00322834	probable WRKY transcription factor 53	probable WRKY transcription factor 53 [Rosa chinensis]	F:GO:0043565	--
RchiOBHm_Chr7g0196011	--	--	--	--	--	--	-2.5865	5e-05	0.00322834	disease resistance response protein 206-like	disease resistance response protein 206-like [Rosa chinensis]	--	--
RchiOBHm_Chr7g0196201	--	--	--	--	--	--	-2.0526	0.00065	0.0239894	uncharacterized LOC112177445	uncharacterized protein LOC112177445 [Rosa chinensis]	--	--
RchiOBHm_Chr7g0196451	-2.22564	5e-05	0.00322834	--	--	--	-2.07265	0.00025	0.0115953	late embryogenesis abundant protein At1g64065-like	late embryogenesis abundant protein At1g64065-like [Rosa chinensis]	--	--
RchiOBHm_Chr7g0196461	--	--	--	--	--	--	-2.21124	5e-05	0.00322834	late embryogenesis abundant protein At1g64065	late embryogenesis abundant protein At1g64065 [Rosa chinensis]	--	--
RchiOBHm_Chr7g0196931	-3.61071	5e-05	0.00322834	-5.67024	5e-05	0.00322834	--	--	--	phosphoglycerate mutase-like protein AT74H	phosphoglycerate mutase-like protein AT74H isoform X2 [Rosa chinensis]	F:GO:0003824; P:GO:0008152	--
RchiOBHm_Chr7g0197251	--	--	--	--	--	--	1.87092	0.0002	0.00978718	cytochrome P450 86A22-like	cytochrome P450 86A22-like [Rosa chinensis]	F:GO:0005506; P:GO:0055114; F:GO:0020037	K15398 map00073 Cutin, suberine and wax biosynthesis
RchiOBHm_Chr7g0197781	--	--	--	--	--	--	2.12715	0.00055	0.0211442	probable copper-transporting ATPase HMA5	probable copper-transporting ATPase HMA5 [Rosa chinensis]	F:GO:0000166; P:GO:0006812; F:GO:0005507; F:GO:0019829; F:GO:0046872; C:GO:0016021; P:GO:0030001	K17686 map04016 MAPK signaling pathway - plant
RchiOBHm_Chr7g0198211	-2.15661	5e-05	0.00322834	--	--	--	--	--	--	oxalate--CoA ligase	oxalate--CoA ligase [Rosa chinensis]	F:GO:0003824; P:GO:0008152	K22133 map00630 Glyoxylate and dicarboxylate metabolism
RchiOBHm_Chr7g0198711	2.00597	0.0001	0.00572684	3.39609	5e-05	0.00322834	--	--	--	thaumatin-like protein 1	putative thaumatin [Rosa chinensis]	--	--
RchiOBHm_Chr7g0198751	--	--	--	2.39775	5e-05	0.00322834	--	--	--	protein P21-like	protein P21-like [Rosa chinensis]	--	--
RchiOBHm_Chr7g0198901	--	--	--	--	--	--	-1.89056	0.0013	0.0396058	bifunctional UDP-glucose 4-epimerase and UDP-xylose 4-epimerase 1	bifunctional UDP-glucose 4-epimerase and UDP-xylose 4-epimerase 1 [Rosa chinensis]	F:GO:0003978; P:GO:0006012	K01784 map00052 Galactose metabolism
RchiOBHm_Chr7g0199531	-1.9347	0.00095	0.0315944	--	--	--	--	--	--	molybdenum cofactor sulfurase-like	molybdenum cofactor sulfurase-like [Rosa chinensis]	F:GO:0003824	--
RchiOBHm_Chr7g0199641	--	--	--	--	--	--	1.44731	0.00175	0.0488412	bifunctional dTDP-4-dehydrorhamnose 3,5-epimerase/dTDP-4-dehydrorhamnose reductase	bifunctional dTDP-4-dehydrorhamnose 3,5-epimerase/dTDP-4-dehydrorhamnose reductase [Rosa chinensis]	--	K12451 map00520 Amino sugar and nucleotide sugar metabolism
RchiOBHm_Chr7g0199941	-2.90692	0.00025	0.0115953	-2.73379	0.00075	0.026584	3.32145	5e-05	0.00322834	leucoanthocyanidin dioxygenase	leucoanthocyanidin dioxygenase [Rosa chinensis]	F:GO:0016491; P:GO:0055114	K05277 map00941 Flavonoid biosynthesis
RchiOBHm_Chr7g0200381	--	--	--	--	--	--	1.98506	0.0008	0.027924	guard cell S-type anion channel SLAC1	guard cell S-type anion channel SLAC1 [Rosa chinensis]	P:GO:0055085; C:GO:0016021	--
RchiOBHm_Chr7g0201401	-1.83067	5e-05	0.00322834	--	--	--	-2.30708	5e-05	0.00322834	major allergen Pru ar 1-like	major allergen Pru ar 1-like [Rosa chinensis]	P:GO:0009607; P:GO:0006952	--
RchiOBHm_Chr7g0201531	--	--	--	--	--	--	-2.61937	0.00055	0.0211442	uncharacterized LOC112179677	uncharacterized protein LOC112179677 [Rosa chinensis]	--	--
RchiOBHm_Chr7g0202091	3.03313	5e-05	0.00322834	2.40789	5e-05	0.00322834	--	--	--	21 kDa protein	21 kDa protein [Rosa chinensis]	F:GO:0004857	--
RchiOBHm_Chr7g0202271	--	--	--	-1.54707	0.00155	0.0447056	--	--	--	monocopper oxidase-like protein SKU5	monocopper oxidase-like protein SKU5 [Rosa chinensis]	F:GO:0005507; F:GO:0016491; P:GO:0055114	--
RchiOBHm_Chr7g0202821	--	--	--	1.96819	0.00025	0.0115953	--	--	--	14 kDa proline-rich protein DC2.15-like	14 kDa proline-rich protein DC2.15-like [Rosa chinensis]	--	--
RchiOBHm_Chr7g0203041	-3.37937	0.00135	0.04063	--	--	--	--	--	--	heat shock 22 kDa protein, mitochondrial-like	heat shock 22 kDa protein, mitochondrial-like [Rosa chinensis]	--	K13993 map04141 Protein processing in endoplasmic reticulum
RchiOBHm_Chr7g0203111	2.37622	0.00025	0.0115953	3.15199	5e-05	0.00322834	3.40039	5e-05	0.00322834	probable aspartyl protease At4g16563	LOW QUALITY PROTEIN: probable aspartyl protease At4g16563 [Rosa chinensis]	F:GO:0004190; P:GO:0006508	--
RchiOBHm_Chr7g0203261	-2.5805	0.0013	0.0396058	-3.58479	0.0014	0.0416089	--	--	--	probable pectinesterase 68	probable pectinesterase 68 [Rosa chinensis]	C:GO:0005618; P:GO:0042545; F:GO:0030599	--
RchiOBHm_Chr7g0204611	-2.11598	0.00015	0.00788832	--	--	--	-2.65731	5e-05	0.00322834	ethylene-responsive transcription factor 5-like	ethylene-responsive transcription factor 5-like [Rosa chinensis]	F:GO:0003677	--
RchiOBHm_Chr7g0204641	--	--	--	--	--	--	-3.75672	5e-05	0.00322834	ethylene-responsive transcription factor 2	putative transcription factor AP2-EREBP family [Rosa chinensis]	F:GO:0003677	K14517 map04075 Plant hormone signal transduction
RchiOBHm_Chr7g0204811	-3.67164	5e-05	0.00322834	-3.72164	5e-05	0.00322834	--	--	--	phospholipase A1-Ibeta2, chloroplastic	phospholipase A1-Ibeta2, chloroplastic [Rosa chinensis]	P:GO:0006629	--
RchiOBHm_Chr7g0205401	--	--	--	--	--	--	1.5001	0.0008	0.027924	expansin-like B1	expansin-like B1 [Rosa chinensis]	C:GO:0005576	--
RchiOBHm_Chr7g0206481	1.7384	0.0004	0.0166112	--	--	--	--	--	--	MORN repeat-containing protein 1-like	MORN repeat-containing protein 1-like [Rosa chinensis]	--	--
RchiOBHm_Chr7g0206561	-1.86748	0.00035	0.015033	--	--	--	-1.95179	0.0005	0.0197317	probable serine/threonine-protein kinase PBL19	probable serine/threonine-protein kinase PBL19 [Rosa chinensis]	F:GO:0005524; F:GO:0004672; P:GO:0006468	--
RchiOBHm_Chr7g0207721	--	--	--	--	--	--	3.74676	5e-05	0.00322834	beta-amylase 3, chloroplastic	beta-amylase 3, chloroplastic [Rosa chinensis]	P:GO:0005975; P:GO:0000272; F:GO:0016161	K01177 map00500 Starch and sucrose metabolism
RchiOBHm_Chr7g0207851	--	--	--	--	--	--	2.18603	5e-05	0.00322834	uncharacterized LOC112180049	uncharacterized protein LOC112180049 [Rosa chinensis]	--	--
RchiOBHm_Chr7g0208241	3.0217	0.00035	0.015033	3.59422	5e-05	0.00322834	--	--	--	expansin-like B1	expansin-like B1 [Rosa chinensis]	C:GO:0005576	--
RchiOBHm_Chr7g0208811	-1.46453	0.0015	0.0436334	--	--	--	--	--	--	protein transport protein Sec61 subunit gamma	putative protein translocase complex, SecE/Sec61-gamma subunit, protein translocase SecE [Rosa chinensis]	P:GO:0006605; F:GO:0015450; C:GO:0016020; P:GO:0015031; P:GO:0006886	K07342 map03060 Protein export
RchiOBHm_Chr7g0208891	--	--	--	-1.84677	0.0014	0.0416089	-2.88122	5e-05	0.00322834	protein NRT1/ PTR FAMILY 7.3	protein NRT1/ PTR FAMILY 7.3 [Rosa chinensis]	C:GO:0016020; P:GO:0006810; F:GO:0005215	--
RchiOBHm_Chr7g0210291	1.49167	0.0012	0.0373427	--	--	--	--	--	--	ABC transporter B family member 2-like	ABC transporter B family member 2-like [Rosa chinensis]	F:GO:0016887; F:GO:0005524; P:GO:0055085; C:GO:0016021; P:GO:0006810	K05658 map02010 ABC transporters
RchiOBHm_Chr7g0210321	--	--	--	--	--	--	2.10833	0.0001	0.00572684	alpha,alpha-trehalose-phosphate synthase [UDP-forming] 5-like	alpha,alpha-trehalose-phosphate synthase [UDP-forming]	F:GO:0003824; P:GO:0005992	K16055 map00500 Starch and sucrose metabolism
RchiOBHm_Chr7g0212181	-3.3906	0.00045	0.0182298	--	--	--	--	--	--	phenylalanine ammonia-lyase 1-like	phenylalanine ammonia-lyase 1-like [Rosa chinensis]	P:GO:0006559; C:GO:0005737; F:GO:0003824; F:GO:0016841	K10775 map00360 Phenylalanine metabolism
RchiOBHm_Chr7g0212471	1.8287	0.0011	0.0351307	--	--	--	--	--	--	disease resistance protein RPM1-like	disease resistance protein RPM1-like [Rosa chinensis]	F:GO:0043531	K13457 map04626 Plant-pathogen interaction
RchiOBHm_Chr7g0213261	--	--	--	--	--	--	-2.12722	0.0002	0.00978718	protein PAM68, chloroplastic	protein PAM68, chloroplastic [Rosa chinensis]	--	--
RchiOBHm_Chr7g0215641	3.69595	0.00105	0.0339528	3.89317	0.0005	0.0197317	--	--	--	transport and Golgi organization 2 homolog	transport and Golgi organization 2 homolog isoform X1 [Rosa chinensis]	--	--
RchiOBHm_Chr7g0216231	-2.85382	5e-05	0.00322834	-3.01379	5e-05	0.00322834	--	--	--	glyceraldehyde-3-phosphate dehydrogenase B, chloroplastic	glyceraldehyde-3-phosphate dehydrogenase B, chloroplastic [Rosa chinensis]	F:GO:0050661; F:GO:0051287; P:GO:0055114; P:GO:0006006	K05298 map00710 Carbon fixation in photosynthetic organisms
RchiOBHm_Chr7g0217441	--	--	--	-2.64218	0.0001	0.00572684	--	--	--	galactan beta-1,4-galactosyltransferase GALS1	galactan beta-1,4-galactosyltransferase GALS1 [Rosa chinensis]	--	--
RchiOBHm_Chr7g0218061	--	--	--	-2.032	0.00155	0.0447056	--	--	--	uncharacterized LOC112175475	uncharacterized protein LOC112175475 isoform X2 [Rosa chinensis]	--	--
RchiOBHm_Chr7g0218171	-1.92408	0.00035	0.015033	-3.20309	5e-05	0.00322834	--	--	--	ferric reduction oxidase 7, chloroplastic	ferric reduction oxidase 7, chloroplastic [Rosa chinensis]	F:GO:0016491; C:GO:0016020; P:GO:0055114	--
RchiOBHm_Chr7g0218271	--	--	--	-2.59995	0.0001	0.00572684	--	--	--	START domain-containing protein 10	START domain-containing protein 10 [Rosa chinensis]	F:GO:0008289	--
RchiOBHm_Chr7g0220251	--	--	--	--	--	--	2.04495	5e-05	0.00322834	uncharacterized LOC112180010	uncharacterized protein LOC112180010 isoform X3 [Rosa chinensis]	--	--
RchiOBHm_Chr7g0220581	-1.43118	0.00115	0.0362702	--	--	--	--	--	--	stromal 70 kDa heat shock-related protein, chloroplastic-like	stromal 70 kDa heat shock-related protein, chloroplastic-like [Rosa chinensis]	F:GO:0005524; F:GO:0051082; P:GO:0006457	K03283 map03040 Spliceosome
RchiOBHm_Chr7g0222351	-2.13066	5e-05	0.00322834	-2.35821	5e-05	0.00322834	--	--	--	geraniol 8-hydroxylase-like	geraniol 8-hydroxylase-like [Rosa chinensis]	F:GO:0005506; P:GO:0055114; F:GO:0020037	--
RchiOBHm_Chr7g0223691	-2.57609	5e-05	0.00322834	--	--	--	--	--	--	serine/threonine-protein kinase-like protein CCR4	serine/threonine-protein kinase-like protein CCR4 [Rosa chinensis]	F:GO:0005524; F:GO:0004672; P:GO:0006468	--
RchiOBHm_Chr7g0224401	-2.06361	0.00015	0.00788832	--	--	--	--	--	--	EG45-like domain containing protein	putative rlpA-like protein, double-psi beta-barrel [Rosa chinensis]	--	--
RchiOBHm_Chr7g0224761	-1.86676	0.001	0.0328082	-1.87311	0.0007	0.0253552	--	--	--	glycerate dehydrogenase	glycerate dehydrogenase [Rosa chinensis]	F:GO:0051287; P:GO:0008152; P:GO:0055114	K15893 map00260 Glycine, serine and threonine metabolism
RchiOBHm_Chr7g0225361	--	--	--	--	--	--	2.59005	0.0002	0.00978718	non-functional NADPH-dependent codeinone reductase 2-like	non-functional NADPH-dependent codeinone reductase 2-like [Rosa chinensis]	F:GO:0016491; P:GO:0055114	K22374 map00999 Biosynthesis of various plant secondary metabolites
RchiOBHm_Chr7g0227591	--	--	--	1.5141	0.00135	0.04063	--	--	--	patellin-3	patellin-3 [Rosa chinensis]	C:GO:0016021; P:GO:0006810; F:GO:0005215; C:GO:0005622	--
RchiOBHm_Chr7g0227641	--	--	--	1.73102	0.00135	0.04063	1.81223	0.0008	0.027924	patellin-3	patellin-3 [Rosa chinensis]	C:GO:0016021; P:GO:0006810; F:GO:0005215; C:GO:0005622	--
RchiOBHm_Chr7g0228151	-2.15859	0.0002	0.00978718	-2.25235	0.0001	0.00572684	--	--	--	protein PHOTOSYSTEM I ASSEMBLY 2, chloroplastic	protein PHOTOSYSTEM I ASSEMBLY 2, chloroplastic [Rosa chinensis]	F:GO:0031072; F:GO:0051082	--
RchiOBHm_Chr7g0228561	-1.7357	0.0004	0.0166112	-2.02339	0.00015	0.00788832	--	--	--	NAD(P)H-quinone oxidoreductase subunit T, chloroplastic	NAD(P)H-quinone oxidoreductase subunit T, chloroplastic [Rosa chinensis]	--	--
RchiOBHm_Chr7g0232151	--	--	--	--	--	--	1.87895	0.00015	0.00788832	uncharacterized LOC112179404	uncharacterized protein LOC112179404 [Rosa chinensis]	--	--
RchiOBHm_Chr7g0232471	--	--	--	--	--	--	-1.81516	0.0006	0.0226208	receptor-like protein kinase HAIKU2	receptor-like protein kinase HAIKU2 [Rosa chinensis]	F:GO:0005524; F:GO:0005515; F:GO:0004672; P:GO:0006468	--
RchiOBHm_Chr7g0232991	-1.79012	0.00055	0.0211442	-1.73145	0.00075	0.026584	--	--	--	uncharacterized LOC112175318	uncharacterized protein LOC112175318 [Rosa chinensis]	0	--
RchiOBHm_Chr7g0233071	--	--	--	-1.94858	0.00065	0.0239894	--	--	--	glutamyl-tRNA reductase 1, chloroplastic	glutamyl-tRNA reductase 1, chloroplastic [Rosa chinensis]	F:GO:0050661; F:GO:0008883; P:GO:0033014; P:GO:0055114	K02492 map00860 Porphyrin metabolism
RchiOBHm_Chr7g0233361	--	--	--	--	--	--	-1.73198	0.00155	0.0447056	hexose carrier protein HEX6-like	hexose carrier protein HEX6-like [Rosa chinensis]	F:GO:0022891; P:GO:0055085; F:GO:0022857; C:GO:0016020; C:GO:0016021; F:GO:0005215	--
RchiOBHm_Chr7g0235101	-3.8749	0.00085	0.0292322	-3.35588	0.0012	0.0373427	--	--	--	heat shock cognate 70 kDa protein 2-like	heat shock cognate 70 kDa protein 2-like [Rosa chinensis]	--	K03283 map03040 Spliceosome
RchiOBHm_Chr7g0236871	--	--	--	--	--	--	-1.88835	0.00065	0.0239894	AT-hook motif nuclear-localized protein 17-like	AT-hook motif nuclear-localized protein 17-like [Rosa chinensis]	--	--
RchiOBHm_Chr7g0237101	-3.03421	5e-05	0.00322834	--	--	--	--	--	--	mitochondrial uncoupling protein 5-like	mitochondrial uncoupling protein 5-like [Rosa chinensis]	P:GO:0055085	--
RchiOBHm_Chr7g0237691	-1.73046	0.0008	0.027924	--	--	--	--	--	--	esterase AGAP003155-like	putative dihydrofolate reductase [Rosa chinensis]	--	--
RchiOBHm_Chr7g0238811	--	--	--	--	--	--	-2.18374	0.0006	0.0226208	uncharacterized LOC112178402	putative PGG domain-containing protein [Rosa chinensis]	--	--
RchiOBHm_Chr7g0239051	--	--	--	--	--	--	2.10868	0.00025	0.0115953	sugar transport protein 5-like	sugar transport protein 5-like [Rosa chinensis]	F:GO:0022891; P:GO:0055085; F:GO:0022857; C:GO:0016020; C:GO:0016021; F:GO:0005215	--
RchiOBHm_Chr7g0239911	--	--	--	--	--	--	1.58844	0.0004	0.0166112	uncharacterized LOC112175233	uncharacterized protein LOC112175233 [Rosa chinensis]	--	--
RchiOBHm_Chr7g0240041	2.11493	0.00085	0.0292322	--	--	--	--	--	--	low affinity sulfate transporter 3-like	low affinity sulfate transporter 3-like isoform X1 [Rosa chinensis]	P:GO:0008272; F:GO:0008271; P:GO:0055085; C:GO:0016020; C:GO:0016021; F:GO:0015116	--
RchiOBHm_Chr7g0240981	-1.55748	0.001	0.0328082	--	--	--	--	--	--	probable calcium-binding protein CML29	probable calcium-binding protein CML29 [Rosa chinensis]	F:GO:0005509	K02183 map04016 MAPK signaling pathway - plant
RchiOBHm_Chr7g0241861	--	--	--	--	--	--	2.30742	0.001	0.0328082	transcription factor MYB30-like	transcription factor MYB30-like [Rosa chinensis]	F:GO:0003677	--
RchiOBHm_Chr7g0241901	2.109	5e-05	0.00322834	1.50462	0.0009	0.0303727	--	--	--	CTP synthase-like	CTP synthase-like isoform X1 [Rosa chinensis]	P:GO:0006221; F:GO:0003883	K01937 map00240 Pyrimidine metabolism
RchiOBHm_Chr7g0242321	-2.49534	0.0009	0.0303727	--	--	--	-2.61641	0.00025	0.0115953	uncharacterized LOC112178904	uncharacterized protein LOC112178904 [Rosa chinensis]	--	--
RchiOBHm_Chr7g0242891	--	--	--	--	--	--	-1.81893	0.0012	0.0373427	annexin D5-like	annexin D5-like [Rosa chinensis]	F:GO:0005509; F:GO:0005544	--
RchiOBHm_Chr7g0243681	-3.78464	5e-05	0.00322834	-4.08019	5e-05	0.00322834	--	--	--	protein EXORDIUM-like 1	protein EXORDIUM-like 1 [Rosa chinensis]	--	--
RchiOBHm_Chr7g0243691	--	--	--	-2.0804	0.00045	0.0182298	--	--	--	protein EXORDIUM-like	protein EXORDIUM-like [Rosa chinensis]	--	--
